# Supplementary material for: Nuclear receptor corepressor 1 controls regulatory T cell subset differentiation and effector function
Source: PubMed Central journal article supplement (PMC11517256; doi:10.7554/elife.78738), 2024-10-28

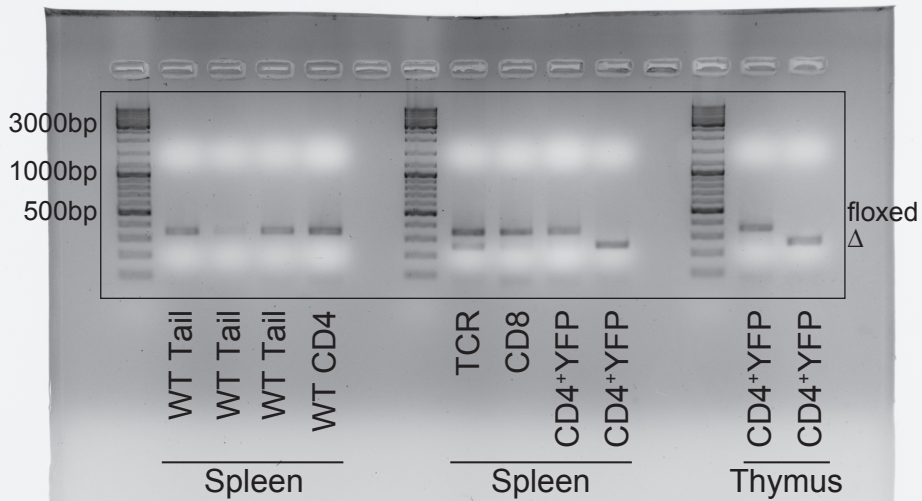

Supplement: elife-78738-fig3-figsupp1-data2.pdf [file elife-78738-fig3-figsupp1-data2.pdf]
