# Supplementary material for: Nuclear receptor corepressor 1 controls regulatory T cell subset differentiation and effector function
Source: eLife. 2024 Oct 28;13:e78738. doi: 10.7554/eLife.78738 (PMC11517256; doi:10.7554/eLife.78738)
Supplement: Supplementary file 1. — (a) List of differentially expressed genes (DEG) between NCOR1-cKO and WT naive Treg cells. FDR <0.05. (b) DEG between NCOR1-cKO and WT effector Treg cells. FDR <0.05. (c). Gene Set Enrichment Analysis (GSEA) hallmark gene sets enriched between NCOR1-cKO and WT naïve Treg cells. (d) GSEA hallmark gene sets enriched between NCOR1-cKO and WT effector Treg cells. (e) Top 50 Canonical Pathways (identified by Ingenuity Pathways Analysis) between NCOR1-cKO and WT naive Treg cells. (f) Top 50 Canonical Pathways (identified by Ingenuity Pathways Analysis) between NCOR1-cKO and WT effector Treg cells. (g) Naive and effector Treg cell gene sets. The lists show the 100 most DEG between naive and effector WT Treg cells. [file elife-78738-supp1.xlsx]

## Sheet: Supplementary file 1a
Supplementary file 1a. DEG between NCOR1-cKO and WT naive Treg cells
Mpeg1	protein_coding	30.1155	-8.16601	1.43637	-5.68517	1.30685e-08	2.02696e-06
Plbd1	protein_coding	18.164	-7.59276	1.44079	-5.26986	1.36528e-07	1.59565e-05
Aldh1a2	protein_coding	8.51659	-7.25967	1.95195	-3.71918	0.000199871	0.00570922
Igkv19-93	IG_V_gene	5.29241	-7.04159	2.1348	-3.29847	0.000972121	0.0172365
Ttc8	protein_coding	39.6249	-7.03568	1.26815	-5.54798	2.88988e-08	4.03029e-06
Rapgef3	protein_coding	11.7309	-6.96416	1.51705	-4.59058	4.42019e-06	0.000303677
Siglecg	protein_coding	9.70758	-6.92965	1.7693	-3.9166	8.98058e-05	0.00312456
Gata2	protein_coding	11.2151	-6.90109	1.38395	-4.98652	6.14769e-07	5.73186e-05
Wnt10a	protein_coding	30.8628	-6.88378	1.41597	-4.86152	1.16488e-06	0.000100105
I830077J02Rik	protein_coding	7.20978	-6.76788	1.9023	-3.55773	0.000374071	0.00910275
Nr3c2	protein_coding	39.7267	-6.74158	1.48658	-4.53495	5.76166e-06	0.000374983
Gm37519	TEC	13.4687	-6.72946	1.63208	-4.12325	3.73568e-05	0.00165326
Spag16	protein_coding	9.23637	-6.58162	1.58577	-4.15043	3.31845e-05	0.00152135
Cd5l	protein_coding	12.6886	-6.57601	1.63878	-4.01274	6.00168e-05	0.00233812
Nectin2	protein_coding	22.2065	-6.43869	1.2948	-4.97275	6.60091e-07	6.08604e-05
Gm43915	antisense	5.33108	-6.43054	1.75174	-3.67095	0.000241651	0.00657448
Fn1	protein_coding	7.28231	-6.31449	2.0227	-3.12182	0.00179737	0.026166
Gm18994	processed_pseudogene	9.51641	-6.31048	1.45698	-4.33121	1.48292e-05	0.000791338
Fndc7	protein_coding	10.9599	-6.21098	1.44069	-4.31112	1.62427e-05	0.000845028
Gfpt2	protein_coding	22.5978	-6.11495	1.24194	-4.9237	8.49221e-07	7.6182e-05
Fzd5	protein_coding	8.09574	-6.10678	1.80685	-3.37979	0.000725408	0.0142463
Gm33195	lincRNA	27.8703	-6.07974	1.23971	-4.90415	9.38322e-07	8.32748e-05
Apc2	protein_coding	6.03996	-5.97296	1.78125	-3.35325	0.000798683	0.0152356
Sytl4	protein_coding	6.89215	-5.84512	1.95714	-2.98657	0.00282128	0.0359092
Pla2g7	protein_coding	9.43693	-5.82282	1.61573	-3.60383	0.00031356	0.00793269
Smim10l2a	protein_coding	104.495	-5.82189	1.02132	-5.70038	1.19539e-08	1.8894e-06
Gm44901	TEC	8.73114	-5.79808	1.58817	-3.65078	0.000261443	0.00692095
Amz1	protein_coding	10.2059	-5.79717	1.6794	-3.45193	0.000556598	0.0117973
Tgfbi	protein_coding	9.58154	-5.77952	2.03758	-2.83646	0.00456167	0.0490639
Cpne7	protein_coding	43.8235	-5.70982	1.31381	-4.346	1.38645e-05	0.000754411
Actg2	protein_coding	121.268	-5.70857	1.01756	-5.61007	2.0224e-08	2.97024e-06
Tmem132a	protein_coding	6.23438	-5.70597	1.94937	-2.92708	0.0034216	0.0404225
Gxylt2	protein_coding	7.10471	-5.63806	1.58915	-3.54785	0.000388392	0.00932205
Gas7	protein_coding	8.89548	-5.63253	1.49354	-3.77126	0.000162427	0.00501048
Glt28d2	protein_coding	20.1731	-5.56214	1.42279	-3.90932	9.25546e-05	0.00320008
Gm45453	TEC	5.29067	-5.54102	1.60455	-3.45332	0.000553742	0.0117518
Gm34680	lincRNA	19.5003	-5.51773	1.34308	-4.10827	3.98641e-05	0.00174391
Clec4a1	protein_coding	8.64457	-5.51637	1.73433	-3.1807	0.0014692	0.0227664
6030445D17Rik	protein_coding	5.72794	-5.49263	1.75731	-3.12558	0.00177454	0.0259473
Epb41l5	protein_coding	9.85078	-5.49252	1.86232	-2.94929	0.0031851	0.0386969
Col1a1	protein_coding	14.085	-5.48622	1.44598	-3.79413	0.000148164	0.00466589
Large2	protein_coding	8.33315	-5.45206	1.56087	-3.49297	0.000477684	0.0106432
Arhgap24	protein_coding	27.7328	-5.44789	1.25586	-4.33798	1.43797e-05	0.000772315
Fcgr4	protein_coding	6.88633	-5.43108	1.8546	-2.92843	0.00340673	0.0404036
Igkv10-96	IG_V_gene	6.84637	-5.4245	1.63618	-3.31535	0.000915281	0.0166923
Tppp	protein_coding	13.9332	-5.40153	1.81444	-2.97697	0.00291115	0.0364353
Itgad	protein_coding	12.8571	-5.40151	1.52105	-3.55117	0.000383526	0.00923802
Slc12a5	protein_coding	11.0285	-5.39393	1.45863	-3.69794	0.000217354	0.00611392
Mmp14	protein_coding	28.8213	-5.36617	1.43914	-3.72875	0.000192435	0.00558336
Ccr10	protein_coding	31.6696	-5.35939	1.41546	-3.78633	0.000152886	0.00476312
Spic	protein_coding	8.5713	-5.34624	1.392	-3.84069	0.00012269	0.00399249
Clec4a3	protein_coding	7.66126	-5.34119	1.61726	-3.30262	0.000957847	0.0170763
Stkld1	protein_coding	7.84522	-5.31525	1.41867	-3.74664	0.000179219	0.00534473
Adgrv1	protein_coding	5.36703	-5.31028	1.72104	-3.08551	0.00203206	0.0285073
Tspear	protein_coding	10.6602	-5.22408	1.66417	-3.13915	0.00169438	0.025265
Olfr157	protein_coding	9.17644	-5.19693	1.52555	-3.40659	0.000657799	0.0132808
Gm38346	TEC	8.61415	-5.196	1.65558	-3.13848	0.00169824	0.0252772
Zfp449	protein_coding	34.4094	-5.11162	1.05427	-4.84848	1.24413e-06	0.000103842
Slc4a5	protein_coding	7.38914	-5.10802	1.57916	-3.23464	0.00121796	0.0200601
Gm37490	TEC	5.76392	-5.09525	1.53368	-3.32224	0.000892983	0.0164666
4931415C17Rik	processed_transcript	6.6929	-5.06744	1.45397	-3.48525	0.000491669	0.0108076
Zfp518b	protein_coding	14.7755	-5.04686	1.50201	-3.36008	0.000779205	0.0150368
Phf21b	protein_coding	8.89683	-5.04383	1.59912	-3.15412	0.00160981	0.0243986
Tfr2	protein_coding	5.76367	-5.04236	1.70447	-2.95831	0.0030933	0.0378596
Nox1	protein_coding	15.4399	-4.99471	1.4044	-3.55647	0.000375867	0.00912717
G530011O06Rik	processed_transcript	11.4336	-4.96753	1.40235	-3.54229	0.00039667	0.0094101
Gm44389	processed_pseudogene	17.6649	-4.95271	1.10549	-4.48012	7.46004e-06	0.000472545
Tex14	protein_coding	5.76132	-4.9218	1.72414	-2.85463	0.00430865	0.0472056
Palld	protein_coding	25.8352	-4.89858	1.45068	-3.37674	0.0007335	0.0143214
Dab2ip	protein_coding	26.4487	-4.87547	1.29392	-3.76797	0.000164577	0.00504866
Igsf9b	protein_coding	49.1725	-4.86149	1.31958	-3.68412	0.000229496	0.00633729
Map9	protein_coding	13.626	-4.86004	1.52736	-3.18199	0.00146268	0.0227078
Gm43961	TEC	8.53271	-4.84137	1.32395	-3.65676	0.000255419	0.006815
Gm42429	TEC	6.43689	-4.83493	1.62449	-2.97628	0.00291772	0.0364353
Rin2	protein_coding	137.268	-4.82655	1.09448	-4.4099	1.03417e-05	0.000602213
Pls3	protein_coding	23.4814	-4.76839	1.46818	-3.24782	0.00116294	0.0194488
Svip	protein_coding	8.4849	-4.74962	1.52904	-3.10627	0.00189461	0.02707
Hgfac	protein_coding	45.6802	-4.73018	1.34731	-3.51083	0.000446716	0.010128
Rnase6	protein_coding	14.9639	-4.72077	1.23086	-3.83534	0.000125392	0.00404864
Ripk4	protein_coding	9.51523	-4.71468	1.49544	-3.15271	0.00161765	0.0244863
Nid2	protein_coding	73.3442	-4.7021	1.32808	-3.54053	0.000399331	0.0094406
Il13ra1	protein_coding	31.2713	-4.62181	1.46994	-3.14422	0.00166531	0.024999
Lima1	protein_coding	33.899	-4.59115	1.05828	-4.33832	1.43573e-05	0.000772315
Hif3a	protein_coding	17.4469	-4.56429	1.46386	-3.11798	0.00182093	0.0263932
Lonrf1	protein_coding	7.03633	-4.53929	1.5793	-2.87424	0.00405007	0.0453542
Chdh	protein_coding	33.089	-4.53475	1.33585	-3.39465	0.000687173	0.0137401
Ighg3	IG_C_gene	27.5921	-4.53267	1.45141	-3.12295	0.00179047	0.0260884
Gm16702	lincRNA	38.5359	-4.50862	1.35197	-3.33485	0.000853447	0.0159502
Icam5	protein_coding	23.3015	-4.45689	1.35914	-3.27921	0.00104098	0.0180335
D830030K20Rik	protein_coding	24.6643	-4.44836	1.35212	-3.28992	0.00100216	0.0175441
Susd4	protein_coding	42.6545	-4.41556	1.07034	-4.12539	3.70102e-05	0.0016423
Itpripl2	protein_coding	14.0669	-4.3957	1.33564	-3.29109	0.000998007	0.0175269
Gsta3	protein_coding	6.19141	-4.36826	1.36398	-3.2026	0.00136195	0.0215677
Pianp	protein_coding	18.0937	-4.36267	1.18363	-3.68583	0.000227958	0.00631285
Rgs9	protein_coding	109.659	-4.35357	0.786469	-5.53559	3.10186e-08	4.28987e-06
Gna14	protein_coding	34.346	-4.32786	1.42901	-3.02857	0.00245715	0.032571
2010300C02Rik	protein_coding	7.94882	-4.27728	1.2932	-3.30751	0.000941278	0.0168977
Kdf1	protein_coding	12.5395	-4.1398	1.45787	-2.83963	0.00451658	0.0489058
Armc2	protein_coding	30.4467	-4.10406	1.29775	-3.16245	0.00156447	0.0238638
Clec4n	protein_coding	11.2666	-4.06713	1.3367	-3.04267	0.00234491	0.0315379
Itgb8	protein_coding	270.089	-4.05422	0.495162	-8.18768	2.66311e-16	2.00895e-13
Ticam2	protein_coding	15.6125	-4.02338	1.17461	-3.4253	0.000614117	0.0126765
Zfp112	protein_coding	18.0939	-3.97143	1.2087	-3.28571	0.00101727	0.0177711
Ccdc87	protein_coding	9.63129	-3.88335	1.11464	-3.48395	0.000494079	0.0108462
Pirb	protein_coding	18.1535	-3.64258	1.00523	-3.62364	0.000290484	0.00748583
Gm48627	TEC	8.66154	-3.63801	1.25684	-2.89457	0.00379681	0.0432011
Gm17764	processed_pseudogene	105.049	-3.6368	0.851088	-4.27312	1.92756e-05	0.000966456
Atp6v0d2	protein_coding	231.956	-3.57818	0.913218	-3.91821	8.92077e-05	0.00311388
Serpina3f	protein_coding	203.942	-3.53123	0.574888	-6.14246	8.12519e-10	1.89923e-07
H2-Q1	protein_coding	501.88	-3.52143	0.861159	-4.08917	4.32916e-05	0.00183323
St3gal5	protein_coding	34.3794	-3.51905	0.874014	-4.02631	5.66597e-05	0.00224605
Gprasp2	protein_coding	125.709	-3.50504	0.534907	-6.55262	5.65348e-11	1.59026e-08
Mctp1	protein_coding	121.003	-3.48916	0.453637	-7.69152	1.45399e-14	7.54077e-12
St14	protein_coding	177.484	-3.45979	0.580377	-5.96129	2.50257e-09	4.58399e-07
Gm43149	sense_intronic	7.58561	-3.34209	1.17581	-2.84238	0.00447775	0.048634
Gm17228	processed_pseudogene	133.685	-3.28347	0.899992	-3.64834	0.000263942	0.00696013
Chadl	protein_coding	32.0921	-3.20902	1.00178	-3.20333	0.00135847	0.0215331
Camk2a	protein_coding	34.763	-3.18895	0.720488	-4.42609	9.59546e-06	0.000566713
Plcd1	protein_coding	53.9247	-3.1663	1.02855	-3.07842	0.00208102	0.0289737
Gm5388	processed_pseudogene	12.7044	-3.08628	0.960099	-3.21454	0.00130653	0.0210108
Dpt	protein_coding	12.1338	-3.05509	0.940777	-3.24741	0.00116461	0.0194488
Ppic	protein_coding	30.0465	-3.02059	0.738662	-4.08927	4.32725e-05	0.00183323
Akap2	protein_coding	9.42558	-3.01014	0.984742	-3.05679	0.00223724	0.0304588
Gm42666	processed_pseudogene	27.9526	-2.98168	0.812663	-3.66902	0.000243486	0.0066068
Itga7	protein_coding	64.1991	-2.96723	0.636487	-4.66188	3.13333e-06	0.000227077
Ankrd6	protein_coding	174.775	-2.9116	0.515813	-5.64469	1.65481e-08	2.50938e-06
Nhsl2	protein_coding	42.8249	-2.81041	0.803277	-3.49868	0.000467571	0.0104721
Myo3b	protein_coding	108.18	-2.77122	0.530248	-5.22627	1.72963e-07	1.94617e-05
Col9a3	protein_coding	40.0866	-2.76628	0.925055	-2.9904	0.00278617	0.0358256
A730091E23Rik	TEC	14.6384	-2.75657	0.930958	-2.96101	0.00306633	0.0376675
Gm10499	transcribed_unprocessed_pseudogene	75.6335	-2.72798	0.710231	-3.84098	0.000122544	0.00399249
Xk	protein_coding	56.3608	-2.71377	0.612009	-4.4342	9.24131e-06	0.000551686
H2-Q4	protein_coding	4343.47	-2.70896	0.680165	-3.98279	6.81097e-05	0.00255735
B4galt4	protein_coding	88.4597	-2.70823	0.582334	-4.65065	3.30891e-06	0.000237726
Samd11	protein_coding	55.8062	-2.68209	0.89798	-2.9868	0.00281911	0.0359092
Gm4841	protein_coding	33.9085	-2.67139	0.904483	-2.9535	0.00314197	0.0383413
Fam43a	protein_coding	76.9055	-2.63511	0.730574	-3.6069	0.000309873	0.00785137
H2-Q2	protein_coding	1153.2	-2.61247	0.641902	-4.06988	4.70369e-05	0.00194669
Pmaip1	protein_coding	208.009	-2.60276	0.711574	-3.65775	0.000254441	0.00681178
Gm47692	processed_pseudogene	20.6516	-2.59838	0.828925	-3.13464	0.00172068	0.025474
Tspan9	protein_coding	53.4798	-2.55811	0.569401	-4.49264	7.03461e-06	0.000449025
Pstpip2	protein_coding	77.33	-2.52617	0.322216	-7.83999	4.50596e-15	2.67075e-12
Gm7030	protein_coding	709.81	-2.49552	0.648477	-3.84827	0.000118955	0.00390152
Gbp2b	protein_coding	249.726	-2.4821	0.454937	-5.45593	4.87183e-08	6.31663e-06
Gm28112	sense_intronic	161.054	-2.47773	0.425561	-5.82227	5.8052e-09	9.83093e-07
Sh3tc1	protein_coding	89.4263	-2.47301	0.701978	-3.52291	0.000426829	0.0098521
Gas2l1	protein_coding	52.0788	-2.446	0.750202	-3.26045	0.00111235	0.0189724
Gm3194	protein_coding	53.4924	-2.4395	0.551928	-4.41997	9.87159e-06	0.000576862
Gm3500	protein_coding	48.7588	-2.36381	0.699525	-3.37916	0.000727078	0.0142463
Bicd1	protein_coding	130.561	-2.34006	0.546609	-4.28105	1.86011e-05	0.00093831
Rhod	protein_coding	65.7378	-2.32652	0.529964	-4.38997	1.13367e-05	0.000645047
Pnck	protein_coding	28.9897	-2.3166	0.787625	-2.94125	0.00326893	0.0393981
Vcam1	protein_coding	65.3478	-2.30748	0.553218	-4.17102	3.0324e-05	0.00142171
Src	protein_coding	154.89	-2.28514	0.340334	-6.71441	1.88828e-11	6.1447e-09
Cd80	protein_coding	70.9887	-2.27152	0.475382	-4.7783	1.76787e-06	0.00013905
Dclk2	protein_coding	234.415	-2.26909	0.487755	-4.65211	3.28562e-06	0.000237079
Bcas1	protein_coding	51.0762	-2.26292	0.749238	-3.0203	0.00252524	0.0332346
Serpinc1	protein_coding	93.6471	-2.25265	0.497123	-4.53139	5.8598e-06	0.000379712
Adam4	protein_coding	16.8964	-2.22234	0.741895	-2.99549	0.00274	0.0354151
Plcb4	protein_coding	195.387	-2.21963	0.372385	-5.96058	2.51352e-09	4.58399e-07
Gm46519	lincRNA	109.349	-2.2187	0.72722	-3.05093	0.00228133	0.0308314
Capg	protein_coding	5963.73	-2.14652	0.166333	-12.9049	4.22134e-38	1.435e-34
Plcl1	protein_coding	53.6555	-2.09287	0.615579	-3.39984	0.000674247	0.0135306
Rnf227	protein_coding	67.5438	-2.06168	0.466214	-4.42218	9.77108e-06	0.000573007
Sccpdh	protein_coding	201.484	-2.05536	0.419252	-4.90243	9.46577e-07	8.35606e-05
Gpr83	protein_coding	3106.53	-2.05104	0.232478	-8.82251	1.11921e-18	1.03191e-15
Gm28942	lincRNA	147.119	-2.0452	0.513885	-3.97987	6.89529e-05	0.00257156
BC064078	transcribed_unprocessed_pseudogene	179.875	-2.04124	0.39062	-5.22564	1.73556e-07	1.94617e-05
Gm4017	processed_pseudogene	20.9984	-2.03278	0.619248	-3.28266	0.00102831	0.0178914
Gm3752	protein_coding	43.7396	-1.99685	0.622219	-3.20924	0.00133085	0.0211966
Itgae	protein_coding	1485.26	-1.956	0.27512	-7.10964	1.16349e-12	4.95108e-10
Rasip1	protein_coding	57.5917	-1.88731	0.374066	-5.04538	4.52615e-07	4.49543e-05
Slc9a7	protein_coding	199.374	-1.87683	0.48675	-3.85583	0.000115339	0.00380645
Otud1	protein_coding	50.0016	-1.87536	0.536903	-3.49292	0.000477775	0.0106432
Naip2	protein_coding	128.871	-1.84737	0.416548	-4.43496	9.20902e-06	0.000551686
Pi4k2b	protein_coding	46.4251	-1.83902	0.52403	-3.50939	0.000449144	0.0101692
Mtmr7	protein_coding	81.2473	-1.83074	0.491229	-3.72687	0.000193876	0.00561528
Gm11127	protein_coding	71.2385	-1.81837	0.549728	-3.30777	0.00094043	0.0168977
Gm14336	processed_pseudogene	28.2616	-1.8039	0.631612	-2.85603	0.00428975	0.0470851
H2-Bl	polymorphic_pseudogene	961.037	-1.78182	0.542945	-3.28177	0.00103156	0.0179186
Gm8543	processed_pseudogene	646.227	-1.76931	0.562883	-3.14329	0.00167059	0.0250452
Bcl2l14	protein_coding	46.4632	-1.74128	0.595854	-2.92232	0.00347431	0.0408644
Irf6	protein_coding	359.915	-1.7002	0.221761	-7.66683	1.763e-14	8.80525e-12
Gm3383	protein_coding	42.9258	-1.68392	0.508852	-3.30925	0.000935458	0.0168565
Ubtd2	protein_coding	31.3142	-1.6751	0.494161	-3.38978	0.000699491	0.0139027
Gbp3	protein_coding	1312.99	-1.66859	0.121064	-13.7827	3.23729e-43	2.6863e-39
Rps15a-ps7	processed_pseudogene	66.513	-1.65724	0.520024	-3.18686	0.00143828	0.0224038
Zfp839	protein_coding	53.8864	-1.62634	0.443657	-3.66575	0.000246612	0.00667663
Actg-ps1	processed_pseudogene	2174.58	-1.61946	0.477956	-3.38831	0.000703255	0.0139564
Gprasp1	protein_coding	583.211	-1.58598	0.1576	-10.0633	8.02559e-24	1.66491e-20
H2-Q5	polymorphic_pseudogene	11954.5	-1.57851	0.438518	-3.59966	0.000318637	0.00803662
B3gnt5	protein_coding	188.472	-1.5732	0.381304	-4.12584	3.69387e-05	0.0016423
Endod1	protein_coding	874.162	-1.57123	0.238983	-6.57466	4.87644e-11	1.39533e-08
Myo1e	protein_coding	722.638	-1.56352	0.36034	-4.339	1.43131e-05	0.000772315
Entpd1	protein_coding	674.711	-1.55728	0.271606	-5.73362	9.83116e-09	1.58406e-06
2008-09-01	protein_coding	95.9658	-1.5533	0.300152	-5.17505	2.2785e-07	2.45545e-05
Ppm1l	protein_coding	275.373	-1.54743	0.250961	-6.16601	7.00359e-10	1.68452e-07
Igsf3	protein_coding	85.5589	-1.54473	0.396278	-3.89808	9.69583e-05	0.00328392
2510009E07Rik	protein_coding	96.0663	-1.53472	0.389423	-3.94101	8.11388e-05	0.00290807
Cul7	protein_coding	110.095	-1.52158	0.283495	-5.36722	7.99573e-08	9.75715e-06
Scg5	protein_coding	41.718	-1.52116	0.493556	-3.08204	0.00205589	0.0287201
Patl2	protein_coding	46.9139	-1.5048	0.424331	-3.54628	0.000390711	0.00934328
H2-T-ps	unprocessed_pseudogene	2784.21	-1.49934	0.452061	-3.31667	0.000910984	0.0166689
Apol9b	protein_coding	514.018	-1.48599	0.243534	-6.10179	1.0489e-09	2.321e-07
Tmem121b	protein_coding	59.6031	-1.44808	0.377404	-3.83696	0.000124568	0.0040345
Gm17241	processed_pseudogene	2273.23	-1.43917	0.470138	-3.06117	0.00220476	0.0302649
Gsta4	protein_coding	208.457	-1.4323	0.242225	-5.91307	3.35788e-09	6.05732e-07
H2-Q7	protein_coding	38088.4	-1.43066	0.429089	-3.33418	0.000855502	0.0159707
Hbegf	protein_coding	40.313	-1.43049	0.478629	-2.98872	0.00280148	0.0359092
Epcam	protein_coding	425.592	-1.42705	0.363094	-3.93025	8.48585e-05	0.00300921
Gm8399	processed_pseudogene	8218.09	-1.42155	0.393794	-3.60988	0.000306336	0.00778554
Plxna3	protein_coding	90.193	-1.3984	0.433549	-3.22546	0.00125771	0.0204838
Gm1821	transcribed_processed_pseudogene	29698.3	-1.39775	0.399017	-3.50297	0.000460099	0.0103747
H2-K1	protein_coding	169234	-1.39414	0.388505	-3.58848	0.00033261	0.00835097
Ubc	protein_coding	38751	-1.38564	0.383483	-3.6133	0.000302324	0.00770716
H2-D1	protein_coding	144607	-1.38548	0.398207	-3.47929	0.000502743	0.0109352
Gm8797	protein_coding	4679.28	-1.38369	0.449943	-3.07524	0.00210331	0.029186
Irf5	protein_coding	624.791	-1.37669	0.254091	-5.41811	6.02315e-08	7.63055e-06
Colq	protein_coding	418.78	-1.37627	0.274347	-5.01654	5.26108e-07	5.04699e-05
Prelid2	protein_coding	66.7329	-1.37544	0.41616	-3.30507	0.00094952	0.0169992
Gm8464	transcribed_processed_pseudogene	391.154	-1.3569	0.360108	-3.76804	0.000164532	0.00504866
Cd38	protein_coding	601.678	-1.35688	0.254348	-5.33474	9.56828e-08	1.14241e-05
Gm26880	lincRNA	55.2814	-1.34098	0.468131	-2.86453	0.0041763	0.0462464
Ceacam15	protein_coding	47.7491	-1.33696	0.401148	-3.33282	0.000859704	0.0160131
Trav7-1	TR_V_gene	64.1934	-1.33288	0.326492	-4.08243	4.45664e-05	0.00187722
1810006J02Rik	lincRNA	93.3918	-1.32888	0.452842	-2.93452	0.00334061	0.0399717
Gm3252	protein_coding	110.223	-1.32223	0.419185	-3.15429	0.00160891	0.0243986
Ubb	protein_coding	33354.1	-1.31975	0.386491	-3.4147	0.000638513	0.012992
Ptpn5	protein_coding	264.058	-1.3172	0.437055	-3.0138	0.00257995	0.0338203
Shisa5	protein_coding	101472	-1.31118	0.26322	-4.9813	6.31585e-07	5.85575e-05
Ecm1	protein_coding	5888.52	-1.31027	0.215769	-6.07255	1.25893e-09	2.57941e-07
Id3	protein_coding	3951.24	-1.30209	0.149669	-8.6998	3.32474e-18	2.75887e-15
H2-Q6	protein_coding	18921.2	-1.29701	0.299987	-4.32357	1.53524e-05	0.000808853
Il2rb	protein_coding	23130.9	-1.2938	0.229243	-5.64381	1.66324e-08	2.50938e-06
Ccrl2	protein_coding	276.933	-1.29274	0.291445	-4.43562	9.18058e-06	0.000551686
Gm16385	processed_pseudogene	604.968	-1.26411	0.367614	-3.43869	0.000584545	0.0122799
Foxp3	protein_coding	20294.6	-1.25869	0.190792	-6.59718	4.19049e-11	1.22009e-08
Ltb	protein_coding	29414.9	-1.25684	0.250747	-5.01237	5.3763e-07	5.12787e-05
Gbp2	protein_coding	1933.24	-1.25357	0.153306	-8.17689	2.91262e-16	2.10164e-13
H2-K2	transcribed_unprocessed_pseudogene	3473.04	-1.2515	0.403317	-3.10301	0.00191561	0.0273122
Gtf3c4	protein_coding	165.038	-1.23126	0.348045	-3.53764	0.000403717	0.00949096
Gm3468	protein_coding	123.647	-1.22531	0.329686	-3.71659	0.000201933	0.00574834
Trps1	protein_coding	226.65	-1.22338	0.295049	-4.14637	3.37783e-05	0.00153585
Gm19243	processed_pseudogene	220.701	-1.20115	0.354948	-3.38402	0.000714317	0.0140961
Tbc1d4	protein_coding	2293.46	-1.19861	0.137614	-8.70989	3.04162e-18	2.65678e-15
B2m	protein_coding	128311	-1.19842	0.303089	-3.95403	7.68467e-05	0.00280066
Mdfic	protein_coding	342.728	-1.187	0.357691	-3.31852	0.000904966	0.0165954
Gm17782	unprocessed_pseudogene	1642.14	-1.1845	0.305492	-3.87737	0.00010559	0.00354015
Apol9a	protein_coding	346.842	-1.18158	0.244219	-4.83821	1.31011e-06	0.000108172
Txnip	protein_coding	13537.4	-1.18066	0.26496	-4.456	8.35039e-06	0.000515179
Gm12715	processed_pseudogene	11574.9	-1.18037	0.301907	-3.9097	9.24121e-05	0.00320008
Gm8909	protein_coding	4547.58	-1.17926	0.298268	-3.9537	7.69522e-05	0.00280066
Gm43584	processed_transcript	148.699	-1.17883	0.309454	-3.80937	0.00013932	0.00445501
Acsbg1	protein_coding	1016.28	-1.17874	0.264295	-4.45993	8.1986e-06	0.000509603
Ikzf2	protein_coding	2664.88	-1.17055	0.0907185	-12.9031	4.32335e-38	1.435e-34
Acta1	protein_coding	623.747	-1.16972	0.328953	-3.55587	0.000376724	0.00912717
Gm10406	protein_coding	62.1301	-1.15766	0.38692	-2.99198	0.00277171	0.0357373
Zfp28	protein_coding	207.464	-1.15511	0.259493	-4.4514	8.53142e-06	0.000522423
Osbpl3	protein_coding	976.15	-1.14588	0.205592	-5.57355	2.49594e-08	3.51039e-06
Gm13604	processed_pseudogene	306.545	-1.14475	0.344207	-3.32575	0.000881806	0.0162786
Gm49594	processed_pseudogene	149.4	-1.1351	0.371523	-3.05525	0.00224872	0.0305457
Gm30054	antisense	250.512	-1.13421	0.219711	-5.16229	2.43945e-07	2.5952e-05
Tnfrsf9	protein_coding	4705.48	-1.12996	0.165758	-6.81694	9.30001e-12	3.14985e-09
Ndrg1	protein_coding	382.476	-1.12924	0.288222	-3.91793	8.9311e-05	0.00311388
Tns1	protein_coding	332.406	-1.12388	0.360505	-3.11752	0.00182381	0.0264118
Sorbs1	protein_coding	272.356	-1.12344	0.20685	-5.43118	5.5984e-08	7.147e-06
Gm5586	processed_pseudogene	1553.41	-1.1226	0.335214	-3.34891	0.0008113	0.0153702
Cd1d2	polymorphic_pseudogene	486.114	-1.12168	0.17267	-6.49611	8.2422e-11	2.27979e-08
Maged2	protein_coding	299.069	-1.11758	0.383155	-2.91678	0.00353669	0.0413928
Rps19-ps3	processed_pseudogene	632.435	-1.11492	0.391049	-2.85111	0.00435669	0.0475995
Gm19246	processed_pseudogene	1251.85	-1.1061	0.342789	-3.22678	0.00125193	0.0204298
Gm10925	unprocessed_pseudogene	86899.9	-1.10424	0.303255	-3.64128	0.000271282	0.00710125
Lrrc32	protein_coding	6013.57	-1.10268	0.14307	-7.70728	1.28523e-14	6.88056e-12
Fitm2	protein_coding	105.764	-1.10205	0.259482	-4.2471	2.16556e-05	0.00106646
Actg1	protein_coding	13827.6	-1.10015	0.2933	-3.75094	0.000176174	0.00528712
Gm9574	unprocessed_pseudogene	557.069	-1.09893	0.292928	-3.75155	0.000175747	0.00528386
Gm7331	processed_pseudogene	245.366	-1.09531	0.368612	-2.97145	0.00296393	0.0368736
Nrp1	protein_coding	3704.05	-1.09519	0.120135	-9.11637	7.76817e-20	9.20861e-17
Ly6e	protein_coding	70536	-1.09455	0.285726	-3.83078	0.000127737	0.00411635
Coro1a	protein_coding	68426.6	-1.08014	0.264862	-4.07812	4.54013e-05	0.00189793
mt-Cytb	protein_coding	72067	-1.07871	0.270193	-3.99236	6.54199e-05	0.00247046
Cst7	protein_coding	1302.52	-1.07722	0.259994	-4.14327	3.42386e-05	0.0015486
Cyth4	protein_coding	8183.44	-1.07302	0.18487	-5.80418	6.46817e-09	1.0843e-06
Rps27rt	protein_coding	9029.99	-1.07109	0.331123	-3.23471	0.00121764	0.0200601
Rcn1	protein_coding	873.038	-1.06647	0.175357	-6.08168	1.18928e-09	2.49839e-07
Actb	protein_coding	353601	-1.06354	0.308744	-3.44472	0.000571647	0.0120592
Arf2	protein_coding	275.023	-1.06038	0.286717	-3.69836	0.000216995	0.00611392
Slc35d1	protein_coding	611.959	-1.05975	0.193157	-5.48648	4.10026e-08	5.44383e-06
Cerk	protein_coding	481.078	-1.05803	0.317715	-3.33014	0.000868038	0.016096
Ctsw	protein_coding	2136.72	-1.05604	0.193012	-5.47137	4.46561e-08	5.88185e-06
Cd96	protein_coding	5249.01	-1.05199	0.135217	-7.78001	7.25207e-15	4.15018e-12
Pfn1	protein_coding	54704.8	-1.0484	0.306641	-3.41898	0.000628567	0.0128469
Gm17541	processed_pseudogene	888.57	-1.04417	0.340271	-3.06866	0.00215024	0.0296883
Nmb	protein_coding	225.86	-1.04379	0.266024	-3.92367	8.7211e-05	0.00305994
Ighm	IG_C_gene	23033.4	-1.0435	0.226468	-4.60769	4.07161e-06	0.000285116
Rps27	protein_coding	25429.2	-1.04306	0.320778	-3.25165	0.00114737	0.019371
Arhgap18	protein_coding	516.122	-1.03223	0.16936	-6.09489	1.09516e-09	2.39148e-07
H2-Q10	protein_coding	1518.41	-1.0309	0.29079	-3.54516	0.000392371	0.00936949
Gm13341	unprocessed_pseudogene	5252.5	-1.0303	0.286338	-3.59819	0.000320436	0.00806972
Ggt7	protein_coding	226.387	-1.02657	0.328654	-3.12356	0.00178678	0.0260804
mt-Co1	protein_coding	72596.9	-1.02637	0.280632	-3.65736	0.000254828	0.00681178
Gm5312	processed_pseudogene	629.819	-1.02626	0.307603	-3.33631	0.000848975	0.0159204
Gm3739	protein_coding	137.134	-1.02548	0.283101	-3.6223	0.000291993	0.00751304
Gm28661	unprocessed_pseudogene	26852.7	-1.02381	0.290952	-3.51883	0.000433452	0.00997721
Tgtp1	protein_coding	5500.59	-1.02271	0.202532	-5.04959	4.42765e-07	4.42658e-05
Syde1	protein_coding	95.0893	-1.02088	0.320961	-3.1807	0.00146917	0.0227664
Gm15536	processed_pseudogene	685.664	-1.01704	0.350615	-2.90073	0.003723	0.0426585
Gm28437	unprocessed_pseudogene	57118.1	-1.0163	0.296106	-3.43221	0.000598673	0.012458
H2-T23	protein_coding	14236.6	-1.01597	0.29143	-3.48615	0.000490035	0.0108003
Cnn3	protein_coding	405.962	-1.01526	0.165764	-6.12473	9.08364e-10	2.0651e-07
Gm7776	processed_pseudogene	182.331	-1.01485	0.291417	-3.48246	0.00049682	0.010849
Gm42031	lincRNA	200.35	-1.01317	0.354915	-2.85468	0.00430801	0.0472056
Arhgdib	protein_coding	33474.8	-1.01196	0.26991	-3.74927	0.000177353	0.00531045
Gm6394	processed_pseudogene	745.079	-1.00775	0.301578	-3.3416	0.000832977	0.0156914
Cd81	protein_coding	2347.47	-1.00729	0.165469	-6.0875	1.14689e-09	2.46078e-07
Gm37486	processed_pseudogene	256.33	-1.00642	0.338089	-2.97678	0.00291296	0.0364353
Tgtp2	protein_coding	5406.95	-1.00476	0.214438	-4.68556	2.792e-06	0.000207785
Ctla4	protein_coding	6330.29	-1.00367	0.149658	-6.70644	1.99432e-11	6.29829e-09
AC158975.2	lincRNA	97.1823	-1.00255	0.306645	-3.26941	0.00107772	0.0185346
Socs1	protein_coding	3689.94	-1.00254	0.208518	-4.80794	1.52497e-06	0.000123456
Arhgap20	protein_coding	186.517	-1.00163	0.225604	-4.43977	9.00555e-06	0.000544568
Gm13493	processed_pseudogene	1848.23	-0.998139	0.328289	-3.04043	0.00236241	0.0316809
Gm12094	processed_pseudogene	302.816	-0.993936	0.340625	-2.91797	0.00352315	0.0412634
Gm29216	unprocessed_pseudogene	47233.6	-0.991979	0.286613	-3.46104	0.000538095	0.0115527
Gm13340	unprocessed_pseudogene	18829.5	-0.987846	0.278323	-3.54928	0.000386292	0.00929117
Gtf2f2	protein_coding	611.407	-0.986594	0.270447	-3.64801	0.000264277	0.00696013
Ucp2	protein_coding	34867.3	-0.986175	0.304889	-3.23454	0.0012184	0.0200601
Gm12183	processed_pseudogene	9684.01	-0.981411	0.215169	-4.56112	5.08807e-06	0.000336421
Trbv12-1	TR_V_gene	550.315	-0.980413	0.138697	-7.06876	1.56328e-12	6.17721e-10
Gm6375	processed_pseudogene	318.581	-0.979145	0.3344	-2.92807	0.00341079	0.0404036
Gm4617	processed_pseudogene	853.048	-0.978507	0.29648	-3.30042	0.000965414	0.017191
Fah	protein_coding	146.88	-0.976884	0.314525	-3.1059	0.00189698	0.02707
Gm6485	transcribed_processed_pseudogene	639.425	-0.976758	0.287177	-3.40124	0.000670807	0.0134779
Sdc4	protein_coding	1525.89	-0.972964	0.17687	-5.501	3.77634e-08	5.0542e-06
Cd79b	protein_coding	306.313	-0.9727	0.293685	-3.31205	0.000926149	0.0167778
E2f2	protein_coding	909.573	-0.971686	0.160566	-6.05162	1.43401e-09	2.90229e-07
Gm8815	unprocessed_pseudogene	292.087	-0.967317	0.309223	-3.12821	0.00175873	0.0258071
Slc14a1	protein_coding	1502.22	-0.966868	0.165432	-5.84452	5.08039e-09	8.78272e-07
Rps11-ps1	processed_pseudogene	1638.16	-0.96628	0.309627	-3.12079	0.00180367	0.0262346
Gm1848	processed_pseudogene	1103.94	-0.964559	0.263735	-3.6573	0.000254887	0.00681178
Malat1	lincRNA	18945.6	-0.963023	0.294514	-3.26987	0.00107596	0.0185235
Usp31	protein_coding	84.8736	-0.956054	0.324594	-2.94538	0.00322556	0.0389602
Spry1	protein_coding	168.337	-0.953672	0.300537	-3.17323	0.00150755	0.0232955
Ptma	protein_coding	11811	-0.952859	0.269877	-3.53072	0.000414436	0.00964654
Cdc25b	protein_coding	1338.63	-0.951492	0.237926	-3.9991	6.35825e-05	0.00243137
Swap70	protein_coding	1110.11	-0.948222	0.17452	-5.43332	5.53152e-08	7.11637e-06
Gm26623	lincRNA	450.933	-0.948188	0.278184	-3.40849	0.000653225	0.0132206
Fau	protein_coding	18840	-0.947272	0.323423	-2.92889	0.00340174	0.0404036
Gm10132	processed_pseudogene	515.756	-0.942569	0.319928	-2.94619	0.00321714	0.0389152
Tnfrsf18	protein_coding	7327.42	-0.938447	0.210858	-4.45062	8.56225e-06	0.000522423
Arrdc3	protein_coding	639.25	-0.938088	0.256672	-3.65481	0.000257369	0.00684502
Prickle1	protein_coding	177.856	-0.935889	0.313697	-2.98342	0.00285051	0.0361509
Samhd1	protein_coding	11224.8	-0.935729	0.187206	-4.99839	5.78114e-07	5.4825e-05
Gm15427	processed_pseudogene	15664.4	-0.933536	0.312838	-2.98408	0.00284429	0.0361509
Ddx5	protein_coding	68570.9	-0.933303	0.208752	-4.47088	7.78989e-06	0.000486019
Gm13408	processed_pseudogene	1648.55	-0.933256	0.313296	-2.97883	0.00289348	0.0364139
Gm10288	processed_pseudogene	534.612	-0.933169	0.329546	-2.83168	0.00463044	0.0494191
Arhgap5	protein_coding	312.501	-0.931651	0.298321	-3.12298	0.00179032	0.0260884
Gm8326	processed_pseudogene	135.57	-0.930514	0.307009	-3.0309	0.00243823	0.0324306
Limd2	protein_coding	31041.5	-0.928432	0.262027	-3.54326	0.000395208	0.0094101
Cd99l2	protein_coding	328.26	-0.925476	0.263544	-3.51166	0.000445321	0.010124
Klf13	protein_coding	11298.9	-0.919547	0.254832	-3.60844	0.000308044	0.00781696
Gm9800	processed_pseudogene	1816.31	-0.91845	0.27866	-3.29595	0.00098091	0.0173552
Arhgap31	protein_coding	879.68	-0.913927	0.219556	-4.16261	3.14625e-05	0.00146672
Rpl18a	protein_coding	20249.3	-0.910478	0.3135	-2.90424	0.00368151	0.0424861
Irf8	protein_coding	697.409	-0.910061	0.187453	-4.85486	1.2047e-06	0.000102529
Crip1	protein_coding	6077.06	-0.908074	0.299706	-3.02988	0.00244653	0.0325081
Cd2	protein_coding	16452	-0.905489	0.233912	-3.87107	0.000108358	0.00361106
Gm4977	processed_pseudogene	2537.49	-0.905138	0.319568	-2.83238	0.00462033	0.0493513
Cd52	protein_coding	17351.6	-0.899356	0.268009	-3.3557	0.000791649	0.0151711
Tapbp	protein_coding	12746.7	-0.896182	0.172582	-5.1928	2.07158e-07	2.28902e-05
Gm6170	processed_pseudogene	10844	-0.895617	0.305079	-2.93569	0.00332806	0.0398503
Ldhb	protein_coding	1171.83	-0.89437	0.170718	-5.23889	1.61549e-07	1.84901e-05
Fth1	protein_coding	18045	-0.894	0.241754	-3.69798	0.000217323	0.00611392
Zscan29	protein_coding	970.64	-0.890408	0.269935	-3.29861	0.000971657	0.0172365
Cnn2	protein_coding	23338.2	-0.889539	0.220942	-4.02611	5.67062e-05	0.00224605
Slc25a24	protein_coding	429.465	-0.888214	0.238162	-3.72945	0.000191896	0.00558336
Peli1	protein_coding	9667.28	-0.887678	0.171217	-5.18452	2.1657e-07	2.3646e-05
Ndfip1	protein_coding	12860.8	-0.885692	0.215731	-4.10554	4.03377e-05	0.00175247
Cnbp	protein_coding	20812	-0.881797	0.226131	-3.89949	9.63965e-05	0.00327157
Gm13624	processed_pseudogene	68.0556	-0.880817	0.283592	-3.10592	0.00189685	0.02707
Gm47469	lincRNA	121.463	-0.877218	0.215746	-4.06598	4.78308e-05	0.00197463
Rps11	protein_coding	11253.6	-0.87579	0.289712	-3.02297	0.00250305	0.033022
Zfyve16	protein_coding	285.522	-0.87418	0.267937	-3.26263	0.00110385	0.0188706
Fam49a	protein_coding	692.511	-0.873793	0.126108	-6.92894	4.24001e-12	1.63645e-09
Igtp	protein_coding	7789.03	-0.871714	0.174502	-4.99543	5.87061e-07	5.53572e-05
Gm5869	processed_pseudogene	12297.3	-0.871286	0.306905	-2.83894	0.00452635	0.0489058
Eef1a1	protein_coding	90266.3	-0.869078	0.306987	-2.831	0.00464033	0.0494352
Gm43305	processed_transcript	404.859	-0.867698	0.223396	-3.88413	0.000102697	0.00345714
Gm13456	processed_pseudogene	5991.99	-0.867414	0.299639	-2.89486	0.00379328	0.0432011
Rpl36-ps3	processed_pseudogene	922.691	-0.867081	0.298562	-2.90419	0.00368205	0.0424861
Atp1b3	protein_coding	19759.2	-0.866124	0.254564	-3.40238	0.000668012	0.0134543
Pear1	protein_coding	1938.83	-0.864043	0.156281	-5.52878	3.22466e-08	4.3866e-06
Psme1	protein_coding	9270.23	-0.863303	0.226748	-3.80732	0.00014048	0.0044663
AC133509.1	processed_pseudogene	5295.87	-0.86243	0.301179	-2.86351	0.00418976	0.0463555
Castor2	protein_coding	375.508	-0.857344	0.29311	-2.92499	0.0034447	0.0406313
Arhgap45	protein_coding	26356.1	-0.856801	0.184675	-4.63952	3.49223e-06	0.000248743
Sell	protein_coding	21628.9	-0.856103	0.241717	-3.54176	0.000397474	0.0094101
Fcrl1	protein_coding	390.692	-0.856093	0.255626	-3.34901	0.000811	0.0153702
Cox7a2l	protein_coding	4678.37	-0.853635	0.241408	-3.53607	0.000406121	0.00952157
Rnf216	protein_coding	758.508	-0.852395	0.168068	-5.07172	3.94232e-07	3.96526e-05
Gm7803	processed_pseudogene	1775.57	-0.851929	0.216197	-3.94052	8.13055e-05	0.00290807
Gnb1	protein_coding	5726.74	-0.850938	0.25532	-3.33283	0.00085968	0.0160131
Eno1b	protein_coding	1127.02	-0.850613	0.251063	-3.38805	0.000703911	0.0139564
Erbb3	protein_coding	226.766	-0.850397	0.271549	-3.13165	0.00173827	0.0256789
Ftl1-ps1	protein_coding	2302.75	-0.84981	0.291024	-2.92007	0.0034995	0.0410443
Cfl1	protein_coding	47954.6	-0.848818	0.282455	-3.00514	0.00265458	0.0345783
Hmgn2	protein_coding	2081.99	-0.848072	0.250336	-3.38774	0.000704716	0.0139564
mt-Nd1	protein_coding	40255.9	-0.845724	0.272616	-3.10225	0.00192054	0.0273149
Gm4202	processed_pseudogene	2876.17	-0.844969	0.271668	-3.1103	0.001869	0.0268169
Anxa5	protein_coding	1935.67	-0.844644	0.138781	-6.08615	1.15655e-09	2.46078e-07
Sgpp1	protein_coding	451.847	-0.844295	0.17975	-4.69704	2.63955e-06	0.000197324
Hspa4l	protein_coding	357.805	-0.843871	0.242121	-3.48532	0.000491546	0.0108076
mt-Nd4	protein_coding	32456.9	-0.843569	0.246423	-3.42326	0.000618749	0.0127113
Ftl1	protein_coding	4627.58	-0.842315	0.263529	-3.19629	0.00139206	0.0218983
Gm6430	processed_pseudogene	1213.43	-0.842121	0.233838	-3.6013	0.000316636	0.0079983
Tubb2b	protein_coding	187.378	-0.841199	0.270357	-3.11143	0.00186182	0.0267637
Rac2	protein_coding	38232.7	-0.840807	0.240931	-3.48983	0.000483322	0.0107092
Slfn4	protein_coding	177.307	-0.840595	0.267034	-3.14789	0.00164453	0.0247889
Coro2a	protein_coding	2609.59	-0.840582	0.155519	-5.40501	6.48033e-08	8.14754e-06
Ms4a6b	protein_coding	24699.1	-0.839999	0.243017	-3.45654	0.000547154	0.0116867
Tiam1	protein_coding	438.39	-0.839844	0.183069	-4.58758	4.48421e-06	0.000305
Gm6969	processed_pseudogene	519.069	-0.839411	0.292997	-2.86491	0.00417123	0.0462464
Ephb6	protein_coding	1133.71	-0.838651	0.152392	-5.50324	3.72877e-08	5.03111e-06
Gm12435	processed_pseudogene	1422.89	-0.835305	0.217716	-3.83668	0.000124711	0.0040345
Gm11793	processed_pseudogene	1314.48	-0.834893	0.207641	-4.02084	5.7991e-05	0.00228603
Gm6180	processed_pseudogene	3750.41	-0.832518	0.282196	-2.95014	0.00317634	0.038666
Gpsm1	protein_coding	199.323	-0.8318	0.291038	-2.85804	0.00426264	0.0469116
Sh3bgrl3	protein_coding	8415.41	-0.830676	0.25031	-3.31858	0.00090475	0.0165954
Trbc1	TR_C_gene	10530.7	-0.830151	0.243396	-3.4107	0.000647974	0.0131464
Gm4735	processed_pseudogene	3235.63	-0.82899	0.245707	-3.37389	0.00074114	0.0144431
Slfn8	protein_coding	2716.12	-0.828367	0.21757	-3.80736	0.000140458	0.0044663
Irf1	protein_coding	7277.49	-0.827503	0.161957	-5.10942	3.23157e-07	3.31057e-05
Usp11	protein_coding	286.328	-0.825091	0.232322	-3.5515	0.000383038	0.00923802
Ms4a6c	protein_coding	898.125	-0.82503	0.288468	-2.86004	0.00423586	0.0467098
Map7	protein_coding	232.78	-0.824692	0.192493	-4.28427	1.83339e-05	0.00093334
Smpdl3a	protein_coding	4093.19	-0.824468	0.153831	-5.35959	8.34129e-08	1.01045e-05
Ctss	protein_coding	8750.66	-0.824396	0.190408	-4.32962	1.49367e-05	0.000794515
H3f3b	protein_coding	18917.1	-0.823764	0.238227	-3.45789	0.000544423	0.0116434
Sqor	protein_coding	284.73	-0.821196	0.210268	-3.90547	9.40415e-05	0.00323129
Gpx4-ps2	transcribed_processed_pseudogene	1614.77	-0.820468	0.20751	-3.95387	7.68965e-05	0.00280066
Slc41a3	protein_coding	318.015	-0.81826	0.199622	-4.09904	4.14861e-05	0.00179766
Hnrnpf	protein_coding	8045.41	-0.816998	0.215581	-3.78975	0.000150797	0.00473086
Gbp10	protein_coding	1287.61	-0.815639	0.215288	-3.7886	0.000151499	0.00474392
Gm10054	processed_pseudogene	442.805	-0.815055	0.285229	-2.85755	0.00426925	0.0469222
Mcub	protein_coding	454.122	-0.813255	0.203502	-3.9963	6.43391e-05	0.00245465
Eno1	protein_coding	11652.6	-0.812211	0.23646	-3.43487	0.000592828	0.0124068
mt-Nd4l	protein_coding	5219.72	-0.806685	0.244502	-3.2993	0.000969275	0.0172365
Cnp	protein_coding	7696.12	-0.802453	0.193229	-4.15286	3.28349e-05	0.0015095
Fmo5	protein_coding	317.284	-0.802284	0.262387	-3.05763	0.00223095	0.0304481
Rgs1	protein_coding	6525.71	-0.80206	0.220228	-3.64194	0.000270586	0.00709424
Gm3226	processed_pseudogene	1158.39	-0.79994	0.245478	-3.25871	0.00111922	0.0190313
Osgepl1	protein_coding	155.793	-0.798909	0.268246	-2.97827	0.00289878	0.036418
Gbp7	protein_coding	3189	-0.797759	0.130577	-6.10948	9.99568e-10	2.24173e-07
H2-Ob	protein_coding	1224.54	-0.797241	0.131235	-6.07489	1.24069e-09	2.57382e-07
Psmb8	protein_coding	9030.41	-0.79305	0.228634	-3.46864	0.000523096	0.0112744
Frmd6	protein_coding	689.781	-0.792153	0.276676	-2.8631	0.00419512	0.0463839
Serp1	protein_coding	5516.29	-0.785946	0.140524	-5.59298	2.23211e-08	3.22123e-06
Prmt2	protein_coding	371.067	-0.784488	0.177934	-4.40888	1.03906e-05	0.000602947
Lsp1	protein_coding	16796.1	-0.784279	0.236838	-3.31146	0.000928105	0.0167787
Tspan32	protein_coding	10379.5	-0.783839	0.174907	-4.48147	7.41313e-06	0.000471373
Gm14970	processed_pseudogene	928.786	-0.783765	0.231815	-3.38099	0.00072224	0.0142355
Il2ra	protein_coding	7442.93	-0.783523	0.102504	-7.6438	2.10902e-14	1.00004e-11
Slfn2	protein_coding	13287.6	-0.782607	0.20061	-3.90113	9.57444e-05	0.00326536
Stx5a	protein_coding	2618.95	-0.782308	0.195114	-4.00949	6.08496e-05	0.00235398
Ephx1	protein_coding	2948.16	-0.781343	0.110059	-7.09931	1.25379e-12	5.07509e-10
Tuba1a	protein_coding	1560.64	-0.781177	0.216279	-3.61189	0.000303974	0.00773734
Fxyd5	protein_coding	14500.9	-0.780556	0.23696	-3.29404	0.000987592	0.0173992
Dnmbp	protein_coding	194.849	-0.776568	0.268083	-2.89675	0.00377054	0.0430371
Gm12844	processed_pseudogene	557.137	-0.775658	0.248053	-3.12699	0.00176607	0.0258691
Cd7	protein_coding	612.759	-0.774032	0.176375	-4.38855	1.1411e-05	0.00064634
H2afz	protein_coding	5279.08	-0.77347	0.269989	-2.86482	0.00417244	0.0462464
Map3k1	protein_coding	2690.36	-0.772068	0.199315	-3.87361	0.000107233	0.00358077
Gm14085	protein_coding	1438.66	-0.77135	0.175362	-4.39862	1.0894e-05	0.000625741
Gpx4	protein_coding	3472.96	-0.7711	0.185966	-4.14647	3.37646e-05	0.00153585
Litaf	protein_coding	378.534	-0.76729	0.181725	-4.22227	2.41855e-05	0.00117364
Gm3756	processed_pseudogene	949.436	-0.76306	0.242449	-3.1473	0.00164785	0.0247939
Gm12185	protein_coding	308.994	-0.761853	0.203219	-3.74893	0.000177591	0.00531045
Gm7446	processed_pseudogene	676.108	-0.761732	0.240383	-3.16882	0.0015306	0.0234649
Tmbim6	protein_coding	14060.1	-0.761063	0.186041	-4.09083	4.29841e-05	0.00183323
Slc2a3	protein_coding	1753.4	-0.759356	0.111253	-6.82548	8.76302e-12	3.02981e-09
Zc3h12d	protein_coding	833.162	-0.759331	0.13546	-5.60559	2.07549e-08	3.02148e-06
Laptm5	protein_coding	47957.5	-0.759007	0.24535	-3.09357	0.00197767	0.0279331
Dgka	protein_coding	18022.5	-0.756351	0.165089	-4.58146	4.61734e-06	0.000311501
Pqlc3	protein_coding	821.475	-0.756312	0.204249	-3.70289	0.00021316	0.00604718
Trim59	protein_coding	3089.75	-0.755883	0.164663	-4.59047	4.42248e-06	0.000303677
Cacna2d4	protein_coding	424.077	-0.755805	0.21657	-3.48988	0.000483231	0.0107092
Selplg	protein_coding	16251.5	-0.750816	0.220205	-3.40963	0.000650511	0.0131818
AC122253.3	processed_pseudogene	122.181	-0.750528	0.252904	-2.96764	0.00300093	0.0371946
Dok2	protein_coding	6143.8	-0.750004	0.227002	-3.30395	0.000953336	0.0170308
BC043934	lincRNA	320.629	-0.749903	0.23666	-3.1687	0.00153124	0.0234649
Trbv5	TR_V_gene	129.135	-0.749538	0.23281	-3.21952	0.00128404	0.0207093
Stat1	protein_coding	4652.25	-0.749118	0.135488	-5.52902	3.22022e-08	4.3866e-06
Chchd10	protein_coding	1033.08	-0.748864	0.133118	-5.62556	1.84906e-08	2.7646e-06
Zfp442	protein_coding	161.317	-0.747629	0.257471	-2.90374	0.00368732	0.0424963
Cast	protein_coding	5183.99	-0.745692	0.147861	-5.04321	4.57777e-07	4.49543e-05
Mov10	protein_coding	1204.9	-0.745391	0.167611	-4.44715	8.70155e-06	0.000528978
Itm2b	protein_coding	26292.6	-0.744158	0.236095	-3.15195	0.00162186	0.024514
Itgb7	protein_coding	25629.1	-0.743336	0.213701	-3.47839	0.000504436	0.0109576
AW112010	lincRNA	8734.82	-0.742627	0.212769	-3.4903	0.000482479	0.0107092
Zbtb5	protein_coding	225.634	-0.7416	0.248062	-2.98958	0.00279362	0.0358847
Gm11407	processed_pseudogene	328.775	-0.741199	0.246662	-3.00492	0.0026565	0.0345783
Bin2	protein_coding	13452	-0.737354	0.164895	-4.47165	7.76177e-06	0.000486019
Lat	protein_coding	18201.2	-0.736483	0.22593	-3.25978	0.00111497	0.0189785
Tmem123	protein_coding	8330.48	-0.735116	0.171169	-4.29468	1.74947e-05	0.000901684
Izumo1r	protein_coding	12244.6	-0.732289	0.178915	-4.09294	4.25944e-05	0.00182661
Pibf1	protein_coding	271.463	-0.731537	0.25753	-2.84058	0.00450313	0.0488457
Myl12a	protein_coding	3742.61	-0.730036	0.24225	-3.01357	0.00258197	0.0338203
Hspa8	protein_coding	18985	-0.727146	0.246664	-2.94792	0.00319918	0.0387828
Gm6428	processed_pseudogene	332.713	-0.726915	0.243647	-2.98348	0.00284992	0.0361509
Cd83	protein_coding	4948.6	-0.723504	0.149222	-4.84851	1.24395e-06	0.000103842
Natd1	protein_coding	452.805	-0.722383	0.249046	-2.9006	0.00372452	0.0426585
Oaz2-ps	processed_pseudogene	212.013	-0.722289	0.234141	-3.08484	0.00203661	0.0285469
Gm12250	processed_pseudogene	1291.79	-0.72143	0.156158	-4.61987	3.83975e-06	0.000270019
Cbfa2t2	protein_coding	485.81	-0.719183	0.170166	-4.22636	2.37499e-05	0.00115587
AI467606	protein_coding	8085.22	-0.718642	0.167629	-4.28709	1.81029e-05	0.00092727
Slc9a3r1	protein_coding	6508.8	-0.718342	0.183715	-3.91008	9.22638e-05	0.00320008
Rhoh	protein_coding	10837	-0.716458	0.165541	-4.32797	1.50488e-05	0.000797923
Baiap2	protein_coding	386.37	-0.715148	0.21205	-3.37255	0.000744751	0.0144729
Srgn	protein_coding	12200.3	-0.712704	0.220819	-3.22755	0.00124857	0.0204298
Capn3	protein_coding	767.173	-0.712186	0.193716	-3.67645	0.000236505	0.00644506
Itm2c	protein_coding	7867.4	-0.710895	0.151784	-4.68358	2.81905e-06	0.000208862
Atp5c1	protein_coding	5755.12	-0.710239	0.223962	-3.17125	0.00151787	0.023355
Gabarap	protein_coding	4806.83	-0.70859	0.206996	-3.42321	0.000618869	0.0127113
Lad1	protein_coding	737.152	-0.708484	0.241702	-2.93123	0.00337624	0.040224
Kdm1b	protein_coding	743.908	-0.705989	0.22546	-3.13133	0.00174019	0.0256789
Ypel5	protein_coding	2024.62	-0.705367	0.135862	-5.1918	2.08268e-07	2.28902e-05
Cmpk2	protein_coding	460.567	-0.70496	0.244517	-2.88307	0.00393814	0.0443702
Lck	protein_coding	25805.2	-0.703584	0.200247	-3.51357	0.000442124	0.0100836
Rbm3-ps	processed_pseudogene	399.842	-0.703549	0.210643	-3.34	0.000837773	0.0157346
Selenop	protein_coding	2388.35	-0.702636	0.0958502	-7.33056	2.29195e-13	1.02803e-10
Pglyrp1	protein_coding	836.684	-0.702	0.224464	-3.12745	0.00176328	0.025851
Tmem173	protein_coding	7110.71	-0.69946	0.139225	-5.02396	5.06162e-07	4.88388e-05
Psmb10	protein_coding	2935.2	-0.699386	0.173021	-4.04219	5.29538e-05	0.00213825
Cdk2ap2	protein_coding	10186.8	-0.697682	0.221673	-3.14735	0.00164757	0.0247939
Capn2	protein_coding	2090.82	-0.696396	0.116651	-5.96988	2.37425e-09	4.47763e-07
Gimap3	protein_coding	40279.7	-0.694928	0.223999	-3.10237	0.00191978	0.0273149
Stat5a	protein_coding	2538.93	-0.692486	0.12321	-5.62035	1.90573e-08	2.82388e-06
Tpm3	protein_coding	13748.3	-0.692067	0.213903	-3.23543	0.00121461	0.0200601
Sco1	protein_coding	250.952	-0.691883	0.172127	-4.01961	5.8294e-05	0.00229253
Ssbp2	protein_coding	1218.56	-0.691546	0.147028	-4.70349	2.55755e-06	0.000193237
Nfkbia	protein_coding	11507.5	-0.690981	0.184725	-3.74059	0.000183591	0.00540225
Trav12n-2	TR_V_gene	128.584	-0.690744	0.240717	-2.86953	0.00411085	0.0458492
Rgs2	protein_coding	657.264	-0.690634	0.243219	-2.83956	0.00451757	0.0489058
Gch1	protein_coding	335.633	-0.690563	0.213781	-3.23023	0.00123689	0.0203041
Atp5b	protein_coding	21109.9	-0.688715	0.231096	-2.98021	0.00288052	0.036326
Apobec1	protein_coding	308.24	-0.688659	0.214514	-3.21032	0.00132587	0.0211966
Il16	protein_coding	6765.52	-0.686268	0.149012	-4.60544	4.11593e-06	0.000287008
Arhgdia	protein_coding	13135.8	-0.686023	0.199802	-3.43352	0.0005958	0.012422
Gm47586	TEC	210.317	-0.685567	0.201246	-3.4066	0.000657764	0.0132808
Dusp4	protein_coding	278.006	-0.685192	0.212811	-3.21972	0.00128316	0.0207093
Cd200	protein_coding	1141.99	-0.684052	0.239113	-2.86079	0.00422587	0.0466306
Dusp2	protein_coding	7069.07	-0.683861	0.142709	-4.79198	1.65141e-06	0.000130508
Hmgn1	protein_coding	1205.68	-0.683827	0.179641	-3.80663	0.000140875	0.0044703
Ppp1r16a	protein_coding	558.425	-0.681584	0.208518	-3.26872	0.00108037	0.018556
Btg2	protein_coding	5309.18	-0.681236	0.149659	-4.55192	5.31577e-06	0.000349361
Gbp11	polymorphic_pseudogene	227.492	-0.680408	0.218274	-3.11723	0.00182561	0.0264149
Gm4076	processed_pseudogene	251.598	-0.679235	0.222321	-3.05519	0.00224915	0.0305457
Cd27	protein_coding	10052.2	-0.676924	0.136397	-4.9629	6.94494e-07	6.29826e-05
Tspan3	protein_coding	1117.38	-0.67232	0.111426	-6.03377	1.60174e-09	3.12734e-07
Tnfrsf4	protein_coding	8806.52	-0.672304	0.178025	-3.77646	0.000159074	0.00494379
Ywhaz	protein_coding	19010.8	-0.671821	0.2329	-2.88459	0.00391926	0.0442176
Il4ra	protein_coding	5378.59	-0.671806	0.161424	-4.16174	3.15826e-05	0.00146819
Nop53	protein_coding	7173.85	-0.670835	0.218608	-3.06866	0.00215018	0.0296883
Gm7592	transcribed_unprocessed_pseudogene	227.447	-0.6689	0.20582	-3.24993	0.00115433	0.0194293
Cdc42se2	protein_coding	9976.46	-0.666925	0.14394	-4.63337	3.59761e-06	0.000255153
Msn	protein_coding	26010.7	-0.665836	0.194476	-3.42375	0.00061764	0.0127113
2009-09-01	protein_coding	11909.5	-0.664562	0.16252	-4.08912	4.33012e-05	0.00183323
Gvin1	protein_coding	1630.81	-0.663442	0.164898	-4.02335	5.7376e-05	0.00226717
Cdc42	protein_coding	16108.5	-0.659855	0.220916	-2.9869	0.00281821	0.0359092
Prrc1	protein_coding	430.266	-0.659008	0.190828	-3.45341	0.000553539	0.0117518
Smc4	protein_coding	15231.2	-0.658262	0.164795	-3.99442	6.48532e-05	0.00246294
Gm5620	processed_pseudogene	1336.53	-0.657882	0.213488	-3.08159	0.00205899	0.0287392
Ift80	protein_coding	4179.57	-0.656829	0.143809	-4.56736	4.93913e-06	0.000329196
Bmyc	protein_coding	422.329	-0.656618	0.175387	-3.74382	0.000181241	0.00535208
Itgb2	protein_coding	13148.5	-0.656211	0.184034	-3.56571	0.000362866	0.00889884
Spcs2	protein_coding	6591.09	-0.654784	0.17897	-3.65863	0.000253566	0.00680935
mt-Nd5	protein_coding	21050.3	-0.654665	0.201973	-3.24135	0.00118964	0.0198028
Snx3	protein_coding	4446.5	-0.652376	0.184677	-3.53252	0.000411623	0.00959451
Prpsap2	protein_coding	340.256	-0.651335	0.203625	-3.1987	0.00138047	0.0218194
Tap1	protein_coding	8893.83	-0.650623	0.163401	-3.98175	6.84104e-05	0.00256284
Gm10156	processed_pseudogene	293.77	-0.650493	0.224543	-2.89697	0.00376786	0.043036
Clec2i	protein_coding	1103.28	-0.650392	0.215093	-3.02376	0.00249652	0.0329875
Vcp	protein_coding	6327.26	-0.650214	0.150791	-4.31201	1.61777e-05	0.000844294
Trbv12-2	TR_V_gene	953.254	-0.649992	0.154222	-4.21466	2.50154e-05	0.00120335
Camk2d	protein_coding	2135.57	-0.649852	0.0971354	-6.69017	2.22911e-11	6.72624e-09
Gata1	protein_coding	668.263	-0.649344	0.187053	-3.47145	0.00051765	0.0111861
Phf13	protein_coding	395.187	-0.647668	0.182299	-3.55279	0.000381173	0.0092215
Gm10157	processed_pseudogene	718.584	-0.646286	0.219347	-2.94641	0.00321491	0.0389152
Arhgef1	protein_coding	30094.2	-0.646035	0.187071	-3.45343	0.000553505	0.0117518
Rbm3	protein_coding	5205.47	-0.645642	0.203576	-3.17151	0.0015165	0.023355
Eif1	protein_coding	7149.27	-0.644006	0.193377	-3.33031	0.000867484	0.016096
L1cam	protein_coding	618.216	-0.642288	0.179803	-3.57218	0.000354025	0.00878236
Tubb4b-ps2	processed_pseudogene	178.571	-0.642221	0.222717	-2.88358	0.00393181	0.044329
Trav4d-4	TR_V_gene	130.339	-0.642112	0.21839	-2.94021	0.00327995	0.0395022
Cd1d1	protein_coding	1208.08	-0.642095	0.152712	-4.2046	2.6154e-05	0.00125448
Ccnd2	protein_coding	17255.7	-0.641485	0.212137	-3.02392	0.00249525	0.0329875
Pld3	protein_coding	3492.34	-0.640831	0.166732	-3.84349	0.000121298	0.00396273
Zfp758	protein_coding	460.041	-0.639207	0.154478	-4.13785	3.50568e-05	0.0015682
Cyth1	protein_coding	6752.47	-0.638745	0.131598	-4.85376	1.21141e-06	0.000102574
Pitpnm1	protein_coding	4434.39	-0.63874	0.118962	-5.36926	7.90594e-08	9.71904e-06
B4galnt1	protein_coding	8487.78	-0.63618	0.172267	-3.69298	0.000221638	0.00620288
Tpm3-rs7	protein_coding	3496.72	-0.63613	0.216492	-2.93835	0.00329961	0.0396115
Rrp1	protein_coding	4746.88	-0.635927	0.147375	-4.31501	1.59593e-05	0.000835523
Slc7a11	protein_coding	378.786	-0.63561	0.207677	-3.06057	0.00220917	0.0303004
Nr1d2	protein_coding	694.603	-0.635565	0.197792	-3.21331	0.00131216	0.021081
Gbp6	protein_coding	914.893	-0.633261	0.205321	-3.08425	0.00204064	0.0285608
S1pr4	protein_coding	7689.7	-0.629048	0.167066	-3.76526	0.000166374	0.00509437
Gm7964	processed_pseudogene	2046.28	-0.628004	0.216252	-2.90404	0.00368387	0.0424861
Disp1	protein_coding	416.172	-0.627889	0.155598	-4.03532	5.45274e-05	0.00218909
Pisd	protein_coding	567.675	-0.625116	0.128935	-4.84831	1.24515e-06	0.000103842
Oaz2	protein_coding	1519.72	-0.62459	0.168583	-3.70493	0.000211445	0.00600881
Gbp9	protein_coding	3188.87	-0.622607	0.129651	-4.80216	1.5696e-06	0.000126418
Zfp282	protein_coding	321.91	-0.621983	0.175612	-3.5418	0.000397411	0.0094101
Gimap5	protein_coding	4076.6	-0.621946	0.190202	-3.26992	0.00107577	0.0185235
Eif4a-ps4	processed_pseudogene	2906.15	-0.620984	0.204397	-3.03812	0.00238055	0.0318353
Traf1	protein_coding	4444.88	-0.620528	0.117285	-5.29077	1.21804e-07	1.4439e-05
Os9	protein_coding	3076.43	-0.620439	0.142471	-4.35486	1.33152e-05	0.000731719
Dazap2	protein_coding	10253.1	-0.619135	0.169548	-3.65168	0.000260526	0.00691791
Cish	protein_coding	4081.58	-0.618716	0.154591	-4.00229	6.27318e-05	0.00241554
Cndp2	protein_coding	1568.06	-0.617409	0.155871	-3.96102	7.4629e-05	0.00274621
Fam107b	protein_coding	8174.68	-0.616816	0.183037	-3.36991	0.000751938	0.0145785
Emp3	protein_coding	5364.28	-0.616556	0.198504	-3.10602	0.00189625	0.02707
Tmem18	protein_coding	439.497	-0.615524	0.205232	-2.99916	0.00270726	0.0351288
Clic1	protein_coding	9511.89	-0.614664	0.202047	-3.04219	0.00234865	0.0315614
Rnh1	protein_coding	2204.34	-0.614437	0.149597	-4.10727	4.00356e-05	0.00174391
Ets1	protein_coding	15525.5	-0.614092	0.185003	-3.31935	0.000902267	0.0165825
Vcp-rs	processed_pseudogene	2364.34	-0.614053	0.152476	-4.02722	5.64401e-05	0.00224605
Sp100	protein_coding	10006.8	-0.613284	0.144887	-4.23285	2.30747e-05	0.00113298
Trbv15	TR_V_gene	699.756	-0.6128	0.106138	-5.77363	7.75798e-09	1.28751e-06
Dpp4	protein_coding	1717.56	-0.612336	0.175406	-3.49095	0.000481302	0.0107074
Spopl	protein_coding	1616.58	-0.611969	0.179099	-3.41693	0.000633307	0.0129279
Tax1bp1	protein_coding	4701.45	-0.611471	0.132109	-4.62852	3.68288e-06	0.00026009
Ctsd	protein_coding	3852.93	-0.610151	0.165904	-3.67774	0.00023531	0.00642384
Fam129a	protein_coding	1824.73	-0.608825	0.148703	-4.09424	4.23548e-05	0.00182241
Ndrg3	protein_coding	3292.69	-0.607337	0.116034	-5.23412	1.65775e-07	1.88438e-05
Rabac1	protein_coding	4066.96	-0.606738	0.172755	-3.51212	0.000444542	0.0101202
Bnip3l-ps	transcribed_processed_pseudogene	567.409	-0.606576	0.175573	-3.45483	0.000550637	0.0117309
Hnrnpk	protein_coding	21297.7	-0.606449	0.20872	-2.90556	0.00366596	0.0423974
Trbv13-3	TR_V_gene	1116.75	-0.603193	0.170736	-3.53289	0.000411043	0.00959447
P4ha1	protein_coding	1869.31	-0.603152	0.137401	-4.38973	1.13493e-05	0.000645047
Ppp1r18	protein_coding	7427.8	-0.602677	0.171445	-3.51527	0.000439302	0.0100422
Neu3	protein_coding	651.7	-0.6026	0.168313	-3.58023	0.000343287	0.0085672
Slfn1	protein_coding	6566.84	-0.601317	0.191194	-3.14506	0.00166052	0.024962
Eif4a1	protein_coding	8849.27	-0.600888	0.196521	-3.05763	0.00223092	0.0304481
Ccdc125	protein_coding	352.064	-0.599302	0.163515	-3.66512	0.000247223	0.00668227
Tmem50a	protein_coding	5733.79	-0.598463	0.17184	-3.48268	0.000496426	0.010849
Sf3b1	protein_coding	15459.7	-0.595152	0.146024	-4.07571	4.58746e-05	0.0019129
Tmem63a	protein_coding	1303.79	-0.59429	0.150807	-3.94072	8.12363e-05	0.00290807
Rsl1	protein_coding	343.698	-0.59407	0.191007	-3.11021	0.00186956	0.0268169
Eva1b	protein_coding	705.917	-0.593568	0.177567	-3.34278	0.000829441	0.0156597
Gm6335	processed_pseudogene	470.754	-0.591572	0.190341	-3.10796	0.00188384	0.0269751
Rnf187	protein_coding	5900.84	-0.591083	0.17872	-3.30732	0.00094193	0.0168977
Oat	protein_coding	1417.9	-0.59068	0.15709	-3.76013	0.000169824	0.0051619
Tubb4b	protein_coding	2619.48	-0.589935	0.174577	-3.37923	0.0007269	0.0142463
Mical1	protein_coding	2125.55	-0.589349	0.12239	-4.81534	1.46946e-06	0.000119545
Grhpr	protein_coding	396.703	-0.588162	0.160517	-3.66417	0.000248138	0.00669609
Calm2	protein_coding	6123.78	-0.587671	0.196734	-2.98713	0.00281607	0.0359092
Wls	protein_coding	2051.4	-0.587539	0.156923	-3.74412	0.000181025	0.00535208
Slc22a5	protein_coding	654.535	-0.586885	0.193034	-3.04032	0.00236328	0.0316809
Fbxo32	protein_coding	588.688	-0.586015	0.17609	-3.32792	0.000874955	0.0162062
Vwa5a	protein_coding	614.151	-0.585995	0.175682	-3.33554	0.000851335	0.0159467
Serpinb9	protein_coding	564.147	-0.585159	0.204758	-2.8578	0.00426585	0.0469159
Cd6	protein_coding	14964.1	-0.583987	0.158643	-3.68113	0.000232203	0.00639681
Btbd6	protein_coding	602.166	-0.583703	0.184068	-3.17114	0.00151844	0.023355
Xlr4a	protein_coding	802.718	-0.583592	0.190373	-3.06552	0.00217291	0.0299018
Atp2a3	protein_coding	4955.58	-0.583587	0.0966677	-6.03705	1.56961e-09	3.1011e-07
Pfdn5	protein_coding	2663.13	-0.582885	0.205797	-2.83232	0.00462111	0.0493513
Mtmr3	protein_coding	1721.9	-0.582051	0.166108	-3.50406	0.000458228	0.0103466
Tbc1d10c	protein_coding	2897.15	-0.581301	0.197092	-2.94939	0.00318406	0.0386969
Arhgap9	protein_coding	8948.96	-0.58056	0.147176	-3.94466	7.99119e-05	0.00287683
Tubgcp4	protein_coding	787.196	-0.578508	0.171292	-3.37733	0.000731944	0.0143078
Myo18a	protein_coding	1059.88	-0.57819	0.167314	-3.45571	0.000548842	0.0117077
Cdc42ep3	protein_coding	824.423	-0.57819	0.159111	-3.63389	0.000279185	0.00727372
Card6	protein_coding	1501.59	-0.578157	0.143286	-4.03497	5.46085e-05	0.00218909
Nt5e	protein_coding	2204.39	-0.577996	0.18133	-3.18753	0.00143492	0.0224026
Kctd10	protein_coding	1904.05	-0.577518	0.111477	-5.18062	2.21153e-07	2.39886e-05
Rab3ip	protein_coding	1178.43	-0.57702	0.138197	-4.17535	2.97529e-05	0.00140278
Ass1	protein_coding	4095.42	-0.576594	0.139166	-4.14323	3.42453e-05	0.0015486
Ncor1	protein_coding	1545.05	-0.576366	0.120693	-4.77546	1.793e-06	0.000140361
Fmnl3	protein_coding	759.552	-0.575726	0.159247	-3.61531	0.000299993	0.00765951
Gm49396	protein_coding	588.221	-0.574946	0.16422	-3.50108	0.000463377	0.0104203
Flna	protein_coding	6709.23	-0.573898	0.095515	-6.00846	1.87297e-09	3.6144e-07
Sf3b2	protein_coding	6197.55	-0.573784	0.141395	-4.05803	4.94878e-05	0.0020229
Ndufa5	protein_coding	696.985	-0.573269	0.192573	-2.97689	0.00291187	0.0364353
Ifi47	protein_coding	8256.13	-0.573078	0.167478	-3.42182	0.000622037	0.0127606
Gm5424	processed_pseudogene	660.425	-0.57277	0.153412	-3.73353	0.000188811	0.00553016
Ccng1	protein_coding	4005.69	-0.572724	0.136463	-4.19691	2.7058e-05	0.00129411
Mat2b	protein_coding	4478.78	-0.572213	0.160833	-3.55781	0.000373955	0.00910275
Arl6ip1	protein_coding	10450	-0.569114	0.190512	-2.98728	0.00281472	0.0359092
Kdm4c	protein_coding	829.394	-0.569111	0.190825	-2.98237	0.00286026	0.0361509
Lta	protein_coding	1965.81	-0.568322	0.128305	-4.42947	9.44628e-06	0.000561901
Pja2	protein_coding	838.203	-0.567461	0.188816	-3.00537	0.00265259	0.0345783
Rassf5	protein_coding	10435.4	-0.566897	0.162596	-3.48654	0.000489319	0.0108003
Sipa1	protein_coding	5075.32	-0.565186	0.132005	-4.28154	1.85606e-05	0.00093831
Pnrc1	protein_coding	6017.37	-0.564153	0.141256	-3.99385	6.50097e-05	0.00246324
Trbj1-2	TR_J_gene	241.601	-0.564004	0.182099	-3.09723	0.00195335	0.0276499
Slc35b4	protein_coding	660.756	-0.563699	0.174429	-3.23168	0.00123063	0.0202213
Socs2	protein_coding	1398.89	-0.561626	0.114813	-4.89164	9.99989e-07	8.73464e-05
Il17ra	protein_coding	4277.44	-0.561404	0.123912	-4.53066	5.88009e-06	0.000379712
Gm15542	processed_pseudogene	716.394	-0.560908	0.190359	-2.94658	0.00321313	0.0389152
2310011J03Rik	protein_coding	1652.91	-0.560176	0.185346	-3.02232	0.00250842	0.0330657
Lcp1	protein_coding	24557.3	-0.559862	0.19107	-2.93015	0.003388	0.0403352
Gmppb	protein_coding	443.005	-0.559648	0.151804	-3.68666	0.000227218	0.00631285
Tacc1	protein_coding	1651.15	-0.558174	0.197059	-2.83253	0.00461815	0.0493513
Snx20	protein_coding	2424.77	-0.556325	0.162647	-3.42045	0.000625181	0.0127935
Psme2b	protein_coding	1068.18	-0.555529	0.19064	-2.91402	0.00356803	0.0416714
Etfbkmt	protein_coding	1095.29	-0.553926	0.182886	-3.0288	0.00245524	0.032571
Ube2l6	protein_coding	606.436	-0.553911	0.177605	-3.11878	0.00181599	0.0263445
Wdr6	protein_coding	2281.55	-0.553731	0.148811	-3.72103	0.000198409	0.00569464
Cd5	protein_coding	15973.4	-0.553524	0.172449	-3.20977	0.00132839	0.0211966
Arid5a	protein_coding	2468.13	-0.551567	0.131595	-4.1914	2.77236e-05	0.00131458
Trp53i11	protein_coding	3808.63	-0.551304	0.092403	-5.9663	2.42693e-09	4.52555e-07
Sh2d2a	protein_coding	7711.34	-0.550898	0.18248	-3.01896	0.00253646	0.0333366
Zfp677	protein_coding	495.578	-0.550881	0.181565	-3.03406	0.00241285	0.0321636
Tuba4a	protein_coding	3964.89	-0.549609	0.173881	-3.16083	0.00157318	0.0239528
Il6ra	protein_coding	4730.65	-0.54907	0.0982868	-5.58641	2.31817e-08	3.28824e-06
Sdf4	protein_coding	9307.71	-0.548515	0.163686	-3.35102	0.000805131	0.0153235
Wdr1	protein_coding	13402	-0.548106	0.168635	-3.25024	0.00115306	0.0194293
Dis3l	protein_coding	484.474	-0.547266	0.149995	-3.64855	0.000263724	0.00696013
Lcp2	protein_coding	8991.26	-0.546648	0.15788	-3.46243	0.000535329	0.0115231
Tubb4b-ps1	processed_pseudogene	772.791	-0.546458	0.187831	-2.9093	0.00362239	0.0420808
Dnajc9	protein_coding	1895.03	-0.544246	0.118268	-4.6018	4.1886e-06	0.000290853
Golph3l	protein_coding	997.618	-0.543394	0.170411	-3.18873	0.00142897	0.0223539
Gm12216	protein_coding	370.795	-0.543351	0.18894	-2.87579	0.00403019	0.0451926
Rdx	protein_coding	1769.87	-0.542779	0.155129	-3.4989	0.00046719	0.0104721
Rptor	protein_coding	499.482	-0.541878	0.160752	-3.3709	0.000749227	0.0145429
Zfp329	protein_coding	378.421	-0.539895	0.1682	-3.20984	0.00132809	0.0211966
Stx7	protein_coding	785.19	-0.538896	0.139699	-3.85755	0.000114529	0.00379386
Cipc	protein_coding	581.767	-0.538235	0.160282	-3.35806	0.000784914	0.015122
Tmem154	protein_coding	2852.09	-0.53767	0.150673	-3.56844	0.000359107	0.00887239
Syf2	protein_coding	3322.14	-0.5374	0.165851	-3.24026	0.00119421	0.0198389
Iigp1	protein_coding	1359.65	-0.537359	0.158322	-3.39409	0.00068857	0.0137515
Stat5b	protein_coding	3492.8	-0.537062	0.105448	-5.09314	3.52185e-07	3.5858e-05
2001-09-01	protein_coding	8423.38	-0.536499	0.189114	-2.8369	0.00455535	0.0490594
Ezh1	protein_coding	1659.58	-0.53572	0.1653	-3.2409	0.00119153	0.0198143
Lta4h	protein_coding	4606.52	-0.532875	0.150631	-3.53762	0.000403749	0.00949096
Exoc2	protein_coding	1803.56	-0.532328	0.121023	-4.39857	1.08966e-05	0.000625741
Lrp10	protein_coding	7469.55	-0.532035	0.105533	-5.04139	4.62165e-07	4.50233e-05
Sqstm1	protein_coding	7682.8	-0.529183	0.143834	-3.67913	0.000234035	0.00641992
Traf3ip3	protein_coding	7200.82	-0.528222	0.159704	-3.30751	0.000941304	0.0168977
Ptprc	protein_coding	31748.5	-0.527761	0.162225	-3.25327	0.00114084	0.0193
Relb	protein_coding	1647.95	-0.526549	0.103805	-5.07247	3.92689e-07	3.96526e-05
Mfap1a	protein_coding	1754.24	-0.526433	0.131788	-3.99455	6.48159e-05	0.00246294
Sh3bp5	protein_coding	1616.77	-0.526428	0.132506	-3.97287	7.10123e-05	0.00263932
Iws1	protein_coding	900.578	-0.525509	0.133457	-3.93767	8.22778e-05	0.00293652
Irgm1	protein_coding	3093.41	-0.52517	0.160937	-3.2632	0.00110163	0.0188676
Serpinb6a	protein_coding	678.84	-0.522996	0.111184	-4.70386	2.55285e-06	0.000193237
Ppp1ca	protein_coding	10543.5	-0.522758	0.181911	-2.87371	0.00405687	0.0453692
Tnfrsf13b	protein_coding	1534.38	-0.522162	0.11045	-4.72758	2.27209e-06	0.000174572
Nod1	protein_coding	1291.27	-0.522068	0.156313	-3.33989	0.000838118	0.0157346
Ifi35	protein_coding	1887.39	-0.520896	0.153096	-3.40241	0.000667937	0.0134543
Sorl1	protein_coding	544.967	-0.52074	0.172887	-3.01203	0.00259505	0.0339382
Cd82	protein_coding	8373.06	-0.520704	0.153366	-3.39517	0.000685856	0.0137387
Zfp110	protein_coding	1408.88	-0.520626	0.126478	-4.11633	3.84959e-05	0.00169464
Plekhb2	protein_coding	2197.34	-0.519821	0.136933	-3.79618	0.000146945	0.00463632
Cd9	protein_coding	1338.45	-0.519029	0.104463	-4.96855	6.74565e-07	6.15114e-05
Ube2d3	protein_coding	9472.78	-0.51862	0.176506	-2.93825	0.00330069	0.0396115
Eif4g2	protein_coding	14717.6	-0.518499	0.162363	-3.19345	0.00140583	0.0220817
Triobp	protein_coding	1174.38	-0.518421	0.127104	-4.07872	4.52836e-05	0.00189779
Bnip3l	protein_coding	3296.53	-0.517935	0.148276	-3.49305	0.000477544	0.0106432
Def6	protein_coding	3477.46	-0.517209	0.139009	-3.7207	0.000198674	0.00569464
Ikzf4	protein_coding	3221.91	-0.516949	0.100194	-5.15947	2.47646e-07	2.61779e-05
Gm10093	processed_pseudogene	952.112	-0.515353	0.118506	-4.34875	1.36917e-05	0.00074746
Irgm2	protein_coding	1734.18	-0.515117	0.126158	-4.0831	4.44393e-05	0.00187663
Xbp1	protein_coding	2632.15	-0.51219	0.129526	-3.95434	7.67461e-05	0.00280066
Tspo	protein_coding	3889.59	-0.509016	0.178349	-2.85404	0.00431673	0.0472537
Gnai3	protein_coding	4676.48	-0.507058	0.136299	-3.72019	0.000199069	0.00569613
Slamf1	protein_coding	1961.12	-0.506952	0.117754	-4.30517	1.66861e-05	0.000865382
Akna	protein_coding	9228	-0.505674	0.113472	-4.45637	8.33589e-06	0.000515179
Pbxip1	protein_coding	3125.46	-0.505223	0.151237	-3.34061	0.000835953	0.0157296
Ptges3	protein_coding	2445.06	-0.505191	0.143788	-3.51345	0.000442325	0.0100836
Slc26a2	protein_coding	801.589	-0.504834	0.171822	-2.93812	0.00330208	0.0396115
Ablim1	protein_coding	12420.8	-0.503821	0.155405	-3.24198	0.00118703	0.019779
Btg1	protein_coding	10842.9	-0.502531	0.164296	-3.05868	0.00222312	0.0304162
Tnfaip8l2	protein_coding	2842.64	-0.50099	0.153932	-3.25461	0.00113547	0.0192289
Akr1b3	protein_coding	2167.09	-0.499997	0.148712	-3.36218	0.000773298	0.0149576
Commd4	protein_coding	1815.13	-0.499983	0.173044	-2.88935	0.00386041	0.043732
Tpm4	protein_coding	5100.07	-0.499786	0.132002	-3.78619	0.000152973	0.00476312
Zfand6	protein_coding	3346.71	-0.49797	0.15865	-3.1388	0.00169643	0.0252728
Fam118a	protein_coding	877.36	-0.49765	0.172005	-2.89323	0.00381306	0.0432843
Sat1	protein_coding	4222.81	-0.496765	0.144743	-3.43205	0.000599027	0.012458
Cirbp	protein_coding	2548.02	-0.495484	0.167445	-2.95908	0.00308555	0.0378197
Hip1r	protein_coding	1033.02	-0.495151	0.138471	-3.57584	0.000349111	0.00869948
Psen1	protein_coding	2165.8	-0.495091	0.148607	-3.33155	0.000863647	0.0160685
Rac1	protein_coding	9058.44	-0.49427	0.161691	-3.05687	0.00223659	0.0304588
Akr1a1	protein_coding	5376.3	-0.493365	0.162251	-3.04076	0.00235979	0.0316809
Ezr	protein_coding	8470.46	-0.492817	0.151731	-3.24796	0.00116237	0.0194488
Bsdc1	protein_coding	650.942	-0.491147	0.154121	-3.18676	0.00143875	0.0224038
Zbp1	protein_coding	1779.08	-0.491122	0.166195	-2.95509	0.00312575	0.0381714
Slc44a2	protein_coding	11306.5	-0.490402	0.162949	-3.00954	0.00261644	0.0341909
Rnf114	protein_coding	5571.12	-0.490394	0.132739	-3.69442	0.000220388	0.00618877
Acss1	protein_coding	1047.04	-0.489567	0.155872	-3.14083	0.0016847	0.0251886
Cdc42se1	protein_coding	6675.1	-0.489518	0.149511	-3.27412	0.00105991	0.0182851
Bcap31	protein_coding	3536.31	-0.489137	0.147647	-3.31289	0.000923377	0.0167663
Map1lc3b	protein_coding	3824.7	-0.489104	0.12709	-3.84848	0.000118851	0.00390152
Ttc7	protein_coding	1182.36	-0.48819	0.169996	-2.87177	0.00408175	0.0456167
2007-09-01	protein_coding	8151.22	-0.487395	0.168872	-2.88619	0.0038994	0.0440834
Rela	protein_coding	3773.02	-0.487153	0.102766	-4.7404	2.13297e-06	0.000164645
Bid	protein_coding	890.226	-0.485506	0.136087	-3.56761	0.000360252	0.00888373
Prkch	protein_coding	6570.94	-0.485104	0.148995	-3.25585	0.00113054	0.0191845
Eps15	protein_coding	1853.11	-0.484743	0.166981	-2.90298	0.00369632	0.0425115
Reep5	protein_coding	2680.16	-0.484725	0.124461	-3.89461	9.8356e-05	0.00331771
Rgs14	protein_coding	2545.78	-0.484419	0.105586	-4.58793	4.47662e-06	0.000305
Sun2	protein_coding	3932.71	-0.484266	0.141231	-3.4289	0.000606032	0.0125553
Dhx40	protein_coding	910.326	-0.48383	0.169536	-2.85385	0.00431934	0.0472537
Aldh4a1	protein_coding	361.795	-0.483634	0.159919	-3.02424	0.00249261	0.0329875
Tnfrsf1b	protein_coding	5898.51	-0.483582	0.115472	-4.18787	2.81587e-05	0.0013314
Cant1	protein_coding	2342.69	-0.48299	0.123652	-3.90603	9.38241e-05	0.00323051
Hk1	protein_coding	2953.71	-0.482266	0.151337	-3.1867	0.00143905	0.0224038
Vapa	protein_coding	3041.19	-0.481817	0.154612	-3.11629	0.00183142	0.0264528
Cd164	protein_coding	6319.24	-0.480186	0.164985	-2.91049	0.00360864	0.0420264
Hsdl2	protein_coding	768.539	-0.479187	0.114215	-4.19547	2.72301e-05	0.00129859
Eef1akmt1	protein_coding	837.207	-0.478767	0.16465	-2.90779	0.00363997	0.0422184
Cep250	protein_coding	898.893	-0.477966	0.144942	-3.29764	0.00097502	0.0172694
Zdhhc20	protein_coding	3565.96	-0.477525	0.0987423	-4.83608	1.32427e-06	0.0001088
Sdha	protein_coding	6702.72	-0.477521	0.15257	-3.12985	0.00174893	0.0257281
Aaed1	protein_coding	527.812	-0.477357	0.141503	-3.37348	0.000742253	0.0144431
Cers4	protein_coding	990.422	-0.477354	0.148929	-3.20524	0.00134948	0.0214521
Ubac2	protein_coding	2813.13	-0.477274	0.124664	-3.82848	0.000128937	0.00414696
Irf9	protein_coding	4809.25	-0.477254	0.104086	-4.58518	4.53594e-06	0.000307259
Ncbp3	protein_coding	903.876	-0.476228	0.162558	-2.92958	0.00339415	0.0403794
Mob3a	protein_coding	1875.15	-0.475457	0.167527	-2.83809	0.00453843	0.0489407
Stk10	protein_coding	6862.09	-0.475166	0.12909	-3.68089	0.000232422	0.00639681
Timm29	protein_coding	894.972	-0.474942	0.120698	-3.93496	8.32094e-05	0.0029634
Ramp1	protein_coding	981.292	-0.474735	0.147258	-3.22384	0.00126484	0.0204993
Tap2	protein_coding	4768.79	-0.47468	0.131122	-3.62013	0.000294458	0.00755305
Prkca	protein_coding	2030.53	-0.472858	0.137527	-3.43829	0.000585396	0.0122822
Nek7	protein_coding	2189.87	-0.472812	0.146973	-3.217	0.0012954	0.0208521
2610021A01Rik	protein_coding	443.453	-0.471689	0.161315	-2.92402	0.00345544	0.040729
Pcmtd2	protein_coding	1410.22	-0.470286	0.149893	-3.13747	0.00170411	0.0253166
Ap3m1	protein_coding	1003.91	-0.469677	0.119602	-3.92699	8.60162e-05	0.00303084
Rmnd5b	protein_coding	1337.43	-0.469306	0.121587	-3.85983	0.000113468	0.00377215
Zfp148	protein_coding	1463.87	-0.468864	0.148643	-3.1543	0.00160885	0.0243986
Mfap1b	protein_coding	2165.14	-0.468472	0.10236	-4.57671	4.72344e-06	0.00031737
Cybc1	protein_coding	2604.92	-0.467829	0.126468	-3.69917	0.000216302	0.00611392
H2-T22	protein_coding	4312.69	-0.4664	0.164033	-2.84333	0.00446443	0.0485211
Parvg	protein_coding	2962.6	-0.4662	0.100458	-4.64073	3.47187e-06	0.000248359
Cd3e	protein_coding	8224.32	-0.465812	0.160437	-2.90339	0.00369145	0.0425115
Cpne3	protein_coding	631.333	-0.465678	0.146302	-3.183	0.00145757	0.0226709
Maf1	protein_coding	5340.94	-0.465674	0.143456	-3.24611	0.00116994	0.0195139
Coro1b	protein_coding	6224.58	-0.465031	0.12416	-3.74541	0.0001801	0.00535208
Leprot	protein_coding	1170.14	-0.463983	0.126145	-3.67817	0.000234912	0.00642384
Micu2	protein_coding	1599.5	-0.463654	0.146415	-3.16671	0.00154173	0.0235821
Parp10	protein_coding	2017.34	-0.460033	0.121949	-3.77236	0.000161713	0.00499775
Ttc3	protein_coding	1050.34	-0.459814	0.142611	-3.22424	0.00126306	0.0204978
Sfxn3	protein_coding	2309.27	-0.457535	0.151353	-3.02296	0.00250311	0.033022
Rpa1	protein_coding	3553.05	-0.457518	0.129155	-3.54239	0.000396519	0.0094101
Gm4070	protein_coding	1474.39	-0.45751	0.134512	-3.40125	0.000670778	0.0134779
Gipc1	protein_coding	819.859	-0.457174	0.154178	-2.96523	0.00302461	0.0373663
Acap2	protein_coding	866.002	-0.457086	0.137857	-3.31565	0.000914306	0.0166923
Itpk1	protein_coding	1023.61	-0.456839	0.121369	-3.76403	0.000167195	0.00510067
Ptpre	protein_coding	700.124	-0.454826	0.134617	-3.37866	0.000728407	0.0142555
Slc28a2	protein_coding	2698.22	-0.454797	0.110538	-4.1144	3.88188e-05	0.00170433
Rabgap1l	protein_coding	2357.77	-0.452944	0.125163	-3.61883	0.000295932	0.00757916
Phf1	protein_coding	2110.64	-0.452457	0.127551	-3.54726	0.000389262	0.00932205
Hdac1	protein_coding	3903.47	-0.451761	0.109175	-4.13795	3.50429e-05	0.0015682
2006-09-01	protein_coding	4745.8	-0.448944	0.135557	-3.31184	0.00092684	0.0167778
Spata13	protein_coding	3302.81	-0.447528	0.111545	-4.01207	6.01882e-05	0.00233931
Jak1	protein_coding	14024.2	-0.446402	0.150451	-2.96709	0.00300633	0.0372336
Trbv19	TR_V_gene	1032.28	-0.4461	0.125016	-3.56833	0.000359258	0.00887239
Il21r	protein_coding	5452.3	-0.446054	0.140613	-3.1722	0.00151287	0.0233342
Slc2a1	protein_coding	1029.6	-0.445324	0.142959	-3.11505	0.00183915	0.0265319
Tmem59	protein_coding	4374.26	-0.445075	0.152126	-2.92569	0.0034369	0.0405681
Hadha	protein_coding	2543.1	-0.44354	0.156708	-2.83036	0.00464962	0.0494649
Puf60	protein_coding	5185.31	-0.442719	0.145301	-3.04691	0.00231208	0.0311709
Sigirr	protein_coding	3258.57	-0.44268	0.120113	-3.68553	0.00022823	0.00631285
Arl5c	protein_coding	1864.38	-0.442539	0.133517	-3.31447	0.000918176	0.0167267
Sit1	protein_coding	2307.29	-0.44216	0.151041	-2.92741	0.003418	0.0404225
Syngr2	protein_coding	2009.16	-0.441873	0.137102	-3.22296	0.00126873	0.0205223
Ncln	protein_coding	2644.03	-0.440775	0.117187	-3.76131	0.000169028	0.00514714
Hbp1	protein_coding	3051.28	-0.438459	0.11319	-3.87366	0.000107214	0.00358077
Gba	protein_coding	1484.28	-0.436614	0.136279	-3.20382	0.00135616	0.0215204
Hexb	protein_coding	1263.36	-0.433171	0.132	-3.2816	0.00103219	0.0179186
Casp8	protein_coding	4706.49	-0.432399	0.100707	-4.29363	1.75773e-05	0.000903136
Rpn2	protein_coding	4255.92	-0.431662	0.130847	-3.29897	0.000970402	0.0172365
Scamp2	protein_coding	1924.88	-0.43085	0.125706	-3.42744	0.000609296	0.0125926
Mgrn1	protein_coding	1296.79	-0.430422	0.114889	-3.74641	0.000179381	0.00534473
Ccm2	protein_coding	4368.93	-0.429769	0.112872	-3.80758	0.000140336	0.0044663
Tbc1d14	protein_coding	1749.87	-0.429326	0.137223	-3.12867	0.001756	0.0257899
Rhof	protein_coding	5208.57	-0.429248	0.109173	-3.93182	8.43054e-05	0.002996
Arl6ip5	protein_coding	2985.18	-0.426907	0.141447	-3.01815	0.00254326	0.0333924
Tnfrsf25	protein_coding	3473.92	-0.426408	0.132769	-3.21165	0.00131974	0.021121
Anp32e	protein_coding	1965.26	-0.426178	0.143675	-2.96627	0.0030144	0.0373057
Crbn	protein_coding	1622.66	-0.425939	0.146484	-2.90776	0.00364031	0.0422184
Derl1	protein_coding	2706.21	-0.422572	0.0988397	-4.27533	1.90856e-05	0.00095983
Zfp869	protein_coding	941.534	-0.422533	0.11117	-3.80079	0.000144235	0.00455949
Dtx1	protein_coding	4250.24	-0.422388	0.126265	-3.34524	0.00082212	0.0155575
Vps35	protein_coding	2544.22	-0.422369	0.137692	-3.06749	0.00215864	0.0297458
Ciz1	protein_coding	1472.1	-0.421899	0.115831	-3.64238	0.000270131	0.00709351
Bin1	protein_coding	2487.29	-0.421214	0.134833	-3.12397	0.00178431	0.0260673
Ilvbl	protein_coding	1503.26	-0.421176	0.138581	-3.03922	0.00237194	0.0317457
Plekhg2	protein_coding	2650	-0.417441	0.128514	-3.24821	0.00116132	0.0194488
Nfyc	protein_coding	1176.66	-0.417157	0.114019	-3.65866	0.000253538	0.00680935
Ccndbp1	protein_coding	1827.55	-0.416724	0.141839	-2.938	0.00330335	0.0396115
Actr10	protein_coding	1979.1	-0.416452	0.114169	-3.64767	0.000264633	0.00696013
Xlr4b	protein_coding	1614.76	-0.415646	0.139073	-2.9887	0.00280165	0.0359092
Tfip11	protein_coding	685.381	-0.415567	0.142184	-2.92274	0.00346963	0.0408398
Lipa	protein_coding	2541.08	-0.415067	0.11905	-3.4865	0.000489392	0.0108003
Ano6	protein_coding	1234.62	-0.412807	0.142619	-2.89448	0.00379793	0.0432011
Dhx8	protein_coding	1290.32	-0.412348	0.142035	-2.90314	0.00369436	0.0425115
Fam53b	protein_coding	3627.26	-0.411587	0.118496	-3.47342	0.000513877	0.011119
Sufu	protein_coding	864.783	-0.411156	0.142044	-2.89457	0.00379683	0.0432011
Lamp1	protein_coding	4960.11	-0.411064	0.137841	-2.98215	0.00286228	0.0361509
Il10rb	protein_coding	1468.14	-0.410947	0.0985248	-4.17101	3.03258e-05	0.00142171
Vps11	protein_coding	1382.82	-0.409576	0.129404	-3.16511	0.00155025	0.0236688
Acot9	protein_coding	1500.56	-0.408452	0.122201	-3.34247	0.000830354	0.0156597
Iqgap1	protein_coding	3599.23	-0.407335	0.0965332	-4.21963	2.44702e-05	0.00118399
Wwp2	protein_coding	2237.56	-0.406907	0.0889846	-4.57278	4.81286e-06	0.000322073
Lrrc61	protein_coding	757.666	-0.406459	0.138628	-2.93201	0.00336779	0.040181
Mbp	protein_coding	2404.53	-0.406406	0.133065	-3.05418	0.00225674	0.0305987
Frmd8	protein_coding	6710.63	-0.406274	0.137721	-2.94998	0.0031779	0.038666
Nmi	protein_coding	1717.18	-0.406168	0.108146	-3.75575	0.000172821	0.00522092
Gsto1	protein_coding	799.256	-0.40466	0.142172	-2.84627	0.00442347	0.048139
Tex261	protein_coding	2311.37	-0.403204	0.124164	-3.24735	0.00116486	0.0194488
Arhgap27	protein_coding	2674.02	-0.402996	0.0924118	-4.36087	1.29549e-05	0.00071906
Clcf1	protein_coding	1016.57	-0.402763	0.109255	-3.68644	0.000227413	0.00631285
Efr3a	protein_coding	3754.4	-0.402048	0.132281	-3.03934	0.00237095	0.0317457
Gata3	protein_coding	4303.84	-0.401369	0.127738	-3.14214	0.00167719	0.0251216
Arid4b	protein_coding	1824.59	-0.400603	0.12546	-3.19306	0.00140771	0.0220817
Ctps2	protein_coding	2487.41	-0.400559	0.127642	-3.13814	0.00170022	0.0252839
Man2b2	protein_coding	1410.15	-0.40038	0.123232	-3.24898	0.00115818	0.0194488
Bcl2l1	protein_coding	1642.84	-0.39952	0.137646	-2.90252	0.00370172	0.0425362
Casp6	protein_coding	714.398	-0.399375	0.111349	-3.58669	0.0003349	0.0083831
Kcnab2	protein_coding	2948.99	-0.398732	0.113569	-3.51093	0.000446538	0.010128
Vps28	protein_coding	4539.06	-0.398694	0.139856	-2.85074	0.00436181	0.0476241
Abtb1	protein_coding	1560.3	-0.396202	0.107422	-3.68827	0.000225785	0.00629769
Trex1	protein_coding	1449.11	-0.396104	0.0953705	-4.15332	3.27679e-05	0.0015095
Fam111a	protein_coding	1006.69	-0.395116	0.11571	-3.41469	0.000638539	0.012992
Inpp5f	protein_coding	1391.51	-0.394203	0.132948	-2.96508	0.00302605	0.0373663
Mtmr6	protein_coding	1483.63	-0.393407	0.128867	-3.05283	0.00226697	0.0307124
Cbx7	protein_coding	5212.37	-0.391936	0.109432	-3.58156	0.000341549	0.00853667
Ip6k1	protein_coding	1772.56	-0.391509	0.12282	-3.18766	0.00143431	0.0224026
Akap8	protein_coding	4462.46	-0.390744	0.116016	-3.36801	0.00075712	0.0146618
Tagap	protein_coding	2062.66	-0.39049	0.116431	-3.35382	0.000797037	0.0152217
Pou2f2	protein_coding	1535.12	-0.390047	0.118976	-3.27837	0.0010441	0.0180686
Supt20	protein_coding	3392.85	-0.389486	0.0915278	-4.25538	2.08693e-05	0.00103697
Ubl7	protein_coding	1787.52	-0.389391	0.108541	-3.58748	0.000333883	0.00837028
Prkd2	protein_coding	4354.74	-0.389045	0.0879632	-4.42281	9.74244e-06	0.000573007
Rbmx	protein_coding	969.106	-0.387616	0.104146	-3.72186	0.000197761	0.00568812
Lasp1	protein_coding	5800.93	-0.385983	0.106282	-3.6317	0.000281558	0.00732405
Fam3c	protein_coding	2193.43	-0.385514	0.109282	-3.52769	0.000419208	0.00971672
Ap1g2	protein_coding	2416.13	-0.38487	0.134984	-2.85123	0.004355	0.0475995
Igf2r	protein_coding	2628.51	-0.383819	0.11743	-3.2685	0.0010812	0.018556
Uba1	protein_coding	6091.6	-0.38289	0.120901	-3.16696	0.0015404	0.0235821
Uba7	protein_coding	4450.22	-0.382499	0.128593	-2.97449	0.00293477	0.0366207
Psmc3	protein_coding	3503.89	-0.379451	0.127048	-2.98667	0.00282036	0.0359092
Fam189b	protein_coding	4481.37	-0.379025	0.130607	-2.90204	0.00370744	0.042551
Tapbpl	protein_coding	2008.86	-0.37507	0.121633	-3.08362	0.00204501	0.0285922
Rftn1	protein_coding	1964.41	-0.374622	0.11951	-3.13466	0.00172055	0.025474
Pdlim2	protein_coding	1921.67	-0.374062	0.119471	-3.13098	0.00174225	0.0256789
Ssh2	protein_coding	2967.03	-0.373581	0.113567	-3.28952	0.00100357	0.0175504
Snx2	protein_coding	2654.13	-0.372633	0.110241	-3.38016	0.000724442	0.0142451
Wsb1	protein_coding	1951.51	-0.370085	0.121357	-3.04956	0.00229175	0.030947
Selenok	protein_coding	2005.54	-0.369982	0.112452	-3.29012	0.00100145	0.0175441
Stat3	protein_coding	5153.84	-0.369464	0.121086	-3.05126	0.00227886	0.0308314
Rnf31	protein_coding	1443.24	-0.367457	0.126894	-2.89577	0.00378228	0.0431414
Skap1	protein_coding	7781.86	-0.367424	0.123596	-2.97279	0.00295105	0.0367409
Fam32a	protein_coding	3651.17	-0.3672	0.114319	-3.21207	0.00131782	0.0211119
Fmnl1	protein_coding	6230.83	-0.366345	0.118091	-3.10222	0.00192073	0.0273149
Cnot2	protein_coding	2387.48	-0.365814	0.102617	-3.56484	0.000364082	0.00889884
Tgoln1	protein_coding	2453.8	-0.364895	0.121677	-2.99889	0.00270968	0.0351327
2002-03-01	protein_coding	1666.12	-0.36468	0.122847	-2.96856	0.00299196	0.037111
Inpp1	protein_coding	1280.04	-0.364175	0.119365	-3.05093	0.00228133	0.0308314
Ptpn6	protein_coding	5027.24	-0.364054	0.110512	-3.29427	0.000986794	0.0173992
Slfn10-ps	transcribed_unprocessed_pseudogene	981.139	-0.364044	0.115895	-3.14116	0.00168278	0.0251826
Vav1	protein_coding	4182.74	-0.362145	0.0964198	-3.75592	0.000172708	0.00522092
Tecpr1	protein_coding	4799.21	-0.359156	0.125461	-2.86269	0.00420056	0.0464131
Pdha1	protein_coding	2610.92	-0.357861	0.119113	-3.00438	0.00266119	0.0346121
Cdipt	protein_coding	5247.87	-0.357595	0.109956	-3.25216	0.00114533	0.0193563
Abcf3	protein_coding	1428.45	-0.355123	0.107029	-3.318	0.000906659	0.0166081
Tnip1	protein_coding	4489.6	-0.354729	0.0944569	-3.75546	0.000173025	0.00522092
Dapp1	protein_coding	2118.3	-0.354245	0.118755	-2.983	0.00285433	0.0361509
Sec24c	protein_coding	4750.96	-0.353765	0.119335	-2.96447	0.00303203	0.0374123
Atp6v1d	protein_coding	2288.51	-0.353738	0.116497	-3.03646	0.0023937	0.0319854
Glud1	protein_coding	3295.07	-0.353721	0.121668	-2.90727	0.00364602	0.0422541
Taz	protein_coding	2133.71	-0.353013	0.120841	-2.92129	0.00348582	0.0409417
Arhgef2	protein_coding	2262.55	-0.352468	0.109733	-3.21205	0.0013179	0.0211119
Tars2	protein_coding	1249.71	-0.35246	0.124502	-2.83096	0.00464088	0.0494352
Trim27	protein_coding	2429.33	-0.352435	0.121797	-2.89363	0.00380822	0.0432589
Irf3	protein_coding	3178.33	-0.35136	0.113338	-3.1001	0.00193458	0.0274647
Hsd17b4	protein_coding	1253.99	-0.350347	0.117512	-2.98136	0.00286967	0.0362167
Dcaf11	protein_coding	2659.02	-0.349719	0.110009	-3.179	0.00147783	0.0228575
Psmd3	protein_coding	2060.13	-0.345348	0.116311	-2.96917	0.0029861	0.037066
Sars	protein_coding	2689.24	-0.344812	0.108784	-3.16969	0.00152604	0.0234501
Sin3b	protein_coding	2394.36	-0.342248	0.116717	-2.93229	0.00336475	0.0401737
Ambra1	protein_coding	947.073	-0.341135	0.116999	-2.9157	0.00354893	0.0415067
Nrbp1	protein_coding	3182.81	-0.338216	0.106067	-3.18871	0.00142911	0.0223539
Ss18	protein_coding	2188.53	-0.338105	0.0853879	-3.95963	7.50652e-05	0.00275615
Supt5	protein_coding	4230.22	-0.33721	0.0981057	-3.43721	0.000587731	0.0123156
Uba2	protein_coding	2727.34	-0.334687	0.113194	-2.95675	0.00310903	0.0379993
9930111J21Rik1	protein_coding	1560	-0.333879	0.110696	-3.01618	0.00255979	0.0335828
Ptpn7	protein_coding	6284.67	-0.33118	0.0887799	-3.73035	0.000191216	0.00558336
Atf7ip	protein_coding	6503.65	-0.329877	0.11674	-2.82575	0.00471708	0.0499583
Mpp1	protein_coding	1636.58	-0.329513	0.112772	-2.92193	0.00347868	0.0408868
Adcy7	protein_coding	2689.45	-0.327845	0.10609	-3.09025	0.00199987	0.0281747
Rab5b	protein_coding	1618.13	-0.3269	0.113869	-2.87084	0.0040938	0.0457206
Prkag2	protein_coding	894.533	-0.326189	0.115217	-2.83108	0.00463912	0.0494352
Cers2	protein_coding	4037.8	-0.324824	0.112013	-2.89987	0.00373318	0.0427282
Hp1bp3	protein_coding	4103.1	-0.32448	0.10848	-2.99116	0.00277919	0.0357824
Rin3	protein_coding	2996.86	-0.324292	0.0807616	-4.01542	5.93395e-05	0.00232264
Lonp2	protein_coding	2323.49	-0.318731	0.109053	-2.92273	0.00346976	0.0408398
Rasgrp1	protein_coding	6268.01	-0.317174	0.111718	-2.83905	0.00452477	0.0489058
Cog5	protein_coding	770.362	-0.317075	0.111266	-2.8497	0.00437599	0.0477161
Phc3	protein_coding	2807.77	-0.31664	0.108744	-2.91179	0.00359367	0.0418824
Skiv2l	protein_coding	3017.41	-0.316494	0.0782639	-4.04394	5.25615e-05	0.00212759
Mapre1	protein_coding	4238.95	-0.316144	0.102322	-3.08969	0.00200363	0.0282037
Smu1	protein_coding	2872.04	-0.313994	0.100677	-3.11884	0.00181567	0.0263445
Arhgef3	protein_coding	6674.15	-0.313532	0.102823	-3.04924	0.00229422	0.0309552
Camta2	protein_coding	898.233	-0.311199	0.108641	-2.86447	0.00417711	0.0462464
Actr1a	protein_coding	2529.34	-0.307864	0.103024	-2.98827	0.00280557	0.0359092
Nbr1	protein_coding	1772.65	-0.305359	0.0971215	-3.1441	0.001666	0.024999
Anapc2	protein_coding	2396.02	-0.305237	0.0764607	-3.99207	6.54979e-05	0.00247046
Copa	protein_coding	5199	-0.303747	0.101313	-2.99811	0.00271659	0.0351705
Gsdmd	protein_coding	2051.72	-0.303623	0.098538	-3.08128	0.00206113	0.028745
Akap8l	protein_coding	3015.52	-0.303334	0.0991921	-3.05805	0.00222785	0.0304481
Eftud2	protein_coding	2037.35	-0.303206	0.105733	-2.86764	0.00413542	0.0460923
Smc1a	protein_coding	2067.68	-0.300699	0.105717	-2.84437	0.00444988	0.0483947
Gltp	protein_coding	4958.38	-0.2995	0.104492	-2.86626	0.00415356	0.0462464
St6gal1	protein_coding	4145.21	-0.298431	0.0918255	-3.24998	0.00115413	0.0194293
Abhd8	protein_coding	3265.41	-0.298236	0.100189	-2.97673	0.00291342	0.0364353
Clcn7	protein_coding	962.186	-0.29707	0.101166	-2.93646	0.00331977	0.0397798
Tes	protein_coding	4028.7	-0.295729	0.100293	-2.94865	0.00319169	0.0387486
Ppm1m	protein_coding	1863.1	-0.292361	0.0978852	-2.98678	0.00281937	0.0359092
Myo1g	protein_coding	5030.08	-0.275112	0.0951428	-2.89157	0.00383324	0.0434538
Psd4	protein_coding	4093.47	-0.263561	0.0784963	-3.35763	0.000786142	0.015122
Vps4b	protein_coding	2696.77	-0.253923	0.0886224	-2.86523	0.0041671	0.0462464
Paics	protein_coding	2386.39	0.293198	0.0820708	3.5725	0.000353591	0.00878236
Gimap1os	processed_transcript	1465.52	0.296249	0.104378	2.83824	0.00453637	0.0489407
Srrm2	protein_coding	4231.83	0.298112	0.095812	3.11143	0.00186184	0.0267637
Sod2	protein_coding	1635.84	0.31654	0.111704	2.83374	0.00460068	0.0493513
Lysmd2	protein_coding	1044.97	0.334313	0.107784	3.1017	0.00192415	0.02734
Celf1	protein_coding	2325.96	0.341645	0.116009	2.945	0.00322958	0.0389804
Dgkz	protein_coding	1585.57	0.343555	0.106549	3.22437	0.0012625	0.0204978
Btla	protein_coding	1988.19	0.346132	0.11125	3.11131	0.00186262	0.0267637
Zbtb7b	protein_coding	1157.78	0.347778	0.122789	2.83234	0.00462091	0.0493513
Mrps17	protein_coding	1166.7	0.352493	0.120188	2.93284	0.00335874	0.0401307
Pa2g4	protein_coding	2685.27	0.357428	0.101994	3.5044	0.000457631	0.0103466
Tor1aip2	protein_coding	994.513	0.364645	0.114069	3.19672	0.00139	0.0218983
Macf1	protein_coding	3672.07	0.369013	0.0768577	4.80125	1.5768e-06	0.000126418
Tomm5	protein_coding	729.673	0.36981	0.121998	3.03128	0.00243519	0.0324306
Man1a	protein_coding	1206.23	0.371085	0.124824	2.97287	0.00295029	0.0367409
Wdr24	protein_coding	940.274	0.374592	0.094941	3.94552	7.96254e-05	0.00287275
Art2b	protein_coding	3436.41	0.389727	0.128816	3.02545	0.00248261	0.0328822
Ago2	protein_coding	1252.62	0.389748	0.130897	2.9775	0.00290605	0.0364353
Pop5	protein_coding	949.035	0.389821	0.111975	3.48131	0.000498965	0.0108815
Mri1	protein_coding	1060.34	0.394476	0.0998693	3.94992	7.81764e-05	0.00283279
Nup153	protein_coding	1360.52	0.396005	0.128184	3.08933	0.00200606	0.0282141
Stat4	protein_coding	1476.47	0.396786	0.129711	3.059	0.00222081	0.0304097
Ndufab1	protein_coding	484.88	0.397472	0.130633	3.04266	0.00234501	0.0315379
Ndufa1	protein_coding	1141.99	0.403487	0.117862	3.42337	0.000618496	0.0127113
Dync1h1	protein_coding	1267.78	0.406981	0.12398	3.28262	0.00102846	0.0178914
Prmt5	protein_coding	1099.56	0.411456	0.118248	3.4796	0.000502171	0.0109352
Rere	protein_coding	1159	0.413497	0.127246	3.2496	0.00115569	0.0194325
Huwe1	protein_coding	1909.78	0.418528	0.147696	2.83371	0.00460113	0.0493513
Zfp444	protein_coding	698.4	0.419479	0.134953	3.10834	0.00188143	0.0269639
Ddx21	protein_coding	1884.99	0.423383	0.107961	3.92162	8.79567e-05	0.0030796
Nsmce3	protein_coding	614.454	0.424861	0.138332	3.07131	0.00213124	0.0294996
Aatf	protein_coding	1075.59	0.427652	0.127229	3.36128	0.00077582	0.0149889
Ndufb1-ps	bidirectional_promoter_lncRNA	688.221	0.433691	0.131646	3.29436	0.000986446	0.0173992
Tmem126a	protein_coding	688.981	0.434944	0.144553	3.0089	0.00262196	0.0342361
Trat1	protein_coding	2373.07	0.434952	0.130421	3.33497	0.000853074	0.0159502
Scaf1	protein_coding	582.417	0.437029	0.14736	2.96573	0.00301969	0.0373434
Pced1b	protein_coding	984.599	0.438689	0.153134	2.86474	0.00417349	0.0462464
Pycr2	protein_coding	1306.12	0.441343	0.152267	2.89849	0.0037497	0.0428581
Zfp692	protein_coding	695.305	0.441962	0.111311	3.97052	7.17147e-05	0.00265524
Eif4ebp2	protein_coding	1074.06	0.442762	0.138466	3.19762	0.00138567	0.0218807
Ldb1	protein_coding	1035.91	0.443952	0.122145	3.63462	0.000278386	0.00726429
Phykpl	protein_coding	280.256	0.444144	0.152781	2.90706	0.00364847	0.0422541
Usmg5	protein_coding	883.285	0.447931	0.135547	3.30462	0.00095104	0.017008
Apbb1ip	protein_coding	582.041	0.451783	0.140765	3.20948	0.00132974	0.0211966
Usp36	protein_coding	776.118	0.453842	0.151771	2.99032	0.00278687	0.0358256
Uhrf1bp1l	protein_coding	993.62	0.459271	0.142266	3.22826	0.00124546	0.0204245
Aimp2	protein_coding	399.564	0.46058	0.151736	3.0354	0.00240219	0.032073
Ap3s1	protein_coding	411.925	0.464508	0.162723	2.85459	0.00430926	0.0472056
Kri1	protein_coding	288.324	0.464778	0.16406	2.83297	0.00461171	0.0493513
Sdhd	protein_coding	1379.97	0.466006	0.11262	4.13788	3.50533e-05	0.0015682
Mrpl57	protein_coding	655.209	0.47054	0.118446	3.97261	7.10879e-05	0.00263932
Pycard	protein_coding	1449.92	0.472817	0.119157	3.968	7.24773e-05	0.00267296
Tceanc2	protein_coding	452.906	0.476716	0.159801	2.98319	0.00285265	0.0361509
Foxred1	protein_coding	633.3	0.477602	0.16894	2.82705	0.00469789	0.0498191
Fam162a	protein_coding	597.962	0.477862	0.124197	3.84761	0.000119276	0.00390434
Mrpl19	protein_coding	552.071	0.478304	0.119332	4.00818	6.11875e-05	0.00236155
Lage3	protein_coding	377.448	0.47834	0.169213	2.82684	0.00470094	0.0498191
Pkn1	protein_coding	681.157	0.482446	0.150587	3.20378	0.00135637	0.0215204
Nob1	protein_coding	968.164	0.486294	0.139605	3.48335	0.000495182	0.010849
Rbm15	protein_coding	743.244	0.486949	0.155524	3.13103	0.00174196	0.0256789
Abhd11	protein_coding	630.729	0.487074	0.163829	2.97306	0.0029485	0.0367409
Fam114a2	protein_coding	1181.73	0.487467	0.164495	2.96342	0.00304241	0.0375061
Nup93	protein_coding	691.713	0.488245	0.156907	3.11169	0.0018602	0.0267637
Kmt2c	protein_coding	1230.15	0.490176	0.155066	3.16108	0.00157183	0.0239528
Ctdsp2	protein_coding	512.67	0.492646	0.138189	3.56501	0.000363844	0.00889884
Mknk2	protein_coding	1192.4	0.492652	0.123121	4.00135	6.29824e-05	0.00241678
Herc2	protein_coding	764.108	0.497099	0.141245	3.51942	0.000432491	0.00996891
Ankrd11	protein_coding	895.792	0.497583	0.162004	3.07143	0.00213038	0.0294996
Noa1	protein_coding	607.293	0.498067	0.135135	3.6857	0.000228076	0.00631285
Ubr4	protein_coding	1732.22	0.498486	0.15461	3.22414	0.00126351	0.0204978
Npepl1	protein_coding	747.08	0.499837	0.127239	3.92835	8.55318e-05	0.00302018
Rnaseh1	protein_coding	398.209	0.500986	0.169067	2.96324	0.00304415	0.0375061
3830406C13Rik	protein_coding	477.973	0.501208	0.155318	3.22699	0.00125101	0.0204298
Mycbp2	protein_coding	2051.31	0.502977	0.135099	3.72302	0.000196852	0.00567179
Nfatc3	protein_coding	1072.02	0.503964	0.153493	3.2833	0.001026	0.017886
Mprip	protein_coding	483.719	0.50821	0.178822	2.84199	0.00448328	0.0486622
Nktr	protein_coding	1225.96	0.508669	0.125314	4.05914	4.92529e-05	0.0020229
Aacs	protein_coding	1335.61	0.508851	0.166121	3.06313	0.00219033	0.0300916
Clcn3	protein_coding	700.106	0.51256	0.12875	3.98104	6.86157e-05	0.00256474
Mtrr	protein_coding	475.372	0.514092	0.179952	2.85683	0.004279	0.0469982
Wdr75	protein_coding	809.013	0.515947	0.165639	3.1149	0.00184009	0.0265319
Chchd4	protein_coding	376.888	0.516862	0.161667	3.19709	0.00138823	0.0218983
Gnl3	protein_coding	1322.57	0.516899	0.146914	3.51838	0.000434184	0.00998021
Gstp3	protein_coding	1093.09	0.520041	0.127631	4.07457	4.60987e-05	0.00191743
Slc19a1	protein_coding	638.912	0.523722	0.167287	3.13067	0.00174406	0.0256827
Zdhhc18	protein_coding	782.306	0.527482	0.153132	3.44462	0.000571858	0.0120592
Atad3a	protein_coding	1103.27	0.528551	0.125034	4.22728	2.36538e-05	0.00115458
Srebf1	protein_coding	2569.17	0.529204	0.1551	3.41202	0.000644843	0.0130989
Mettl14	protein_coding	454.217	0.529229	0.153444	3.44901	0.000562651	0.0119104
Alkbh5	protein_coding	1864.63	0.532952	0.180497	2.95268	0.00315023	0.0384028
Emb	protein_coding	3579.83	0.533993	0.15331	3.48309	0.00049567	0.010849
Rgp1	protein_coding	507.26	0.535358	0.149837	3.57293	0.000353012	0.00878236
Bach2	protein_coding	684.477	0.537079	0.179413	2.99353	0.0027577	0.0356162
Lnpep	protein_coding	1545.48	0.537641	0.147082	3.65539	0.000256789	0.00684056
Fastkd2	protein_coding	352.865	0.538161	0.160601	3.35092	0.00080545	0.0153235
Epn1	protein_coding	334.777	0.53951	0.146605	3.68002	0.000233214	0.00640799
Etf1	protein_coding	1750.13	0.543963	0.138449	3.92897	8.53101e-05	0.00301878
Pola2	protein_coding	687.258	0.54599	0.193111	2.82734	0.0046936	0.0498191
Pno1	protein_coding	475.312	0.547672	0.159208	3.43998	0.000581755	0.0122523
Srm	protein_coding	1204.68	0.54929	0.134119	4.09554	4.21182e-05	0.0018203
Spen	protein_coding	346.197	0.555062	0.179562	3.0912	0.00199353	0.0281092
Hnrnpd	protein_coding	338.597	0.555292	0.180642	3.07399	0.00211215	0.0292843
Usp18	protein_coding	2317.75	0.55596	0.166238	3.34435	0.000824743	0.0155893
Ybx1	protein_coding	3328.36	0.558122	0.193265	2.88786	0.00387878	0.0438802
Cyp4f17	protein_coding	259.103	0.56254	0.16986	3.31178	0.000927043	0.0167778
Irak1	protein_coding	356.481	0.562631	0.175477	3.2063	0.00134454	0.021394
Sigmar1	protein_coding	665.714	0.563061	0.174553	3.22574	0.00125649	0.0204838
Desi2	protein_coding	492.473	0.565431	0.194109	2.91295	0.00358027	0.0417849
Tnfsf11	protein_coding	759.39	0.566259	0.191787	2.95255	0.00315164	0.0384028
Psmg3	protein_coding	206.648	0.567428	0.18881	3.00529	0.00265332	0.0345783
Cul3	protein_coding	449.258	0.567908	0.160623	3.53565	0.000406772	0.00952157
Rnf213	protein_coding	1346.96	0.569617	0.192252	2.96287	0.00304787	0.0375241
CAAA01118383.1	protein_coding	372.974	0.569787	0.180286	3.16046	0.0015752	0.0239615
Gm17018	protein_coding	362.743	0.573247	0.162994	3.51699	0.000436477	0.0100052
Ric1	protein_coding	370.602	0.573407	0.169977	3.37344	0.000742345	0.0144431
Trim28	protein_coding	837.115	0.57444	0.167292	3.43376	0.000595262	0.012422
Ankib1	protein_coding	422.967	0.575533	0.167779	3.43032	0.00060288	0.0125224
Atp2b1	protein_coding	2540.13	0.581146	0.149675	3.88272	0.000103293	0.00347015
Bicdl1	protein_coding	306.046	0.581199	0.168052	3.45845	0.000543292	0.0116342
Acot7	protein_coding	1259.8	0.584241	0.161504	3.61751	0.000297446	0.00760619
Rictor	protein_coding	645.851	0.585353	0.206271	2.83779	0.00454272	0.0489551
Snord78	snoRNA	180.038	0.585402	0.174383	3.35698	0.00078798	0.0151245
Kpnb1	protein_coding	785.524	0.588143	0.132881	4.4261	9.59529e-06	0.000566713
Arf6	protein_coding	400.519	0.589627	0.191624	3.07699	0.00209101	0.0290397
Gpr137	protein_coding	244.768	0.592474	0.208058	2.84764	0.00440442	0.0479631
Hmgcr	protein_coding	2029.43	0.594152	0.126373	4.70157	2.58166e-06	0.00019387
Cep83	protein_coding	240.172	0.594265	0.205439	2.89265	0.00382004	0.0433339
Prrc2a	protein_coding	1608.4	0.595728	0.114722	5.1928	2.0715e-07	2.28902e-05
Nudt3	protein_coding	306.195	0.596474	0.169619	3.51656	0.000437182	0.0100075
Hdac7	protein_coding	1905.97	0.598585	0.153466	3.90044	9.60168e-05	0.00326536
Crebl2	protein_coding	202.2	0.602512	0.202284	2.97854	0.00289626	0.0364139
Arl4c	protein_coding	859.366	0.603845	0.163542	3.69229	0.00022224	0.00620926
Birc6	protein_coding	2361.1	0.606976	0.108643	5.58691	2.31141e-08	3.28824e-06
Rnf126	protein_coding	295.436	0.607616	0.203748	2.9822	0.00286189	0.0361509
Stk26	protein_coding	791.079	0.61046	0.18711	3.26257	0.00110409	0.0188706
Fam120a	protein_coding	812.298	0.611043	0.158778	3.84842	0.000118881	0.00390152
Ccdc6	protein_coding	494.944	0.611341	0.209443	2.91889	0.00351285	0.0411718
Myc	protein_coding	4741.61	0.611715	0.16058	3.80941	0.000139301	0.00445501
Alas1	protein_coding	420.386	0.612617	0.194325	3.15254	0.00161855	0.0244863
Shmt1	protein_coding	338.257	0.614664	0.199699	3.07795	0.00208428	0.0289801
Lap3	protein_coding	530.123	0.615323	0.163045	3.77395	0.000160685	0.00497524
Als2cl	protein_coding	1158.85	0.617278	0.168632	3.6605	0.000251726	0.00678188
Wdr26	protein_coding	897.899	0.617446	0.16381	3.76928	0.000163722	0.00504105
Gm11131	antisense	288.297	0.619722	0.206706	2.99808	0.00271684	0.0351705
2810004N23Rik	protein_coding	480.48	0.621693	0.144468	4.30331	1.68265e-05	0.000869945
Igfbp4	protein_coding	3706.25	0.623552	0.208399	2.9921	0.00277066	0.0357373
Dusp6	protein_coding	769.007	0.624858	0.199571	3.131	0.0017421	0.0256789
Psme3	protein_coding	1067.43	0.626591	0.220904	2.83648	0.00456138	0.0490639
Kcnq1ot1	antisense	883.203	0.627681	0.16761	3.74489	0.000180473	0.00535208
Tjap1	protein_coding	565.199	0.631007	0.18443	3.42139	0.000623015	0.0127649
Rc3h1	protein_coding	712.486	0.631146	0.135142	4.67024	3.00847e-06	0.00021995
Cdkn1b	protein_coding	1172.11	0.6313	0.154346	4.09016	4.31072e-05	0.00183323
Taf1d	protein_coding	516.089	0.631588	0.190457	3.31617	0.00091259	0.0166799
Usp34	protein_coding	732.038	0.631681	0.177864	3.55148	0.00038307	0.00923802
Ppp3cc	protein_coding	240.046	0.632373	0.21944	2.88176	0.00395459	0.0444952
Smn1	protein_coding	541.043	0.636181	0.170814	3.72441	0.000195773	0.00565052
Rab3a	protein_coding	204.971	0.638279	0.219022	2.91422	0.00356575	0.0416714
Gm34220	TEC	175.668	0.640936	0.206859	3.09841	0.00194559	0.0275739
Msmo1	protein_coding	1471.48	0.640957	0.108521	5.90629	3.49898e-09	6.24398e-07
Dph5	protein_coding	1007.81	0.64191	0.136485	4.70317	2.56159e-06	0.000193237
Ubxn11	protein_coding	484.099	0.644683	0.172601	3.73509	0.000187645	0.00551177
D6Wsu163e	protein_coding	175.334	0.644921	0.211145	3.0544	0.0022551	0.0305987
I730030J21Rik	processed_transcript	676.518	0.645973	0.199833	3.23256	0.00122686	0.0201794
Themis	protein_coding	1088.44	0.647504	0.148561	4.3585	1.30957e-05	0.000724451
Hnrnpl	protein_coding	505.425	0.648888	0.201409	3.22175	0.0012741	0.0205891
Fmc1	protein_coding	148.354	0.650557	0.216555	3.00412	0.00266353	0.0346154
Tnfrsf14	protein_coding	181.955	0.652558	0.221544	2.9455	0.00322428	0.0389602
A430093F15Rik	processed_transcript	707.25	0.654415	0.175658	3.72551	0.00019492	0.00563569
Ece1	protein_coding	803.913	0.65541	0.17302	3.78806	0.000151829	0.00474529
Ring1	protein_coding	561.134	0.655663	0.19528	3.35756	0.00078635	0.015122
Qtrt1	protein_coding	326.64	0.656508	0.213301	3.07785	0.00208497	0.0289801
Snhg5	processed_transcript	638.389	0.657849	0.189314	3.47492	0.000511005	0.0110713
Hnrnpa0	protein_coding	169.329	0.658881	0.219467	3.00219	0.00268043	0.0348078
Cisd1	protein_coding	328.393	0.661586	0.210692	3.14006	0.00168915	0.0252324
Rflnb	protein_coding	650.378	0.664134	0.196453	3.38062	0.000723218	0.0142379
Atp5s	protein_coding	179.68	0.664451	0.223174	2.97728	0.0029082	0.0364353
Dus2	protein_coding	383.801	0.667219	0.232091	2.87481	0.00404268	0.045302
Daglb	protein_coding	362.838	0.668208	0.189977	3.51731	0.000435951	0.0100052
Mid1ip1	protein_coding	354.685	0.672683	0.159537	4.21647	2.4816e-05	0.00119723
Phf12	protein_coding	346.878	0.674234	0.179556	3.755	0.000173338	0.00522092
Ptpn9	protein_coding	232.941	0.676874	0.228478	2.96253	0.00305121	0.0375373
Sympk	protein_coding	336.237	0.678134	0.20357	3.33121	0.000864698	0.01607
Adgrl1	protein_coding	207.242	0.678526	0.183721	3.69323	0.000221424	0.00620288
2700038G22Rik	lincRNA	118.91	0.680037	0.211317	3.21809	0.00129047	0.0207929
5430405H02Rik	processed_transcript	126.185	0.680044	0.240348	2.82941	0.00466339	0.0495795
Usp7	protein_coding	627.352	0.680225	0.207081	3.28483	0.00102043	0.0178076
Trim56	protein_coding	545.649	0.680418	0.187473	3.62941	0.000284069	0.00737779
Cox10	protein_coding	517.924	0.681063	0.184074	3.69994	0.000215653	0.00610748
Capn10	protein_coding	234.191	0.684952	0.209034	3.27675	0.00105009	0.0181346
Eif4g3	protein_coding	1155.3	0.687361	0.211182	3.25483	0.0011346	0.0192289
Nsdhl	protein_coding	510.256	0.690337	0.158891	4.34472	1.39451e-05	0.000756315
Prim1	protein_coding	251.455	0.691434	0.228852	3.02132	0.00251674	0.0331491
Cpm	protein_coding	984.786	0.691933	0.167455	4.13206	3.59527e-05	0.00160395
Usf3	protein_coding	268.23	0.695851	0.237637	2.92821	0.00340923	0.0404036
Mettl1	protein_coding	216.25	0.700986	0.187986	3.72893	0.000192294	0.00558336
Cox16	protein_coding	292.758	0.701281	0.206855	3.39021	0.000698391	0.0138975
Dusp5	protein_coding	1261.25	0.703894	0.228654	3.07842	0.00208098	0.0289737
Sfxn1	protein_coding	1064.51	0.704561	0.148338	4.74971	2.03708e-06	0.000157978
Tmem104	protein_coding	404.127	0.704617	0.235517	2.99178	0.00277353	0.0357373
Tnfrsf22	protein_coding	471.525	0.705138	0.173595	4.06196	4.86619e-05	0.00200395
Gcsh	protein_coding	322.859	0.705155	0.16017	4.40255	1.06985e-05	0.000618651
Acsf3	protein_coding	307.635	0.706009	0.217339	3.24842	0.00116049	0.0194488
Tmem256	protein_coding	321.771	0.706132	0.218284	3.23492	0.00121675	0.0200601
Tpi1	protein_coding	1528.05	0.712497	0.186478	3.82081	0.000133013	0.00426981
B230354K17Rik	bidirectional_promoter_lncRNA	190.776	0.712558	0.252059	2.82695	0.00469935	0.0498191
Gm23187	snoRNA	107.558	0.712735	0.250084	2.84998	0.00437221	0.0477063
D17H6S53E	protein_coding	343.563	0.712903	0.204316	3.48921	0.000484444	0.0107198
Rock2	protein_coding	281.85	0.713963	0.180898	3.94677	7.92131e-05	0.0028641
Cmss1	protein_coding	149.721	0.714039	0.244458	2.92091	0.00349015	0.0409636
Sart1	protein_coding	479.455	0.718255	0.177506	4.04638	5.20153e-05	0.00211063
G6pc3	protein_coding	293.277	0.719123	0.217745	3.3026	0.000957946	0.0170763
Setd5	protein_coding	407.953	0.72217	0.17977	4.0172	5.88942e-05	0.00231066
Stard4	protein_coding	370.421	0.724401	0.150987	4.79776	1.60446e-06	0.000127405
Rcc2	protein_coding	518.46	0.726956	0.244815	2.9694	0.00298377	0.0370649
Tfdp1	protein_coding	576.193	0.728239	0.205965	3.53575	0.000406619	0.00952157
Fdft1	protein_coding	1198.62	0.728381	0.118492	6.14706	7.89308e-10	1.87134e-07
Fads1	protein_coding	379.768	0.72955	0.181115	4.0281	5.62287e-05	0.00224327
Timm9	protein_coding	315.161	0.732053	0.160423	4.56327	5.03639e-06	0.000334335
5830444F18Rik	TEC	142.022	0.733486	0.25456	2.88139	0.00395929	0.0445179
Tfap4	protein_coding	225.74	0.733593	0.206295	3.55603	0.000376502	0.00912717
Arhgef10	protein_coding	375.594	0.737104	0.238707	3.08791	0.00201569	0.0283016
Ppp4r1	protein_coding	418.98	0.73999	0.213885	3.45976	0.000540652	0.0115926
Thy1	protein_coding	1294.4	0.740039	0.115102	6.42944	1.28076e-10	3.4283e-08
Jak2	protein_coding	669.993	0.741709	0.161585	4.5902	4.42817e-06	0.000303677
Rpp38	protein_coding	179.19	0.742569	0.225369	3.2949	0.00098457	0.0173992
Igsf23	protein_coding	476.889	0.74454	0.181257	4.10765	3.99698e-05	0.00174391
1110038B12Rik	processed_transcript	157.81	0.746921	0.245362	3.04415	0.00233336	0.0314322
Clock	protein_coding	313.044	0.751462	0.239379	3.13921	0.00169401	0.025265
Gar1	protein_coding	291.62	0.753237	0.198722	3.79041	0.000150402	0.0047274
Rbm26	protein_coding	406.447	0.753766	0.236056	3.19316	0.00140723	0.0220817
Rab21	protein_coding	305.305	0.754564	0.208221	3.62386	0.000290239	0.00748583
Urb1	protein_coding	272.659	0.75591	0.250393	3.01889	0.00253701	0.0333366
Mrpl27	protein_coding	361.018	0.760356	0.175523	4.33196	1.4779e-05	0.000791203
Art2a-ps	polymorphic_pseudogene	353.108	0.760389	0.157008	4.84301	1.27887e-06	0.000106121
Ydjc	protein_coding	180.322	0.761071	0.235857	3.22683	0.0012517	0.0204298
1190007I07Rik	protein_coding	211.61	0.764318	0.208326	3.66886	0.000243635	0.0066068
Acsl3	protein_coding	354.793	0.766298	0.216815	3.53434	0.000408788	0.00955528
Acvrl1	protein_coding	217.381	0.767615	0.250005	3.0704	0.00213775	0.029565
Cd40lg	protein_coding	586.918	0.767971	0.196862	3.90107	9.57676e-05	0.00326536
Dpp7	protein_coding	349.82	0.774173	0.20828	3.71699	0.000201613	0.00574834
Abhd2	protein_coding	878.185	0.777844	0.185489	4.19348	2.74705e-05	0.00130631
Snhg6	lincRNA	300.948	0.779101	0.178391	4.36738	1.25747e-05	0.000702657
Tmem38b	protein_coding	191.158	0.784896	0.255835	3.06798	0.0021551	0.0297308
Fbrs	protein_coding	304.992	0.786727	0.216426	3.63508	0.000277889	0.00726276
Fbxw17	protein_coding	250.412	0.788275	0.266462	2.9583	0.00309338	0.0378596
Slc39a4	protein_coding	520.155	0.796105	0.229085	3.47515	0.000510559	0.0110713
Dusp10	protein_coding	941.475	0.802275	0.172062	4.66269	3.12095e-06	0.000227077
Zfas1	processed_transcript	391.601	0.803105	0.148957	5.39154	6.98583e-08	8.652e-06
Snhg12	lincRNA	117.976	0.805691	0.270124	2.98267	0.0028575	0.0361509
Arap2	protein_coding	996.47	0.808846	0.163547	4.94566	7.58872e-07	6.84469e-05
Mvd	protein_coding	901.81	0.809613	0.165819	4.88252	1.04736e-06	9.10054e-05
Zcchc2	protein_coding	265.454	0.815592	0.281348	2.89888	0.00374503	0.0428343
Gpt	protein_coding	152.605	0.817578	0.25246	3.23844	0.00120184	0.0199258
Wtap	protein_coding	2039.04	0.822815	0.150555	5.46521	4.62359e-08	6.04198e-06
Tmem238	protein_coding	204.593	0.827967	0.286593	2.889	0.00386467	0.0437504
Cited2	protein_coding	218.916	0.828793	0.215852	3.83964	0.000123217	0.00400178
Zfc3h1	protein_coding	700.598	0.831666	0.200438	4.14923	3.3359e-05	0.00152514
Pfas	protein_coding	513.272	0.832532	0.169158	4.92162	8.58313e-07	7.65837e-05
Mfhas1	protein_coding	250.313	0.832913	0.200353	4.15723	3.22133e-05	0.00148917
Cyp51	protein_coding	1792.74	0.833352	0.16704	4.98894	6.07107e-07	5.6924e-05
Cd3eap	protein_coding	233.667	0.834971	0.204968	4.07366	4.62799e-05	0.00192015
Chd7	protein_coding	630.065	0.835849	0.240853	3.47037	0.000519746	0.0112168
Ccdc28b	protein_coding	185.832	0.84177	0.277735	3.03084	0.00243874	0.0324306
Ppp1r14b	protein_coding	122.914	0.844526	0.257646	3.27785	0.00104601	0.018083
Rasa1	protein_coding	759.138	0.846717	0.195955	4.32097	1.55347e-05	0.000815868
Hmgcs1	protein_coding	1281.79	0.85021	0.191517	4.43934	9.02363e-06	0.000544568
Ifrd2	protein_coding	404.707	0.850496	0.174947	4.86143	1.16538e-06	0.000100105
Bmp2k	protein_coding	330.731	0.851948	0.235294	3.62079	0.000293708	0.00754547
Iffo2	protein_coding	79.3603	0.852901	0.300925	2.83426	0.00459313	0.0493501
Ung	protein_coding	261.653	0.858074	0.183491	4.67639	2.91968e-06	0.000215355
Ccnk	protein_coding	171.729	0.860549	0.287058	2.99783	0.00271912	0.0351727
Utp20	protein_coding	264.201	0.865383	0.185188	4.67299	2.96849e-06	0.000217987
Qtrt2	protein_coding	193.619	0.865411	0.251612	3.43946	0.000582866	0.0122601
Dhcr24	protein_coding	87.3739	0.865487	0.297498	2.90922	0.00362337	0.0420808
Gm3571	processed_pseudogene	142.981	0.867748	0.20311	4.27231	1.93461e-05	0.000967071
Hdhd2	protein_coding	76.593	0.8688	0.304966	2.84884	0.00438789	0.0478144
Mboat1	protein_coding	222.544	0.870056	0.284015	3.06341	0.0021883	0.0300886
2900005J15Rik	processed_transcript	281.721	0.870261	0.271917	3.20047	0.00137206	0.0217071
Suds3	protein_coding	215.32	0.890045	0.307534	2.89414	0.00380204	0.0432183
Snhg15	processed_transcript	234.305	0.891625	0.169525	5.25954	1.44418e-07	1.67606e-05
Gsk3a	protein_coding	64.818	0.894295	0.312137	2.86508	0.0041691	0.0462464
9330162G02Rik	TEC	205.191	0.896081	0.297474	3.0123	0.00259274	0.0339346
Pole2	protein_coding	71.0629	0.901368	0.314087	2.8698	0.00410729	0.0458404
Rec8	protein_coding	335.749	0.905835	0.304076	2.97897	0.00289218	0.0364139
Zfp691	protein_coding	110.414	0.906241	0.289568	3.12963	0.00175025	0.0257281
Pan3	protein_coding	1007.23	0.910571	0.168705	5.3974	6.76137e-08	8.43697e-06
Extl2	protein_coding	132.901	0.91097	0.320864	2.83912	0.00452382	0.0489058
Uros	protein_coding	588.199	0.911046	0.200163	4.55152	5.32589e-06	0.000349361
Acaca	protein_coding	240.075	0.913215	0.285708	3.19632	0.00139194	0.0218983
BC024978	protein_coding	94.3588	0.913482	0.293123	3.11638	0.00183087	0.0264528
Egr3	protein_coding	114.674	0.915494	0.278215	3.2906	0.000999754	0.017539
Pag1	protein_coding	528.426	0.917764	0.228603	4.01466	5.95312e-05	0.00232466
Plekha5	protein_coding	193.262	0.918333	0.321185	2.8592	0.00424713	0.046803
Fdps	protein_coding	128.104	0.927313	0.218338	4.24715	2.16505e-05	0.00106646
1810032O08Rik	processed_transcript	193.025	0.928438	0.237865	3.90322	9.49212e-05	0.00325478
Ldlr	protein_coding	1833.63	0.937176	0.182248	5.1423	2.71391e-07	2.815e-05
Gm26637	lincRNA	113.273	0.938567	0.322501	2.91028	0.00361109	0.0420264
Fam102b	protein_coding	118.196	0.940294	0.284003	3.31086	0.000930086	0.0167962
Insig1	protein_coding	1153.8	0.941783	0.155936	6.03953	1.54563e-09	3.09052e-07
Car12	protein_coding	199.109	0.944561	0.215656	4.37994	1.18712e-05	0.000667845
Ptger2	protein_coding	1343.89	0.946441	0.161305	5.86739	4.42721e-09	7.81637e-07
Scpep1	protein_coding	308.177	0.946983	0.270517	3.50065	0.000464128	0.0104231
Snhg1	processed_transcript	343.508	0.947496	0.183701	5.15781	2.49861e-07	2.6201e-05
BC048403	protein_coding	138.549	0.951087	0.320212	2.97018	0.00297623	0.0369989
2310022B05Rik	protein_coding	167.232	0.95379	0.280939	3.39501	0.000686273	0.0137387
Cnpy4	protein_coding	417.768	0.964872	0.284349	3.39327	0.000690638	0.0137762
Rasgrp4	protein_coding	374.267	0.966056	0.151821	6.36313	1.97681e-10	5.20748e-08
Tent5a	protein_coding	556.3	0.967294	0.165822	5.83332	5.43342e-09	9.29619e-07
Atg9b	protein_coding	169.904	0.974482	0.284223	3.42859	0.000606735	0.0125553
Zfp365	protein_coding	153.804	0.975405	0.305671	3.19103	0.00141769	0.0222171
Ube2q1	protein_coding	209.999	0.976922	0.277005	3.52674	0.000420713	0.00972446
Pygm	protein_coding	118.975	0.977836	0.274263	3.56533	0.000363406	0.00889884
Csnk1e	protein_coding	107.803	0.980282	0.294601	3.32749	0.000876337	0.0162137
Oas2	protein_coding	255.287	0.984813	0.302279	3.25796	0.00112217	0.0190619
AC121821.1	processed_transcript	83.1989	0.987825	0.29485	3.35026	0.000807353	0.0153305
Mvb12b	protein_coding	79.59	0.988334	0.297744	3.31941	0.000902076	0.0165825
Mtln	protein_coding	194.461	0.989504	0.226068	4.37702	1.20313e-05	0.000674566
Mccc2	protein_coding	198.292	0.993846	0.254331	3.90769	9.31823e-05	0.00321508
Ssh3	protein_coding	232.988	0.994538	0.278884	3.56613	0.000362291	0.00889884
Abcb9	protein_coding	862.299	0.995042	0.148399	6.70519	2.01139e-11	6.29829e-09
Cmtr2	protein_coding	198.096	0.996966	0.303963	3.2799	0.00103844	0.0180084
Spaca1	protein_coding	63.5996	1.00766	0.338286	2.97872	0.00289454	0.0364139
Kdm8	protein_coding	155.631	1.00997	0.351148	2.87618	0.00402515	0.0451666
B630019A10Rik	antisense	466.886	1.01451	0.139863	7.25361	4.05818e-13	1.77236e-10
Pcsk4	protein_coding	418.749	1.01729	0.197267	5.15694	2.51022e-07	2.6201e-05
Xrcc3	protein_coding	102.173	1.01733	0.322485	3.15466	0.00160684	0.0243986
Tm7sf2	protein_coding	210.87	1.02042	0.255035	4.00108	6.30552e-05	0.00241678
Fasl	protein_coding	153.003	1.02128	0.289554	3.52708	0.000420175	0.00972446
Tbl1x	protein_coding	1896.33	1.02386	0.103362	9.90552	3.93924e-23	7.26396e-20
Abca1	protein_coding	346.029	1.02468	0.2984	3.4339	0.000594957	0.012422
Gm42047	lincRNA	81.0718	1.02849	0.363776	2.82727	0.00469472	0.0498191
Hsd17b7	protein_coding	214.157	1.03079	0.288759	3.56971	0.000357379	0.00885234
Gm35363	lincRNA	190.487	1.03147	0.242602	4.25168	2.12171e-05	0.0010511
Slc39a1	protein_coding	817.854	1.0375	0.146102	7.10117	1.23703e-12	5.07509e-10
Gm6781	processed_pseudogene	105.639	1.04425	0.267932	3.89744	9.72161e-05	0.00328594
Trav9-2	TR_V_gene	316.212	1.04734	0.311998	3.35687	0.000788306	0.0151245
Samd4b	protein_coding	131.169	1.04875	0.296351	3.53887	0.000401842	0.00947297
Gm17066	processed_transcript	108.642	1.0544	0.323304	3.26131	0.00110899	0.018935
Rcbtb2	protein_coding	1448.63	1.05536	0.171893	6.13962	8.27194e-10	1.90668e-07
Scarb1	protein_coding	245.217	1.06253	0.247928	4.28566	1.82199e-05	0.000930392
Ccdc17	protein_coding	214.836	1.07036	0.265724	4.0281	5.62304e-05	0.00224327
Sik1	protein_coding	164.281	1.07042	0.371584	2.8807	0.00396793	0.0445848
Hsf2	protein_coding	170.9	1.0758	0.265209	4.05642	4.98299e-05	0.00203188
Bbs9	protein_coding	318.485	1.08373	0.265593	4.08041	4.49568e-05	0.00188887
Socs7	protein_coding	124.283	1.08532	0.363171	2.98844	0.00280401	0.0359092
Mvk	protein_coding	311.821	1.08739	0.203689	5.33849	9.37247e-08	1.12714e-05
Sema4a	protein_coding	1048.49	1.09146	0.191257	5.70678	1.15136e-08	1.83731e-06
6720489N17Rik	protein_coding	56.5597	1.09725	0.387393	2.83239	0.00462008	0.0493513
Trak1	protein_coding	386.522	1.09867	0.135059	8.13475	4.1278e-16	2.7402e-13
Gm49616	TEC	237.994	1.10177	0.36891	2.98654	0.0028215	0.0359092
Tmem97	protein_coding	213.274	1.10229	0.244868	4.50155	6.74598e-06	0.000432264
Bcl6	protein_coding	574.79	1.11522	0.27637	4.03525	5.45445e-05	0.00218909
Gm31718	lincRNA	275.636	1.12211	0.381782	2.93915	0.00329117	0.0396086
Gngt2	protein_coding	188.078	1.12246	0.229223	4.89678	9.74206e-07	8.55445e-05
Sqle	protein_coding	1405.87	1.12797	0.12461	9.05199	1.40387e-19	1.55324e-16
Osgin1	protein_coding	604.391	1.13369	0.189644	5.97799	2.25905e-09	4.30934e-07
Gm42646	TEC	265.428	1.13422	0.169417	6.69483	2.15921e-11	6.63598e-09
Dlgap5	protein_coding	130.347	1.13848	0.36139	3.1503	0.00163106	0.0246082
Palm3	protein_coding	40.879	1.14638	0.404484	2.83419	0.00459423	0.0493501
Nrip1	protein_coding	930.055	1.15356	0.174278	6.61906	3.6148e-11	1.07127e-08
Trio	protein_coding	154.94	1.15757	0.319277	3.6256	0.00028829	0.00745243
Gimap7	protein_coding	4436.66	1.15815	0.149788	7.73192	1.0594e-14	5.8606e-12
Gm17173	antisense	183.68	1.16053	0.266863	4.34878	1.36895e-05	0.00074746
Hist1h2bc	protein_coding	87.3185	1.16105	0.325625	3.56561	0.000363008	0.00889884
Neb	protein_coding	620.074	1.16652	0.275856	4.22871	2.35032e-05	0.00115062
Chek2	protein_coding	81.2799	1.17454	0.378982	3.09919	0.00194053	0.0275256
Ncf1	protein_coding	450.312	1.17586	0.26097	4.50573	6.61463e-06	0.00042549
Pex26	protein_coding	139.528	1.18355	0.316112	3.74408	0.000181055	0.00535208
Gm13546	antisense	149.86	1.19935	0.241289	4.97057	6.67557e-07	6.12087e-05
Il18r1	protein_coding	373.575	1.20304	0.228279	5.27003	1.36405e-07	1.59565e-05
Gm13502	processed_pseudogene	198.503	1.2047	0.22969	5.24488	1.56386e-07	1.80235e-05
Gm11725	antisense	88.0084	1.22342	0.368517	3.31986	0.000900622	0.0165825
Akap1	protein_coding	63.1608	1.22495	0.358741	3.41458	0.000638796	0.012992
Lss	protein_coding	347.622	1.22588	0.215528	5.68779	1.28691e-08	2.01486e-06
Arhgef39	protein_coding	59.9941	1.24529	0.387617	3.21269	0.00131498	0.0211058
Clybl	protein_coding	116.146	1.24574	0.378442	3.29177	0.000995588	0.0175215
Itgb3	protein_coding	942.687	1.25064	0.180736	6.91974	4.52481e-12	1.66069e-09
Tk1	protein_coding	178.499	1.25769	0.415137	3.02957	0.00244899	0.0325148
Idi1	protein_coding	624.3	1.26216	0.183006	6.89683	5.3177e-12	1.87772e-09
Gna15	protein_coding	582.556	1.26283	0.200979	6.28339	3.31266e-10	8.59014e-08
Gm37593	TEC	60.2153	1.26329	0.377021	3.35071	0.000806061	0.0153235
Vipr1	protein_coding	284.356	1.28596	0.206228	6.23565	4.49905e-10	1.13131e-07
Hist1h2ac	protein_coding	67.404	1.29296	0.445484	2.90236	0.00370359	0.0425362
Bhlhe40	protein_coding	519.973	1.29598	0.40003	3.2397	0.00119653	0.0198577
Pde3b	protein_coding	73.6813	1.30289	0.451458	2.88595	0.00390233	0.0440865
Thra	protein_coding	102.477	1.31017	0.31634	4.14167	3.44793e-05	0.00155494
Stra6	protein_coding	204.317	1.31519	0.28963	4.54095	5.60016e-06	0.000365906
Repin1	protein_coding	105.892	1.32088	0.415384	3.1799	0.00147325	0.0228078
Snord104	snoRNA	74.4493	1.32841	0.336253	3.95063	7.79444e-05	0.00283056
Gpr183	protein_coding	3506.46	1.32869	0.118457	11.2166	3.37957e-29	9.34788e-26
Rdh10	protein_coding	103.646	1.32923	0.406887	3.26683	0.00108761	0.0186466
Bcat1	protein_coding	104.744	1.33299	0.463363	2.87677	0.00401767	0.0451132
Gm42856	TEC	51.9874	1.33486	0.455872	2.92816	0.00340978	0.0404036
Zfp608	protein_coding	78.7925	1.34108	0.343799	3.90076	9.58896e-05	0.00326536
AA465934	processed_transcript	61.8875	1.34381	0.348188	3.85944	0.000113646	0.00377215
Arglu1	protein_coding	753.259	1.34386	0.175349	7.66388	1.80392e-14	8.80525e-12
Abhd14a	protein_coding	167.066	1.34495	0.306336	4.39043	1.13128e-05	0.000645047
Phtf1os	antisense	41.1013	1.35331	0.465636	2.90637	0.0036565	0.0423175
Gm5113	lincRNA	58.4731	1.35664	0.478002	2.83814	0.00453774	0.0489407
Id2	protein_coding	1512.61	1.35829	0.201751	6.7325	1.66771e-11	5.53548e-09
Gm35570	processed_pseudogene	36.5869	1.36641	0.390235	3.5015	0.000462639	0.0104178
E130317F20Rik	bidirectional_promoter_lncRNA	50.0121	1.38212	0.435653	3.17253	0.00151118	0.0233298
Ppp2cb	protein_coding	72.1514	1.38888	0.389884	3.5623	0.000367623	0.00897215
Tmem140	protein_coding	34.897	1.39179	0.446211	3.11914	0.0018138	0.0263445
Rapgef4	protein_coding	118.81	1.39392	0.343477	4.05825	4.94415e-05	0.0020229
1700113A16Rik	antisense	27.2981	1.39952	0.475315	2.9444	0.00323583	0.0390275
Gm12940	processed_transcript	287.014	1.40685	0.217383	6.47173	9.68863e-11	2.63594e-08
Gm37169	TEC	89.8932	1.41085	0.323198	4.36528	1.26958e-05	0.000707043
Mirt1	lincRNA	145.229	1.41288	0.294372	4.79966	1.58938e-06	0.000126814
Gm19705	lincRNA	79.0609	1.41746	0.353434	4.01053	6.05815e-05	0.00234909
Podnl1	protein_coding	505.705	1.45384	0.331539	4.38514	1.1591e-05	0.000654299
Zfp523	protein_coding	100.073	1.46044	0.367858	3.97012	7.18367e-05	0.00265524
Gm39323	lincRNA	135.062	1.47263	0.405981	3.62734	0.000286353	0.00742549
Gm19585	lincRNA	770.644	1.48541	0.155032	9.58134	9.5794e-22	1.22292e-18
Mfsd2a	protein_coding	75.0558	1.51249	0.40067	3.77491	0.000160064	0.00496528
Fgd6	protein_coding	83.135	1.52818	0.406795	3.75664	0.000172212	0.00522092
Gm42908	TEC	45.8441	1.52885	0.472519	3.23553	0.00121418	0.0200601
Arid3a	protein_coding	58.5178	1.53234	0.51771	2.95985	0.00307787	0.0377534
Rap1gap2	protein_coding	74.7132	1.53568	0.360177	4.26366	2.01102e-05	0.00100225
Ptgir	protein_coding	299.393	1.53694	0.26278	5.84878	4.95187e-09	8.65065e-07
Gm36931	TEC	29.6423	1.54595	0.460886	3.3543	0.000795659	0.0152217
Traj23	TR_J_gene	74.5993	1.56785	0.547815	2.862	0.0042098	0.0464842
Pde4a	protein_coding	55.5201	1.57089	0.509337	3.0842	0.00204104	0.0285608
Gm37488	TEC	121.239	1.58765	0.314967	5.04067	4.63906e-07	4.50233e-05
Lmna	protein_coding	255.816	1.58977	0.280932	5.65893	1.52321e-08	2.34067e-06
Cd86	protein_coding	1123.53	1.60126	0.166673	9.6072	7.45455e-22	1.03096e-18
Gins2	protein_coding	64.514	1.60654	0.459767	3.49426	0.000475381	0.0106327
Erf	protein_coding	48.5884	1.62105	0.530238	3.05722	0.00223402	0.0304588
Ect2	protein_coding	91.604	1.63386	0.501159	3.26017	0.00111347	0.0189724
Cnga1	protein_coding	50.0596	1.63847	0.495067	3.3096	0.000934299	0.0168539
Top2a	protein_coding	179.544	1.64496	0.560792	2.93328	0.00335405	0.0401036
Doc2g	protein_coding	24.3321	1.65305	0.544763	3.03444	0.00240979	0.0321486
Rab11fip3	protein_coding	74.78	1.65591	0.320735	5.16288	2.43185e-07	2.5952e-05
Ccdc114	protein_coding	42.8659	1.66905	0.563861	2.96004	0.00307602	0.0377534
Zfp987	protein_coding	18.7299	1.67892	0.5858	2.86603	0.00415648	0.0462464
Tbl1xr1	protein_coding	1596.92	1.72747	0.167731	10.299	7.11773e-25	1.68751e-21
Fhl3	protein_coding	151.209	1.74402	0.280397	6.21984	4.97666e-10	1.23273e-07
Atp8b4	protein_coding	36.7833	1.76815	0.5486	3.22303	0.00126842	0.0205223
Mfsd13a	protein_coding	173.883	1.79478	0.372024	4.82437	1.40444e-06	0.000114818
Tctn1	protein_coding	45.1985	1.80732	0.460407	3.92547	8.65595e-05	0.00304352
Plac8	protein_coding	94.1794	1.81302	0.528741	3.42894	0.000605939	0.0125553
Aurka	protein_coding	90.1587	1.8154	0.547881	3.3135	0.000921369	0.0167481
Hist2h3c2	protein_coding	36.8853	1.82297	0.621862	2.93147	0.00337359	0.0402213
Gm43672	lincRNA	248.042	1.82747	0.223993	8.15861	3.38895e-16	2.34346e-13
4833407H14Rik	lincRNA	343.011	1.82777	0.229356	7.96917	1.59748e-15	1.01968e-12
Aldoc	protein_coding	247.841	1.84924	0.267097	6.92349	4.40659e-12	1.66069e-09
Gm12592	processed_transcript	31.0653	1.84995	0.464128	3.98586	6.72349e-05	0.00253023
Wfikkn1	protein_coding	47.9164	1.85027	0.479871	3.85577	0.000115368	0.00380645
Gm12892	processed_pseudogene	62.9582	1.86611	0.363156	5.13861	2.7678e-07	2.85307e-05
Gm32633	lincRNA	143.469	1.92697	0.334206	5.76582	8.12623e-09	1.32219e-06
Rad54l	protein_coding	44.8016	1.94827	0.562785	3.46184	0.000536503	0.0115334
Ccdc85c	protein_coding	15.726	1.95011	0.676036	2.88462	0.00391882	0.0442176
Gm6598	antisense	28.3923	1.97831	0.483215	4.09407	4.23868e-05	0.00182241
Snx8	protein_coding	49.9585	1.97937	0.622	3.18227	0.00146128	0.0227072
Scd2	protein_coding	2778.59	2.0001	0.131747	15.1814	4.69876e-52	7.79806e-48
Ncaph	protein_coding	74.9172	2.02378	0.683455	2.9611	0.0030654	0.0376675
Zfp239	protein_coding	69.8892	2.03455	0.658876	3.08792	0.00201563	0.0283016
Cks1b	protein_coding	168.776	2.03684	0.470825	4.32612	1.5176e-05	0.000802106
Cdca8	protein_coding	119.033	2.03707	0.695514	2.92886	0.00340203	0.0404036
Cldn10	protein_coding	63.3279	2.04251	0.456159	4.47763	7.5476e-06	0.000476273
Trav9n-2	TR_V_gene	88.9981	2.04449	0.64885	3.15094	0.00162747	0.0245765
Ckb	protein_coding	943.22	2.04883	0.155507	13.1752	1.219e-39	6.74352e-36
Gm7240	transcribed_processed_pseudogene	31.0835	2.0597	0.658852	3.1262	0.00177083	0.0259159
Cenpe	protein_coding	40.5093	2.06731	0.623888	3.3136	0.000921031	0.0167481
Nme4	protein_coding	31.0439	2.08609	0.717007	2.90945	0.00362065	0.0420808
Slco4a1	protein_coding	27.6687	2.11785	0.60002	3.52963	0.000416135	0.00965899
Scd4	protein_coding	35.9925	2.13192	0.734929	2.90085	0.00372149	0.0426585
Bag2	protein_coding	36.0154	2.17356	0.582921	3.72874	0.000192437	0.00558336
Alox8	protein_coding	133.501	2.1941	0.708438	3.09709	0.00195429	0.0276499
Adam8	protein_coding	502.051	2.20067	0.744295	2.95671	0.00310937	0.0379993
Sytl3	protein_coding	33.2369	2.24756	0.771857	2.91188	0.00359261	0.0418824
Myo6	protein_coding	336.43	2.26553	0.255516	8.86646	7.55075e-19	7.37131e-16
Cdca3	protein_coding	78.5357	2.28483	0.606934	3.76454	0.000166856	0.00509972
Pdlim4	protein_coding	72.6395	2.28582	0.549826	4.15735	3.21963e-05	0.00148917
0610038B21Rik	antisense	15.1225	2.31502	0.754735	3.06733	0.00215978	0.0297458
Cenph	protein_coding	26.8609	2.31784	0.718054	3.22795	0.00124682	0.0204266
Gm48876	lincRNA	113.665	2.32499	0.305018	7.62248	2.48844e-14	1.14717e-11
Cenps	protein_coding	33.1289	2.37187	0.553899	4.28213	1.85117e-05	0.00093831
Chek1	protein_coding	34.6938	2.37564	0.701839	3.38487	0.000712113	0.0140693
Dapl1	protein_coding	168.861	2.3906	0.248161	9.63325	5.78722e-22	8.73134e-19
Gm28935	lincRNA	37.324	2.39893	0.502788	4.77125	1.83085e-06	0.000142652
Cobll1	protein_coding	118.84	2.4149	0.540031	4.47178	7.75721e-06	0.000486019
Gm49312	bidirectional_promoter_lncRNA	25.523	2.43387	0.671229	3.62599	0.000287854	0.00745243
Dtl	protein_coding	64.0706	2.4441	0.593597	4.11744	3.83108e-05	0.00169097
Mastl	protein_coding	24.8086	2.45058	0.681596	3.59536	0.000323946	0.00814576
Gm11973	antisense	16.4982	2.48115	0.700333	3.54282	0.000395875	0.0094101
Exo1	protein_coding	35.7456	2.51531	0.741473	3.39232	0.00069304	0.0138076
Fut7	protein_coding	150.323	2.51793	0.499219	5.04374	4.5651e-07	4.49543e-05
Siah3	protein_coding	39.2203	2.52433	0.674553	3.74222	0.0001824	0.00537675
Asns	protein_coding	37.0976	2.52562	0.815877	3.09559	0.00196421	0.0277666
Ccdc73	protein_coding	14.3447	2.60943	0.874515	2.98386	0.00284639	0.0361509
Dnph1	protein_coding	62.5033	2.61039	0.53705	4.86062	1.17019e-06	0.000100105
Gm29336	lincRNA	11.6068	2.63445	0.860871	3.06021	0.00221182	0.0303116
Plk1	protein_coding	64.577	2.64057	0.802281	3.29133	0.000997141	0.0175269
Acoxl	protein_coding	41.7185	2.6528	0.749405	3.53987	0.00040032	0.00945052
Il1rl1	protein_coding	448.773	2.71865	0.393022	6.91731	4.60301e-12	1.66069e-09
Mmp9	protein_coding	657.589	2.85516	0.347645	8.21286	2.15981e-16	1.70687e-13
Ramp3	protein_coding	70.9381	3.02405	0.382235	7.91149	2.54321e-15	1.56323e-12
Gm44651	processed_pseudogene	10.8986	3.18301	1.00529	3.16625	0.00154416	0.0235975
Nexn	protein_coding	8.91891	3.18896	1.11553	2.8587	0.0042538	0.0468454
Slc6a13	protein_coding	7.81796	3.21605	1.08054	2.97634	0.0029171	0.0364353
Nuf2	protein_coding	28.9785	3.24897	1.14679	2.83311	0.00460975	0.0493513
Gm14005	lincRNA	65.0522	3.25319	0.871383	3.73337	0.000188937	0.00553016
Cdk1	protein_coding	77.657	3.26719	0.750096	4.3557	1.32645e-05	0.000731355
Lrrc75b	protein_coding	7.45336	3.30295	1.12397	2.93864	0.00329656	0.0396115
Gm43560	sense_intronic	8.02935	3.38287	1.19122	2.83982	0.00451384	0.0489058
Gas2l3	protein_coding	18.6154	3.39958	0.986195	3.44716	0.000566506	0.0119767
Nek2	protein_coding	25.4673	3.41598	1.17628	2.90405	0.00368373	0.0424861
Amy1	protein_coding	16.3546	3.48506	1.23131	2.83036	0.00464957	0.0494649
Cdkn3	protein_coding	24.3482	3.51738	1.15095	3.05608	0.00224249	0.0305052
Aurkb	protein_coding	51.0425	3.52972	0.847478	4.16497	3.1139e-05	0.00145573
Rasl11a	protein_coding	44.3926	3.56643	0.976903	3.65075	0.000261475	0.00692095
Tmem273	protein_coding	139.96	3.8021	0.386817	9.8292	8.42817e-23	1.39874e-19
Ccna2	protein_coding	79.7513	3.95898	1.07648	3.67771	0.00023534	0.00642384
Selenom	protein_coding	45.2353	3.98099	1.35994	2.92732	0.003419	0.0404225
Depdc1a	protein_coding	14.5615	4.00153	1.39244	2.87375	0.00405631	0.0453692
1810010D01Rik	protein_coding	6.09228	4.19577	1.43346	2.92703	0.00342213	0.0404225
Tuba8	protein_coding	34.3639	4.20022	0.892173	4.70785	2.50342e-06	0.00019146
Ccnb2	protein_coding	134.337	4.34448	1.3854	3.13591	0.00171323	0.025409
1700001O22Rik	protein_coding	33.2034	4.37613	1.32327	3.30705	0.000942833	0.0168977
Cacnb4	protein_coding	10.985	4.68821	1.49438	3.13724	0.00170547	0.0253166
Gm38326	lincRNA	7.31547	4.77305	1.48013	3.22476	0.0012608	0.0204978
Neil3	protein_coding	13.4738	4.87016	1.69988	2.86499	0.0041702	0.0462464
2210011C24Rik	protein_coding	10.984	5.00496	1.54592	3.23754	0.00120565	0.019969
Gm35584	lincRNA	7.66285	5.03253	1.41861	3.5475	0.000388906	0.00932205
Pbk	protein_coding	23.2501	5.14352	1.51948	3.38505	0.000711661	0.0140693
Gm47782	lincRNA	8.39247	5.32107	1.58656	3.35384	0.000796976	0.0152217
Ltf	protein_coding	16.0245	5.36923	1.82124	2.94812	0.00319715	0.0387828
Gm15428	processed_pseudogene	20.3078	5.49742	1.44545	3.80327	0.000142801	0.00452277
Gatm	protein_coding	8.07655	5.56567	1.80029	3.09154	0.00199122	0.0281006
Cyb561	protein_coding	21.8189	5.74261	1.62672	3.53018	0.000415285	0.00965275
Pltp	protein_coding	7.67948	6.02122	1.90012	3.16885	0.00153041	0.0234649
1700012B07Rik	protein_coding	7.72681	6.02931	2.09153	2.88272	0.00394252	0.0443895
Parpbp	protein_coding	15.8159	6.3129	1.55839	4.05091	5.10193e-05	0.00207528
Bpifa2	protein_coding	62.3143	6.33039	1.01364	6.24521	4.23236e-10	1.08062e-07
Cyp26b1	protein_coding	41.192	6.53505	1.13228	5.77158	7.85317e-09	1.29041e-06
Ispd	protein_coding	20.2417	6.53937	1.46926	4.45078	8.55599e-06	0.000522423
Smr3a	protein_coding	6.84344	6.68903	2.01074	3.32666	0.000878948	0.0162439
Xist	lincRNA	719.042	8.39918	0.92935	9.0377	1.60009e-19	1.6597e-16
Vax2	protein_coding	14.8058	19.3411	3.12492	6.18931	6.04299e-10	1.47484e-07

## Sheet: Supplementary file 1b
Supplementary file 1b. DEG between NCOR1-cKO and WT effector Treg cells
gene_name	gene_biotype	baseMean	log2FoldChange	lfcSE	stat	pvalue	padj
Mpo	protein_coding	26.3871	-22.0033	3.12824	-7.03377	2.0103e-12	7.00455e-10
Mpeg1	protein_coding	30.1155	-5.85558	1.02615	-5.70634	1.15431e-08	1.98419e-06
Wnt10a	protein_coding	30.8628	-5.44533	0.889482	-6.12191	9.24595e-10	2.09121e-07
Prss12	protein_coding	38.1076	-3.37641	0.924911	-3.65052	0.000261708	0.0108139
Ccr10	protein_coding	31.6696	-2.80691	0.831366	-3.37627	0.000734758	0.0234976
Maged1	protein_coding	66.8934	-2.70902	0.633671	-4.27512	1.91034e-05	0.00136067
Gk5	protein_coding	34.6461	-2.59629	0.76607	-3.3891	0.000701226	0.0226572
Gbp2b	protein_coding	249.726	-2.58555	0.431944	-5.98585	2.15262e-09	4.26947e-07
Gm10499	transcribed_unprocessed_pseudogene	75.6335	-2.50064	0.715552	-3.4947	0.000474599	0.0171502
Wscd2	protein_coding	49.2598	-2.34269	0.495045	-4.73227	2.22019e-06	0.00023015
Arhgap20	protein_coding	186.517	-2.1309	0.282238	-7.55002	4.35185e-14	2.33767e-11
Pla2g4f	protein_coding	91.806	-2.05437	0.455247	-4.51265	6.40239e-06	0.000561494
Gpm6b	protein_coding	251.259	-2.0351	0.422116	-4.8212	1.427e-06	0.000164257
Matn2	protein_coding	298.478	-1.96375	0.218091	-9.00427	2.17113e-19	1.86601e-16
Il1rn	protein_coding	27.9788	-1.92928	0.4976	-3.87717	0.00010568	0.00548773
Cst7	protein_coding	1302.52	-1.76815	0.245988	-7.18797	6.5762e-13	2.5691e-10
Vcam1	protein_coding	65.3478	-1.65676	0.517312	-3.20264	0.00136174	0.0362359
Gm17764	processed_pseudogene	105.049	-1.64536	0.340922	-4.82619	1.39168e-06	0.00016236
Gsta4	protein_coding	208.457	-1.63094	0.245701	-6.6379	3.18187e-11	8.91753e-09
Gm28942	lincRNA	147.119	-1.61849	0.274795	-5.8898	3.86675e-09	7.44031e-07
1810006J02Rik	lincRNA	93.3918	-1.61029	0.450977	-3.57066	0.000356081	0.0139532
Plekho1	protein_coding	35.7736	-1.58387	0.391047	-4.05033	5.11451e-05	0.00298354
Rin2	protein_coding	137.268	-1.58229	0.4706	-3.36228	0.000773019	0.0242755
Tmem121b	protein_coding	59.6031	-1.57989	0.409074	-3.86213	0.000112403	0.00570511
Ptpn5	protein_coding	264.058	-1.57086	0.314049	-5.00194	5.67558e-07	7.31696e-05
Itgae	protein_coding	1485.26	-1.50326	0.247994	-6.06167	1.34712e-09	2.84706e-07
Serpina3f	protein_coding	203.942	-1.48938	0.33189	-4.48758	7.20371e-06	0.000619135
Rgmb	protein_coding	101.185	-1.42901	0.279528	-5.11222	3.18399e-07	4.23175e-05
Jazf1	protein_coding	113.143	-1.37692	0.394785	-3.48777	0.000487071	0.0173537
Tspan5	protein_coding	173.727	-1.35112	0.365359	-3.69806	0.000217253	0.00939875
Asap2	protein_coding	57.2953	-1.31767	0.415268	-3.17306	0.00150843	0.0391245
Actg2	protein_coding	121.268	-1.29125	0.300891	-4.29143	1.77523e-05	0.00128575
Gm6831	transcribed_unprocessed_pseudogene	45.0678	-1.28618	0.37682	-3.41323	0.000641975	0.0212332
Trib3	protein_coding	99.3086	-1.21414	0.360298	-3.36983	0.000752151	0.0238025
Sccpdh	protein_coding	201.484	-1.20396	0.207475	-5.80292	6.51687e-09	1.21762e-06
Cd7	protein_coding	612.759	-1.20292	0.184877	-6.50656	7.68895e-11	1.98252e-08
Fam174b	protein_coding	141.234	-1.18963	0.24993	-4.75987	1.93714e-06	0.000206394
Gdpd5	protein_coding	367.238	-1.188	0.316098	-3.75832	0.000171061	0.00787612
Fgf13	protein_coding	279.594	-1.18448	0.272545	-4.34598	1.38654e-05	0.00104534
B3gnt5	protein_coding	188.472	-1.18101	0.373552	-3.16157	0.0015692	0.0400351
Mgmt	protein_coding	117.66	-1.16646	0.217175	-5.37106	7.82768e-08	1.17342e-05
Colq	protein_coding	418.78	-1.1621	0.274154	-4.23887	2.24651e-05	0.00154877
Laptm4b	protein_coding	257.391	-1.12445	0.218806	-5.13902	2.76174e-07	3.74782e-05
Sh3bgrl2	protein_coding	424.572	-1.1108	0.23399	-4.74722	2.06231e-06	0.000216157
Capg	protein_coding	5963.73	-1.08874	0.165156	-6.59223	4.33278e-11	1.18847e-08
Iigp1	protein_coding	1359.65	-1.07939	0.156639	-6.89098	5.54112e-12	1.71992e-09
Fam49a	protein_coding	692.511	-1.05342	0.12826	-8.21314	2.15484e-16	1.38901e-13
Pstpip2	protein_coding	77.33	-1.04822	0.301962	-3.47138	0.000517794	0.0182726
Mctp1	protein_coding	121.003	-1.02838	0.329542	-3.12064	0.00180457	0.0435664
Irf8	protein_coding	697.409	-1.01545	0.180002	-5.64135	1.68723e-08	2.8249e-06
Gpr83	protein_coding	3106.53	-0.996165	0.233604	-4.26434	2.00496e-05	0.00140657
Arhgap5	protein_coding	312.501	-0.995732	0.292877	-3.39983	0.000674267	0.0219511
Serpinc1	protein_coding	93.6471	-0.987327	0.27968	-3.5302	0.00041524	0.0156528
Trav13n-1	TR_V_gene	74.6096	-0.984773	0.277567	-3.54788	0.000388346	0.0148123
Ddx3y	protein_coding	1560.87	-0.972408	0.245466	-3.96148	7.44872e-05	0.0041038
Uty	protein_coding	422.385	-0.970653	0.310352	-3.12759	0.00176248	0.0433623
Kdm5d	protein_coding	461.942	-0.957344	0.198772	-4.81628	1.46256e-06	0.000166861
Acsl1	protein_coding	250.565	-0.944039	0.187481	-5.03538	4.76901e-07	6.21031e-05
Serpini1	protein_coding	269.916	-0.930507	0.223086	-4.17107	3.03173e-05	0.00192537
Dtx1	protein_coding	4250.24	-0.923418	0.127177	-7.26089	3.84547e-13	1.65253e-10
Cdyl2	protein_coding	341.37	-0.901362	0.224891	-4.008	6.12343e-05	0.00350859
Rrm2b	protein_coding	338.715	-0.898991	0.246929	-3.64069	0.000271907	0.0111283
Pard6g	protein_coding	362.134	-0.891782	0.178497	-4.99607	5.85103e-07	7.46846e-05
Rflnb	protein_coding	650.378	-0.890811	0.19887	-4.47937	7.48639e-06	0.000639169
Cnn3	protein_coding	405.962	-0.889138	0.226968	-3.91747	8.94849e-05	0.00482694
Nedd4l	protein_coding	188.368	-0.88863	0.249388	-3.56324	0.000366304	0.014267
Slc25a24	protein_coding	429.465	-0.880859	0.236344	-3.72702	0.00019376	0.00861363
L3mbtl3	protein_coding	346.168	-0.869978	0.224857	-3.86902	0.000109272	0.00563492
Irf6	protein_coding	359.915	-0.857806	0.227322	-3.77353	0.000160954	0.0075182
Supt7l	protein_coding	470.373	-0.838615	0.191476	-4.37974	1.18823e-05	0.000917284
Camsap1	protein_coding	144.221	-0.836306	0.258565	-3.23442	0.00121892	0.0335286
Fam129a	protein_coding	1824.73	-0.821497	0.141818	-5.79261	6.93025e-09	1.27635e-06
Hmgn5	protein_coding	289.708	-0.819783	0.196035	-4.18183	2.89175e-05	0.00186006
Cd96	protein_coding	5249.01	-0.818047	0.135361	-6.04344	1.50867e-09	3.13706e-07
Ces2c	protein_coding	264.273	-0.815816	0.233374	-3.49574	0.000472743	0.0171502
Atp6v0d2	protein_coding	231.956	-0.813474	0.251359	-3.23631	0.00121086	0.0335286
Usp6nl	protein_coding	270.951	-0.812033	0.246514	-3.29407	0.000987478	0.0288582
Fry	protein_coding	172.698	-0.811388	0.25672	-3.1606	0.00157445	0.0400351
Itprid2	protein_coding	133.883	-0.79989	0.258204	-3.0979	0.00194899	0.0456015
Endod1	protein_coding	874.162	-0.795943	0.230973	-3.44604	0.00056886	0.0197144
Sh3bgrl	protein_coding	2244.77	-0.783474	0.166933	-4.69335	2.68772e-06	0.000268038
Tbc1d4	protein_coding	2293.46	-0.782524	0.13364	-5.85546	4.75687e-09	9.01847e-07
AW112010	lincRNA	8734.82	-0.775413	0.211908	-3.65919	0.000253016	0.0105222
Ctse	protein_coding	497.697	-0.76311	0.197584	-3.8622	0.00011237	0.00570511
Ephb6	protein_coding	1133.71	-0.761846	0.153359	-4.96774	6.77371e-07	8.47832e-05
Hspa4l	protein_coding	357.805	-0.755339	0.23695	-3.18775	0.00143382	0.0375709
Litaf	protein_coding	378.534	-0.753055	0.169424	-4.44481	8.7971e-06	0.000717799
Ppp1r21	protein_coding	330.82	-0.7515	0.200786	-3.74279	0.000181988	0.00829042
Cdc25b	protein_coding	1338.63	-0.750218	0.236587	-3.171	0.00151915	0.0391941
Fbxo32	protein_coding	588.688	-0.740106	0.175086	-4.2271	2.36726e-05	0.00161475
Tnfrsf9	protein_coding	4705.48	-0.738872	0.163963	-4.50634	6.59544e-06	0.000574516
Slc14a1	protein_coding	1502.22	-0.735942	0.164901	-4.46294	8.08429e-06	0.000672404
Clip1	protein_coding	1168.29	-0.735861	0.159923	-4.60133	4.19793e-06	0.00038935
Armcx2	protein_coding	394.76	-0.726823	0.209109	-3.47581	0.000509308	0.0180385
Atg14	protein_coding	354.077	-0.721255	0.235537	-3.06218	0.00219733	0.0495244
Arhgap31	protein_coding	879.68	-0.710994	0.215876	-3.29352	0.000989398	0.0288582
Dcun1d4	protein_coding	450.09	-0.702313	0.17583	-3.99429	6.48895e-05	0.00368527
Selenop	protein_coding	2388.35	-0.686066	0.0946494	-7.2485	4.21424e-13	1.70768e-10
Nt5e	protein_coding	2204.39	-0.682662	0.176601	-3.86555	0.000110837	0.00567029
Wdr47	protein_coding	295.053	-0.677866	0.201712	-3.36056	0.000777837	0.0242755
Gbp3	protein_coding	1312.99	-0.670048	0.115764	-5.78806	7.12052e-09	1.29293e-06
Ncor1	protein_coding	1545.05	-0.669547	0.120645	-5.54973	2.86111e-08	4.55375e-06
Id3	protein_coding	3951.24	-0.668271	0.14999	-4.45543	8.37242e-06	0.000691906
Flna	protein_coding	6709.23	-0.668078	0.0958243	-6.9719	3.12685e-12	1.00778e-09
Tiam1	protein_coding	438.39	-0.667874	0.165457	-4.03653	5.42465e-05	0.00313608
Igf1r	protein_coding	507.637	-0.666704	0.178493	-3.73519	0.000187575	0.0083966
Ift140	protein_coding	492.588	-0.66523	0.133862	-4.96954	6.71116e-07	8.47832e-05
Slc41a1	protein_coding	848.111	-0.664269	0.155152	-4.28142	1.85704e-05	0.00133005
Nrde2	protein_coding	529.43	-0.662766	0.173458	-3.8209	0.000132966	0.00649319
Cdc7	protein_coding	332.95	-0.656546	0.213723	-3.07195	0.00212664	0.048354
Vwa5a	protein_coding	614.151	-0.635116	0.169889	-3.73841	0.000185188	0.00837702
Gbp2	protein_coding	1933.24	-0.63332	0.15285	-4.1434	3.42193e-05	0.0021116
Pip4k2a	protein_coding	489.248	-0.632976	0.197412	-3.20637	0.00134422	0.0358791
Crbn	protein_coding	1622.66	-0.632154	0.145196	-4.35379	1.33801e-05	0.00101468
Exoc4	protein_coding	736.949	-0.630736	0.199845	-3.15612	0.00159883	0.0404158
Ldhb	protein_coding	1171.83	-0.630006	0.1707	-3.69071	0.000223628	0.00954527
Ssbp2	protein_coding	1218.56	-0.627311	0.147412	-4.2555	2.08579e-05	0.00145352
Trim59	protein_coding	3089.75	-0.626311	0.164498	-3.8074	0.000140433	0.00678077
Lipa	protein_coding	2541.08	-0.624849	0.119056	-5.24836	1.53458e-07	2.2229e-05
Odf2	protein_coding	910.371	-0.622397	0.144861	-4.2965	1.73515e-05	0.00126382
Eif4enif1	protein_coding	603.142	-0.616744	0.138908	-4.43996	8.99753e-06	0.000724976
Ccdc125	protein_coding	352.064	-0.613568	0.15953	-3.8461	0.000120011	0.00595068
L1cam	protein_coding	618.216	-0.609554	0.183246	-3.32643	0.000879677	0.0264354
Ppm1d	protein_coding	649.459	-0.600675	0.163173	-3.68122	0.000232124	0.00981163
Cd82	protein_coding	8373.06	-0.595326	0.15283	-3.89535	9.80568e-05	0.00515979
Adamts6	protein_coding	553.528	-0.591744	0.186622	-3.17082	0.0015201	0.0391941
Rad17	protein_coding	559.899	-0.589893	0.161954	-3.64235	0.000270159	0.011092
Rgcc	protein_coding	216.097	-0.586388	0.189943	-3.08717	0.00202072	0.046603
Ptpre	protein_coding	700.124	-0.58484	0.134127	-4.36035	1.29852e-05	0.000990565
Stat1	protein_coding	4652.25	-0.584745	0.135179	-4.32571	1.52042e-05	0.00112651
Cldnd1	protein_coding	1263.4	-0.583304	0.179713	-3.24575	0.00117143	0.0326886
Lta	protein_coding	1965.81	-0.583267	0.129002	-4.52139	6.14353e-06	0.000549997
Gzf1	protein_coding	355.435	-0.574482	0.172054	-3.33897	0.000840893	0.0256284
Spata13	protein_coding	3302.81	-0.572096	0.110753	-5.1655	2.39797e-07	3.36029e-05
Orai2	protein_coding	1570.49	-0.56667	0.162315	-3.49117	0.000480905	0.0172218
Slamf6	protein_coding	4816.43	-0.563411	0.126719	-4.44616	8.74192e-06	0.000717799
Nfatc1	protein_coding	4213.42	-0.5575	0.118978	-4.68576	2.78922e-06	0.000272413
Card6	protein_coding	1501.59	-0.557036	0.143516	-3.88135	0.000103876	0.0054438
Eps15	protein_coding	1853.11	-0.556408	0.167192	-3.32797	0.000874826	0.0263511
Pdk1	protein_coding	2502.48	-0.552417	0.128286	-4.30613	1.66137e-05	0.00122391
Tgfbr1	protein_coding	1493.03	-0.550689	0.161617	-3.40737	0.00065591	0.0215165
Pdlim5	protein_coding	634.644	-0.549938	0.160413	-3.42826	0.000607461	0.0204475
Anp32e	protein_coding	1965.26	-0.549164	0.143718	-3.82111	0.000132851	0.00649319
Hif1a	protein_coding	6006.52	-0.539437	0.13668	-3.94672	7.92306e-05	0.00430988
Susd6	protein_coding	2002.1	-0.538048	0.114669	-4.6922	2.70283e-06	0.000268038
Pcmtd2	protein_coding	1410.22	-0.537058	0.149993	-3.58054	0.000342884	0.0135182
Slc2a3	protein_coding	1753.4	-0.534086	0.110159	-4.84831	1.24519e-06	0.000148639
Cbfa2t2	protein_coding	485.81	-0.533742	0.169446	-3.14992	0.00163315	0.0412026
Lclat1	protein_coding	1269.35	-0.532493	0.125433	-4.24523	2.18369e-05	0.00151356
Cd1d2	polymorphic_pseudogene	486.114	-0.530841	0.170434	-3.11465	0.00184162	0.0440732
Hsd11b1	protein_coding	1587.96	-0.529105	0.137875	-3.83756	0.000124261	0.00611438
Armc7	protein_coding	1443.77	-0.528862	0.140656	-3.75998	0.00016993	0.00785209
Zc3h12d	protein_coding	833.162	-0.527376	0.130642	-4.03681	5.4184e-05	0.00313608
Prnp	protein_coding	527.903	-0.526657	0.143481	-3.67058	0.000242004	0.0101296
Pitpnm2	protein_coding	694.989	-0.526184	0.150658	-3.49257	0.000478401	0.0171798
Rfwd3	protein_coding	724.891	-0.525927	0.154731	-3.39898	0.000676386	0.0219647
Madd	protein_coding	1862.11	-0.525502	0.138937	-3.78231	0.000155379	0.00731075
Gprasp1	protein_coding	583.211	-0.523156	0.15267	-3.42672	0.000610913	0.0205101
Camk2d	protein_coding	2135.57	-0.52134	0.0953279	-5.46891	4.5281e-08	7.03328e-06
Capn2	protein_coding	2090.82	-0.517347	0.11652	-4.43997	8.99727e-06	0.000724976
Dok1	protein_coding	828.495	-0.516159	0.156864	-3.29049	0.00100012	0.0289092
Cyfip1	protein_coding	1123.15	-0.513417	0.158841	-3.23228	0.00122808	0.0336144
Dgka	protein_coding	18022.5	-0.512164	0.165256	-3.09921	0.00194035	0.0455948
Micu2	protein_coding	1599.5	-0.510075	0.145964	-3.49452	0.000474916	0.0171502
Mboat7	protein_coding	1388.9	-0.508626	0.124155	-4.09669	4.19097e-05	0.00250139
Triobp	protein_coding	1174.38	-0.507096	0.126813	-3.99877	6.36736e-05	0.00363221
Cux1	protein_coding	1112.04	-0.504928	0.123055	-4.10328	4.07341e-05	0.00244253
Rab3ip	protein_coding	1178.43	-0.504408	0.143429	-3.51679	0.000436803	0.0162753
Lrrc32	protein_coding	6013.57	-0.502537	0.143252	-3.50807	0.000451372	0.0166736
Ift80	protein_coding	4179.57	-0.502236	0.144338	-3.47957	0.000502214	0.0178362
Ikzf1	protein_coding	4757.14	-0.498569	0.105866	-4.70942	2.4842e-06	0.000250348
Nrp1	protein_coding	3704.05	-0.496119	0.11815	-4.19906	2.68029e-05	0.00177201
Lcp2	protein_coding	8991.26	-0.495488	0.157749	-3.14098	0.00168382	0.042233
Trim26	protein_coding	1803.98	-0.493938	0.134815	-3.66383	0.000248467	0.0103665
Tmem131l	protein_coding	1345.8	-0.489955	0.126994	-3.85811	0.000114268	0.00573627
Tagap	protein_coding	2062.66	-0.489233	0.116489	-4.19982	2.67125e-05	0.00177201
Ipcef1	protein_coding	1829.58	-0.489134	0.151635	-3.22573	0.00125653	0.0341657
Cand1	protein_coding	1969.54	-0.488835	0.109308	-4.4721	7.74546e-06	0.000652643
Cd84	protein_coding	2400.07	-0.487372	0.13173	-3.69978	0.000215789	0.00939875
Ephx1	protein_coding	2948.16	-0.484089	0.107858	-4.48821	7.18239e-06	0.000619135
Pigk	protein_coding	983.567	-0.482933	0.155861	-3.09848	0.00194517	0.0455948
Oxct1	protein_coding	1149.3	-0.482594	0.140226	-3.44156	0.000578378	0.0199322
Ccng1	protein_coding	4005.69	-0.480711	0.135572	-3.54579	0.000391439	0.0148537
Nedd9	protein_coding	2541.86	-0.480332	0.147177	-3.26363	0.00109995	0.0309618
Dennd2d	protein_coding	2179.55	-0.479952	0.116809	-4.10888	3.97585e-05	0.00239517
Cltc	protein_coding	3161.71	-0.479773	0.141943	-3.38003	0.000724767	0.023243
Tbc1d14	protein_coding	1749.87	-0.478634	0.136218	-3.51374	0.000441844	0.0164157
Ttc3	protein_coding	1050.34	-0.478021	0.142793	-3.34764	0.000815018	0.0251369
Il6st	protein_coding	3129.01	-0.477076	0.122993	-3.87888	0.000104938	0.00547717
Mbnl2	protein_coding	1103.69	-0.476907	0.150016	-3.17903	0.00147766	0.0384074
Il16	protein_coding	6765.52	-0.476769	0.148882	-3.20233	0.0013632	0.0362359
Gbp7	protein_coding	3189	-0.474938	0.129999	-3.6534	0.00025879	0.0107277
Pitpnm1	protein_coding	4434.39	-0.472459	0.118853	-3.97516	7.03316e-05	0.00392517
Cnst	protein_coding	888.718	-0.47002	0.139266	-3.37499	0.000738174	0.0234976
Iqgap1	protein_coding	3599.23	-0.46946	0.0963786	-4.871	1.11037e-06	0.000135046
Pbxip1	protein_coding	3125.46	-0.46864	0.150471	-3.11449	0.00184265	0.0440732
Msh2	protein_coding	1205.6	-0.467308	0.122794	-3.80563	0.000141442	0.00680397
Btg2	protein_coding	5309.18	-0.464072	0.150008	-3.09366	0.00197706	0.0458422
Fam102a	protein_coding	2731.65	-0.45956	0.130115	-3.53194	0.000412519	0.0155959
Mms19	protein_coding	1411.61	-0.458237	0.145145	-3.15709	0.00159353	0.0403612
Tmem229b	protein_coding	1314.85	-0.45785	0.133824	-3.42129	0.000623241	0.0208156
Cntrl	protein_coding	1589.84	-0.456719	0.123951	-3.68467	0.000228995	0.00971119
Atp2a3	protein_coding	4955.58	-0.456613	0.0966352	-4.72512	2.2998e-06	0.00023531
Fam3c	protein_coding	2193.43	-0.456248	0.108124	-4.21968	2.44646e-05	0.00165999
Hsdl2	protein_coding	768.539	-0.455306	0.116453	-3.9098	9.23737e-05	0.00494142
Ypel5	protein_coding	2024.62	-0.454626	0.135841	-3.34675	0.000817662	0.0251582
Rfk	protein_coding	1835.23	-0.45353	0.147458	-3.07566	0.00210039	0.0481235
Tnfaip8	protein_coding	1883.57	-0.453057	0.122453	-3.69985	0.000215727	0.00939875
Anxa5	protein_coding	1935.67	-0.452024	0.13809	-3.27341	0.00106258	0.0300413
Ivns1abp	protein_coding	3355.8	-0.449559	0.0976396	-4.60427	4.13912e-06	0.000386677
Hip1r	protein_coding	1033.02	-0.446406	0.131843	-3.38588	0.000709509	0.0228675
Arhgef6	protein_coding	2155.88	-0.443711	0.139573	-3.17906	0.00147754	0.0384074
Dock2	protein_coding	7111.41	-0.440339	0.119316	-3.69053	0.000223789	0.00954527
Arid5a	protein_coding	2468.13	-0.437639	0.132658	-3.29901	0.000970263	0.0284935
Tgoln1	protein_coding	2453.8	-0.436632	0.121759	-3.58602	0.000335759	0.0133188
Traf1	protein_coding	4444.88	-0.434699	0.116888	-3.71893	0.000200072	0.00883333
Tspyl1	protein_coding	1349.9	-0.434457	0.109401	-3.97124	7.15001e-05	0.00397319
Acot9	protein_coding	1500.56	-0.434399	0.121556	-3.57364	0.000352049	0.0138373
Tollip	protein_coding	1096.07	-0.43267	0.132303	-3.2703	0.00107433	0.0303069
Rnf19a	protein_coding	1095.13	-0.432654	0.126103	-3.43096	0.00060145	0.0203875
Ssh2	protein_coding	2967.03	-0.429939	0.114681	-3.74901	0.000177534	0.0081451
Zfp110	protein_coding	1408.88	-0.42812	0.126519	-3.38384	0.000714795	0.0229804
Fli1	protein_coding	2816.55	-0.426605	0.118311	-3.6058	0.000311193	0.0124593
Hsd17b4	protein_coding	1253.99	-0.426028	0.118417	-3.59769	0.000321054	0.0128143
Stag1	protein_coding	1341.22	-0.424517	0.134364	-3.15947	0.00158057	0.0401116
Trip12	protein_coding	2006.25	-0.422318	0.114362	-3.69282	0.000221778	0.00953055
Hp1bp3	protein_coding	4103.1	-0.419434	0.10872	-3.85793	0.000114352	0.00573627
Rab3gap1	protein_coding	1345.6	-0.417988	0.130762	-3.19655	0.00139082	0.0368124
Mapk9	protein_coding	850.469	-0.416392	0.123885	-3.36111	0.000776292	0.0242755
Zdhhc17	protein_coding	497.502	-0.415986	0.135388	-3.07254	0.00212244	0.0483436
Atp6v1d	protein_coding	2288.51	-0.41221	0.11626	-3.54559	0.000391735	0.0148537
Rabgap1l	protein_coding	2357.77	-0.411127	0.12269	-3.35095	0.000805356	0.0248984
Mbp	protein_coding	2404.53	-0.410919	0.13319	-3.08521	0.00203411	0.0468282
Scamp2	protein_coding	1924.88	-0.41054	0.124892	-3.28715	0.00101206	0.0291237
Cog5	protein_coding	770.362	-0.408066	0.110339	-3.69829	0.000217053	0.00939875
Trappc12	protein_coding	1501.54	-0.406842	0.128645	-3.16252	0.0015641	0.0400351
Tax1bp1	protein_coding	4701.45	-0.406042	0.132207	-3.07125	0.00213164	0.0483822
Dnajc1	protein_coding	975.921	-0.404606	0.121227	-3.33759	0.000845083	0.0256953
Glud1	protein_coding	3295.07	-0.403117	0.121611	-3.3148	0.000917095	0.0272424
Plekhg2	protein_coding	2650	-0.399874	0.129107	-3.09723	0.00195339	0.0456215
Zfand5	protein_coding	1426.07	-0.399263	0.129581	-3.08119	0.00206173	0.0473793
Tbc1d15	protein_coding	1994.75	-0.398837	0.118408	-3.36834	0.000756224	0.0238368
Tnfrsf1b	protein_coding	5898.51	-0.394373	0.112319	-3.51118	0.000446127	0.0165272
Exoc2	protein_coding	1803.56	-0.391999	0.11966	-3.27593	0.00105314	0.0298695
Stat3	protein_coding	5153.84	-0.391988	0.121244	-3.23304	0.0012248	0.0335961
Slc9a9	protein_coding	902.257	-0.384725	0.113467	-3.39063	0.000697315	0.0225874
Polg	protein_coding	1871.73	-0.382521	0.115998	-3.29766	0.000974946	0.0285659
Stat5b	protein_coding	3492.8	-0.381582	0.105606	-3.61328	0.000302352	0.0122588
Lrp10	protein_coding	7469.55	-0.37891	0.105051	-3.60691	0.000309867	0.0124449
Hsp90b1	protein_coding	3836.75	-0.378299	0.117501	-3.21953	0.00128399	0.0347028
Epsti1	protein_coding	1977.19	-0.3757	0.114695	-3.27565	0.00105419	0.0298695
Dcaf11	protein_coding	2659.02	-0.37458	0.109639	-3.41649	0.000634347	0.0211318
Il6ra	protein_coding	4730.65	-0.366397	0.0992059	-3.69329	0.000221368	0.00953055
Vsir	protein_coding	5489	-0.365247	0.109893	-3.32367	0.000888428	0.0265745
Cd28	protein_coding	6081.57	-0.363709	0.118818	-3.06105	0.00220559	0.0496239
Fam53b	protein_coding	3627.26	-0.363516	0.118394	-3.07039	0.0021378	0.0483899
Zfp869	protein_coding	941.534	-0.362636	0.110676	-3.27655	0.00105083	0.0298695
Srpk2	protein_coding	1358.84	-0.362019	0.112779	-3.20999	0.00132742	0.0355043
Kctd10	protein_coding	1904.05	-0.361246	0.111695	-3.23422	0.00121974	0.0335286
Adss	protein_coding	2117.74	-0.360924	0.108222	-3.33502	0.000852922	0.0258119
Slc28a2	protein_coding	2698.22	-0.356394	0.11013	-3.23612	0.00121167	0.0335286
Hbp1	protein_coding	3051.28	-0.352797	0.113121	-3.11875	0.00181619	0.0437146
Adcy7	protein_coding	2689.45	-0.349217	0.104486	-3.34223	0.00083108	0.0254187
Abcf3	protein_coding	1428.45	-0.342664	0.10731	-3.19322	0.00140698	0.0370936
Wipf1	protein_coding	2241.13	-0.341838	0.111746	-3.05906	0.00222031	0.049868
Brd8	protein_coding	1998.98	-0.34157	0.109855	-3.1093	0.00187534	0.0447721
Wwp2	protein_coding	2237.56	-0.335189	0.0883967	-3.79187	0.000149518	0.00706075
Lrch1	protein_coding	1149.06	-0.33436	0.098331	-3.40035	0.000672987	0.0219511
Smc1a	protein_coding	2067.68	-0.332764	0.106209	-3.13311	0.00172967	0.042965
Myh9	protein_coding	4683.05	-0.307663	0.0985054	-3.12331	0.00178827	0.0434352
Arhgap27	protein_coding	2674.02	-0.304738	0.0927555	-3.28539	0.00101843	0.029208
Ptpn7	protein_coding	6284.67	-0.282809	0.0880907	-3.21042	0.00132539	0.0355043
Prkd2	protein_coding	4354.74	-0.275911	0.0890408	-3.0987	0.00194372	0.0455948
Rin3	protein_coding	2996.86	-0.252521	0.0804522	-3.13877	0.0016966	0.0423533
Psd4	protein_coding	4093.47	-0.25028	0.0783104	-3.196	0.00139346	0.0368124
Ncoa3	protein_coding	4260.17	0.270222	0.0729892	3.70222	0.000213719	0.00939875
Ndufb3	protein_coding	970.498	0.308259	0.0986278	3.12548	0.00177517	0.0434352
Mapkapk3	protein_coding	2901.28	0.312776	0.100296	3.11854	0.00181749	0.0437146
Pa2g4	protein_coding	2685.27	0.331463	0.102483	3.23434	0.00121924	0.0335286
Gm16286	protein_coding	2461.23	0.350094	0.101025	3.46541	0.000529433	0.018598
Bccip	protein_coding	1119.08	0.357849	0.116395	3.07443	0.00210904	0.0481235
Gemin7	protein_coding	1254.66	0.359488	0.110174	3.26291	0.00110275	0.030973
Rad23a	protein_coding	1506.56	0.370442	0.107703	3.43946	0.000582876	0.0199322
Snrnp27	protein_coding	767.371	0.373098	0.11925	3.1287	0.00175582	0.0432811
Mrpl39	protein_coding	703.318	0.373305	0.120167	3.10655	0.00189282	0.0449398
Mrpl19	protein_coding	552.071	0.37933	0.118847	3.19175	0.00141413	0.037206
Erg28	protein_coding	1054.6	0.379578	0.113793	3.33569	0.000850892	0.025811
Cox7a2	protein_coding	1418.57	0.379642	0.117329	3.23569	0.00121348	0.0335286
Ep400	protein_coding	2050.05	0.382407	0.124375	3.07464	0.00210759	0.0481235
Med15	protein_coding	2355.76	0.388144	0.103852	3.73746	0.000185888	0.00837924
Sem1	protein_coding	1747.01	0.388245	0.099517	3.90129	9.56812e-05	0.00507622
Nutf2	protein_coding	807.045	0.388797	0.125258	3.10397	0.00190942	0.0450848
Pop5	protein_coding	949.035	0.389738	0.113069	3.4469	0.000567057	0.0197144
Fam162a	protein_coding	597.962	0.394185	0.122167	3.2266	0.00125272	0.0341439
Guk1	protein_coding	979.138	0.396932	0.113633	3.4931	0.000477453	0.0171798
Tomm20	protein_coding	1601.84	0.401268	0.126956	3.16069	0.00157396	0.0400351
Ppdpf	protein_coding	1671.61	0.411041	0.133883	3.07015	0.00213948	0.0483899
Dnmt3a	protein_coding	1044.83	0.417209	0.126753	3.29153	0.000996452	0.028868
Macf1	protein_coding	3672.07	0.420013	0.077456	5.4226	5.87371e-08	8.90869e-06
Ifi206	protein_coding	4765.14	0.421836	0.122611	3.44043	0.000580784	0.0199322
Uqcrq	protein_coding	1260.68	0.422479	0.134704	3.13635	0.00171063	0.0425742
Atad3a	protein_coding	1103.27	0.422881	0.127881	3.30683	0.000943584	0.0278652
Tomm7	protein_coding	1031.33	0.42298	0.138017	3.06469	0.00217896	0.0491963
Nfkbiz	protein_coding	2358.36	0.426856	0.135554	3.14897	0.0016385	0.0412568
Prrc2a	protein_coding	1608.4	0.436475	0.114891	3.79905	0.000145254	0.00691002
Mrpl30	protein_coding	1171.38	0.442925	0.11368	3.89625	9.7695e-05	0.00515979
Gpr183	protein_coding	3506.46	0.454136	0.117898	3.85196	0.000117178	0.00583264
Hmg20b	protein_coding	1147.52	0.457038	0.147865	3.09091	0.00199542	0.046102
Mrps24	protein_coding	1091.93	0.458851	0.118647	3.86735	0.000110023	0.00565107
Tomm5	protein_coding	729.673	0.462123	0.122748	3.7648	0.00016668	0.00775753
Mid1ip1	protein_coding	354.685	0.462296	0.149333	3.09574	0.00196324	0.0456583
Dmac1	protein_coding	691.942	0.465427	0.143594	3.24127	0.00118998	0.0331345
Ndufb1-ps	bidirectional_promoter_lncRNA	688.221	0.466211	0.131303	3.55064	0.000384298	0.0147452
Nt5c	protein_coding	2402.01	0.469024	0.11323	4.14224	3.43934e-05	0.0021116
Elovl5	protein_coding	5222.66	0.471355	0.141965	3.32023	0.000899442	0.0268417
Stard4	protein_coding	370.421	0.477129	0.14959	3.18958	0.00142479	0.0374101
Sdhd	protein_coding	1379.97	0.481819	0.112536	4.28146	1.85671e-05	0.00133005
Atxn2l	protein_coding	3793.41	0.482546	0.128925	3.74284	0.000181952	0.00829042
Tsfm	protein_coding	424.455	0.488879	0.124721	3.91977	8.86332e-05	0.00480109
Hspe1	protein_coding	1210.86	0.48889	0.12685	3.85407	0.000116171	0.00580493
Atp5mpl	protein_coding	1123.7	0.489292	0.133079	3.6767	0.00023627	0.00995422
Rpf2	protein_coding	584.545	0.491529	0.134713	3.64871	0.000263561	0.0108557
Cd200r1	protein_coding	953.072	0.492192	0.148883	3.3059	0.000946706	0.0278652
Bcat2	protein_coding	1036.21	0.492778	0.140509	3.50709	0.000453044	0.0166875
Ndufa1	protein_coding	1141.99	0.494668	0.117694	4.20301	2.63385e-05	0.00176852
Gas5	processed_transcript	3218.55	0.501558	0.125976	3.98139	6.85132e-05	0.00384031
Eif4ebp2	protein_coding	1074.06	0.501876	0.138899	3.61325	0.00030238	0.0122588
B630019A10Rik	antisense	466.886	0.504577	0.144333	3.49592	0.000472433	0.0171502
Slc25a22	protein_coding	1191.54	0.508546	0.154877	3.28354	0.00102511	0.0293033
Lyar	protein_coding	625.984	0.510195	0.153984	3.31329	0.000922038	0.0273262
2410006H16Rik	processed_transcript	845.405	0.510428	0.109238	4.67261	2.97403e-06	0.000288279
Rpa3	protein_coding	280.327	0.511569	0.164793	3.10431	0.00190722	0.0450848
Mknk2	protein_coding	1192.4	0.513742	0.123505	4.15968	3.18689e-05	0.00201399
BC005537	protein_coding	990.881	0.517417	0.127415	4.06086	4.88914e-05	0.00287812
Ptger2	protein_coding	1343.89	0.517878	0.155431	3.33188	0.000862616	0.0260441
Usp16	protein_coding	1035.08	0.520586	0.151465	3.437	0.000588195	0.020008
Romo1	protein_coding	795.054	0.52078	0.107106	4.86227	1.16045e-06	0.000139818
Tmem181b-ps	transcribed_unprocessed_pseudogene	669.953	0.521012	0.155092	3.35937	0.000781196	0.0242755
Csrp1	protein_coding	724.224	0.522274	0.15082	3.4629	0.000534381	0.0187207
Ldb1	protein_coding	1035.91	0.523464	0.123668	4.23284	2.30763e-05	0.00158245
Bst2	protein_coding	1488.57	0.52586	0.142513	3.6899	0.000224342	0.00954527
Prmt7	protein_coding	815.431	0.526991	0.156355	3.37047	0.000750404	0.0238025
Rcbtb2	protein_coding	1448.63	0.528604	0.171011	3.09106	0.00199443	0.046102
Sesn1	protein_coding	7027.89	0.531777	0.170592	3.11725	0.00182546	0.0438246
Ubxn7	protein_coding	692.966	0.533682	0.171011	3.12074	0.00180398	0.0435664
Tesc	protein_coding	1178.45	0.538057	0.150189	3.58254	0.000340271	0.0134564
Chchd1	protein_coding	670.18	0.542142	0.134955	4.0172	5.88944e-05	0.00338958
Nsdhl	protein_coding	510.256	0.542922	0.157827	3.43998	0.000581751	0.0199322
St8sia6	protein_coding	2436.37	0.544266	0.12004	4.53402	5.78707e-06	0.000521727
Rap2b	protein_coding	519.202	0.546121	0.156081	3.49896	0.000467077	0.0171067
Sirt6	protein_coding	596.755	0.547092	0.160256	3.41385	0.000640508	0.0212332
Ndufab1	protein_coding	484.88	0.548105	0.131362	4.17247	3.01314e-05	0.00192304
Rasgrp4	protein_coding	374.267	0.548183	0.154427	3.54979	0.000385532	0.0147486
Sigmar1	protein_coding	665.714	0.549619	0.175861	3.1253	0.00177626	0.0434352
Usmg5	protein_coding	883.285	0.549632	0.135451	4.0578	4.9538e-05	0.00290293
Aacs	protein_coding	1335.61	0.555347	0.167302	3.31942	0.000902048	0.0268573
Bola2	protein_coding	542.288	0.557476	0.175721	3.1725	0.00151132	0.0391245
Tob1	protein_coding	1249.79	0.559506	0.159775	3.50183	0.000462072	0.0169716
Srm	protein_coding	1204.68	0.559697	0.136786	4.09176	4.28112e-05	0.00254342
Pet100	protein_coding	352.985	0.559896	0.17784	3.14832	0.0016421	0.0412669
Snhg6	lincRNA	300.948	0.562799	0.181773	3.09616	0.00196042	0.0456583
Ppm1j	protein_coding	846.922	0.563195	0.120714	4.66552	3.07833e-06	0.000296163
Mxd1	protein_coding	1704.2	0.569972	0.149841	3.80384	0.000142471	0.0068163
Hdac5	protein_coding	710.85	0.572667	0.17756	3.22521	0.00125882	0.0341657
Aars2	protein_coding	349.285	0.573898	0.181385	3.16397	0.00155631	0.0399681
Wapl	protein_coding	932.869	0.578684	0.16405	3.52749	0.000419516	0.0157221
Notch2	protein_coding	737.886	0.5801	0.13496	4.29832	1.72098e-05	0.00126062
Ung	protein_coding	261.653	0.58218	0.182047	3.19796	0.00138405	0.0367143
Gemin2	protein_coding	365.545	0.586574	0.171024	3.42977	0.000604096	0.0203875
Dph5	protein_coding	1007.81	0.587273	0.140282	4.18637	2.83456e-05	0.00184561
Rock2	protein_coding	281.85	0.588376	0.182885	3.21719	0.00129454	0.0349147
Ost4	protein_coding	580.312	0.588784	0.15435	3.81461	0.000136401	0.00663576
Nme1	protein_coding	1123.59	0.589885	0.123904	4.76082	1.92807e-06	0.000206394
Skil	protein_coding	2218.46	0.590345	0.15229	3.87645	0.000105992	0.00548773
Ntpcr	protein_coding	306.898	0.59667	0.192761	3.09538	0.00196559	0.0456583
Abhd2	protein_coding	878.185	0.597499	0.185124	3.22757	0.00124848	0.0341003
Gm4459	processed_pseudogene	191.24	0.602028	0.188985	3.18558	0.00144462	0.037777
Hemk1	protein_coding	386.187	0.606059	0.134285	4.51324	6.38454e-06	0.000561494
Dazap1	protein_coding	269.369	0.608697	0.165615	3.67538	0.000237496	0.0099733
Mettl1	protein_coding	216.25	0.611043	0.193269	3.16162	0.00156895	0.0400351
Tmf1	protein_coding	1153.6	0.612639	0.175659	3.48765	0.000487282	0.0173537
Elovl6	protein_coding	293.252	0.628696	0.200753	3.13169	0.00173802	0.0430744
Rln3	protein_coding	1159.9	0.629092	0.135701	4.63588	3.5543e-06	0.000336926
Ifi213	protein_coding	2630.57	0.630316	0.129109	4.88205	1.04986e-06	0.000128903
Gar1	protein_coding	291.62	0.635374	0.203437	3.12319	0.00178902	0.0434352
Mterf1a	protein_coding	318.735	0.640934	0.186157	3.44297	0.000575364	0.0198863
Cdca7	protein_coding	527.531	0.642257	0.192127	3.34288	0.00082915	0.0254187
Pfas	protein_coding	513.272	0.642878	0.168842	3.80756	0.000140342	0.00678077
Birc6	protein_coding	2361.1	0.645158	0.109197	5.9082	3.45864e-09	6.75588e-07
Nudt3	protein_coding	306.195	0.650395	0.174079	3.7362	0.000186825	0.00839215
Uros	protein_coding	588.199	0.657508	0.200149	3.28509	0.00101952	0.029208
Crebl2	protein_coding	202.2	0.664771	0.195469	3.4009	0.000671644	0.0219511
H2afy	protein_coding	681.683	0.667917	0.197898	3.37506	0.000738004	0.0234976
Snhg15	processed_transcript	234.305	0.66923	0.18092	3.69905	0.000216412	0.00939875
Malt1	protein_coding	1565.77	0.671727	0.204036	3.2922	0.000994073	0.0288639
Nop16	protein_coding	657.343	0.678484	0.131014	5.17871	2.23424e-07	3.16526e-05
Flot1	protein_coding	655.54	0.679453	0.161742	4.20085	2.65909e-05	0.00177201
Arf6	protein_coding	400.519	0.679971	0.186899	3.63817	0.000274584	0.0112023
Smox	protein_coding	464.961	0.683127	0.212653	3.2124	0.00131632	0.0353878
Rnf213	protein_coding	1346.96	0.689733	0.193495	3.5646	0.00036441	0.0142363
Sytl2	protein_coding	754.146	0.691951	0.170193	4.06567	4.78941e-05	0.00283234
Cox16	protein_coding	292.758	0.692677	0.20727	3.34191	0.000832044	0.0254187
Ifit1	protein_coding	1612.61	0.695804	0.222775	3.12336	0.00178802	0.0434352
Ptpmt1	processed_transcript	262.117	0.701121	0.176811	3.96537	7.32808e-05	0.00405466
Wdfy1	protein_coding	200.408	0.702305	0.19903	3.52864	0.000417695	0.0156995
Kdm6b	protein_coding	2045.28	0.704367	0.109227	6.44864	1.12859e-10	2.79804e-08
Pcyt2	protein_coding	2205.38	0.713616	0.134188	5.31803	1.04898e-07	1.55441e-05
Cdk9	protein_coding	279.819	0.716566	0.213309	3.35929	0.000781441	0.0242755
Jak2	protein_coding	669.993	0.722864	0.158719	4.55436	5.25456e-06	0.000477054
Wtap	protein_coding	2039.04	0.724327	0.150764	4.80438	1.5523e-06	0.00017402
Nle1	protein_coding	691.832	0.725973	0.173629	4.18118	2.90002e-05	0.00186006
Ydjc	protein_coding	180.322	0.726318	0.233693	3.10801	0.00188354	0.0448847
Lysmd2	protein_coding	1044.97	0.727077	0.111069	6.54619	5.90233e-11	1.58527e-08
Uck2	protein_coding	1343.92	0.73511	0.152049	4.8347	1.33345e-06	0.000157714
D17H6S53E	protein_coding	343.563	0.736533	0.204172	3.60742	0.000309263	0.0124449
Npm3	protein_coding	225.481	0.737852	0.215132	3.42977	0.000604093	0.0203875
Tatdn1	protein_coding	153.332	0.743923	0.199512	3.72871	0.000192464	0.00858562
Abhd11	protein_coding	630.729	0.74426	0.170023	4.37742	1.20092e-05	0.000921567
Srebf1	protein_coding	2569.17	0.747154	0.155674	4.79947	1.59083e-06	0.000176801
1110038B12Rik	processed_transcript	157.81	0.753692	0.242576	3.10704	0.00188971	0.0449398
Epn1	protein_coding	334.777	0.754728	0.147612	5.1129	3.1725e-07	4.23175e-05
Gimap7	protein_coding	4436.66	0.757694	0.148995	5.08538	3.66886e-07	4.82643e-05
Arap2	protein_coding	996.47	0.760258	0.166732	4.55974	5.12159e-06	0.00046828
Itih5	protein_coding	925.954	0.761826	0.223208	3.41308	0.000642333	0.0212332
Snord78	snoRNA	180.038	0.762182	0.18191	4.18988	2.79101e-05	0.0018358
Tmem259	protein_coding	208.896	0.762434	0.247937	3.07511	0.00210424	0.0481235
Tbl1x	protein_coding	1896.33	0.762816	0.104041	7.33185	2.26998e-13	1.00912e-10
Vmn2r97	protein_coding	574.808	0.771161	0.187144	4.12069	3.77745e-05	0.00228634
Hmgcr	protein_coding	2029.43	0.773846	0.12666	6.10963	9.98613e-10	2.18205e-07
Srebf2	protein_coding	3633.2	0.778625	0.106019	7.34423	2.06945e-13	9.52834e-11
Bach2	protein_coding	684.477	0.779774	0.188181	4.14374	3.41681e-05	0.0021116
Tmem63b	protein_coding	248.974	0.788556	0.23979	3.28853	0.00100711	0.0290461
Ifrd2	protein_coding	404.707	0.792448	0.179164	4.42303	9.73264e-06	0.000774526
Taf1d	protein_coding	516.089	0.795938	0.191969	4.14617	3.38078e-05	0.0021116
8030462N17Rik	protein_coding	433.816	0.802191	0.202656	3.95838	7.54584e-05	0.00412208
Dhrs3	protein_coding	556.424	0.805108	0.194006	4.1499	3.32614e-05	0.00209174
Ankrd55	protein_coding	195.696	0.807033	0.226747	3.55917	0.00037203	0.014403
Hnrnpul2	protein_coding	141.847	0.808554	0.232954	3.47088	0.000518752	0.0182726
Csnk1g2	protein_coding	374.915	0.811457	0.203624	3.98507	6.74597e-05	0.00379778
Arhgef10	protein_coding	375.594	0.811544	0.246467	3.29271	0.000992261	0.0288639
Sc5d	protein_coding	2000.5	0.822557	0.145106	5.66866	1.43919e-08	2.44132e-06
4833407H14Rik	lincRNA	343.011	0.824661	0.211154	3.9055	9.40305e-05	0.00500926
Ogg1	protein_coding	132.914	0.830814	0.266214	3.12085	0.00180331	0.0435664
Nrm	protein_coding	383.546	0.831578	0.197547	4.20952	2.55915e-05	0.00172736
Abcg1	protein_coding	4907.36	0.832441	0.158812	5.24169	1.59114e-07	2.27922e-05
Snhg1	processed_transcript	343.508	0.837297	0.190143	4.40351	1.06515e-05	0.000837312
Gpr34	protein_coding	962.97	0.837524	0.151656	5.5225	3.342e-08	5.25428e-06
Alg8	protein_coding	170.675	0.861497	0.188826	4.56237	5.05782e-06	0.000465753
Plcxd2	protein_coding	613.259	0.864139	0.232052	3.72391	0.000196161	0.00869042
Gngt2	protein_coding	188.078	0.870349	0.232811	3.73843	0.000185172	0.00837702
AI504432	lincRNA	322.74	0.871593	0.230699	3.77806	0.000158056	0.00740966
Rsad2	protein_coding	301.414	0.873314	0.220587	3.95905	7.52486e-05	0.00412208
Larp1	protein_coding	207.101	0.874779	0.245603	3.56177	0.000368366	0.0143042
Tmem256	protein_coding	321.771	0.876071	0.209216	4.1874	2.82165e-05	0.00184561
Mbd6	protein_coding	381.978	0.881258	0.203201	4.33687	1.44525e-05	0.001077
Shmt1	protein_coding	338.257	0.88509	0.200373	4.41722	9.99791e-06	0.000790755
Trim56	protein_coding	545.649	0.904474	0.188902	4.78806	1.68398e-06	0.000185554
Snhg12	lincRNA	117.976	0.912505	0.278195	3.28009	0.00103773	0.0295982
Igsf23	protein_coding	476.889	0.923671	0.1861	4.9633	6.93064e-07	8.59133e-05
Sema4a	protein_coding	1048.49	0.930539	0.200405	4.64329	3.42912e-06	0.000327468
Pde4d	protein_coding	270.42	0.937846	0.239545	3.91511	9.03638e-05	0.00485404
Car12	protein_coding	199.109	0.941961	0.220907	4.26405	2.00751e-05	0.00140657
Cdkn1b	protein_coding	1172.11	0.943283	0.154355	6.11113	9.8928e-10	2.18205e-07
Hsf2	protein_coding	170.9	0.944425	0.265647	3.55519	0.000377709	0.0145356
Igfbp4	protein_coding	3706.25	0.948059	0.214	4.43019	9.41496e-06	0.000753899
Usp18	protein_coding	2317.75	0.963711	0.167714	5.74617	9.12897e-09	1.6122e-06
Scarb1	protein_coding	245.217	0.984739	0.246805	3.98994	6.60898e-05	0.00373697
Tmem120b	protein_coding	162.566	0.992178	0.275048	3.60729	0.000309407	0.0124449
Satb1	protein_coding	2500.35	1.00393	0.163838	6.12759	8.92203e-10	2.05398e-07
Abca1	protein_coding	346.029	1.01707	0.29809	3.41196	0.000644976	0.0212661
Zfas1	processed_transcript	391.601	1.02551	0.149185	6.87405	6.24029e-12	1.87093e-09
Gm48876	lincRNA	113.665	1.0306	0.328286	3.13933	0.00169333	0.0423533
Oasl1	protein_coding	241.791	1.03307	0.307414	3.36053	0.000777944	0.0242755
A630081D01Rik	TEC	63.7029	1.0343	0.330378	3.13067	0.00174409	0.0430744
Slc39a1	protein_coding	817.854	1.03949	0.145754	7.13186	9.90218e-13	3.75467e-10
Lss	protein_coding	347.622	1.04073	0.218416	4.76489	1.8896e-06	0.000204712
Pan3	protein_coding	1007.23	1.04196	0.169238	6.15677	7.42417e-10	1.74022e-07
Gm45716	protein_coding	151.208	1.05476	0.296645	3.55563	0.000377069	0.0145356
Dctd	protein_coding	96.5749	1.05507	0.313133	3.36941	0.00075329	0.0238025
Irak3	protein_coding	179.984	1.0628	0.327002	3.25013	0.00115353	0.0322588
Mtln	protein_coding	194.461	1.06316	0.221179	4.80677	1.53392e-06	0.000173467
Gm12892	processed_pseudogene	62.9582	1.06929	0.337521	3.16807	0.00153456	0.0394881
Tm7sf2	protein_coding	210.87	1.07724	0.25762	4.18151	2.89578e-05	0.00186006
Ckb	protein_coding	943.22	1.0963	0.151262	7.24771	4.23872e-13	1.70768e-10
Tcrg-C1	TR_C_gene	145.576	1.10349	0.342405	3.22276	0.00126961	0.0343862
Oas2	protein_coding	255.287	1.11277	0.323603	3.4387	0.000584523	0.0199356
Mvd	protein_coding	901.81	1.11758	0.168137	6.64685	2.99439e-11	8.5786e-09
Akap1	protein_coding	63.1608	1.1188	0.360442	3.10397	0.00190942	0.0450848
Ptgir	protein_coding	299.393	1.11934	0.270767	4.13394	3.56601e-05	0.00217882
Pcsk4	protein_coding	418.749	1.12592	0.206842	5.44338	5.22791e-08	8.02359e-06
Gm37169	TEC	89.8932	1.12661	0.33584	3.35461	0.000794768	0.0246302
Neb	protein_coding	620.074	1.13336	0.265411	4.27022	1.95281e-05	0.00138327
Sell	protein_coding	21628.9	1.13575	0.24231	4.68719	2.76983e-06	0.000272413
Fdft1	protein_coding	1198.62	1.14474	0.119988	9.54044	1.42222e-21	2.29191e-18
C130036L24Rik	processed_transcript	73.7864	1.14621	0.360417	3.18023	0.0014716	0.0384046
Myc	protein_coding	4741.61	1.14999	0.161851	7.10525	1.20107e-12	4.42406e-10
A930029G22Rik	lincRNA	60.7925	1.15852	0.356066	3.25366	0.00113928	0.0319294
Msmo1	protein_coding	1471.48	1.16391	0.109371	10.6418	1.90369e-26	4.0904e-23
Il1rl1	protein_coding	448.773	1.17093	0.332903	3.51733	0.000435908	0.0162753
AA465934	processed_transcript	61.8875	1.18268	0.345464	3.42344	0.000618339	0.0207055
Gm14125	transcribed_processed_pseudogene	377.256	1.21481	0.337784	3.59641	0.000322633	0.0128376
Rad51b	protein_coding	153.711	1.22309	0.257408	4.75157	2.01846e-06	0.000213295
Fn3krp	protein_coding	92.7976	1.23161	0.352291	3.496	0.000472284	0.0171502
Pik3c2b	protein_coding	61.4094	1.24847	0.399609	3.12422	0.00178276	0.0434352
Mvk	protein_coding	311.821	1.26274	0.209328	6.03234	1.61607e-09	3.30704e-07
Mx2	polymorphic_pseudogene	183.996	1.26318	0.33574	3.76238	0.000168303	0.00780491
Tmem97	protein_coding	213.274	1.26616	0.246318	5.14035	2.74222e-07	3.74782e-05
Gm42646	TEC	265.428	1.2755	0.169601	7.52059	5.45317e-14	2.81209e-11
Nrip1	protein_coding	930.055	1.28984	0.173343	7.44094	9.99677e-14	4.95686e-11
Gm6781	processed_pseudogene	105.639	1.29382	0.274737	4.70931	2.48562e-06	0.000250348
Tent5a	protein_coding	556.3	1.29655	0.169375	7.65492	1.93431e-14	1.13351e-11
C230085N15Rik	TEC	875.963	1.29856	0.225337	5.76277	8.2746e-09	1.48161e-06
Snord104	snoRNA	74.4493	1.29908	0.341562	3.80335	0.000142755	0.0068163
Firre	processed_transcript	94.6967	1.30228	0.391596	3.32557	0.000882395	0.0264554
Aldoc	protein_coding	247.841	1.32025	0.235996	5.59438	2.21416e-08	3.61328e-06
Arglu1	protein_coding	753.259	1.33266	0.176432	7.5534	4.24056e-14	2.33767e-11
Gm35570	processed_pseudogene	36.5869	1.36236	0.41204	3.30639	0.000945071	0.0278652
Hmgcs1	protein_coding	1281.79	1.36951	0.193345	7.08325	1.40817e-12	5.04283e-10
Acaca	protein_coding	240.075	1.37914	0.288344	4.78297	1.7272e-06	0.000188704
AC121821.1	processed_transcript	83.1989	1.395	0.302343	4.61396	3.95062e-06	0.000371762
Bcl6	protein_coding	574.79	1.39799	0.271518	5.14879	2.62172e-07	3.63432e-05
Tbl1xr1	protein_coding	1596.92	1.40351	0.16609	8.45031	2.9052e-17	2.20317e-14
9430081H08Rik	TEC	40.0587	1.42487	0.412649	3.453	0.000554397	0.0193693
Gm3571	processed_pseudogene	142.981	1.43426	0.222038	6.45951	1.05041e-10	2.65527e-08
Cd86	protein_coding	1123.53	1.45062	0.155771	9.31249	1.24873e-20	1.46351e-17
Insig1	protein_coding	1153.8	1.45877	0.157965	9.23476	2.58859e-20	2.56709e-17
Acsl3	protein_coding	354.793	1.47208	0.224988	6.54292	6.03284e-11	1.58725e-08
Fdps	protein_coding	128.104	1.48054	0.243027	6.09207	1.11463e-09	2.39497e-07
Fhl3	protein_coding	151.209	1.50086	0.268765	5.5843	2.3465e-08	3.78139e-06
B430306N03Rik	protein_coding	109.256	1.52233	0.394298	3.86086	0.00011299	0.0057124
Gm12940	processed_transcript	287.014	1.53424	0.218987	7.00607	2.45104e-12	8.10224e-10
Cyp51	protein_coding	1792.74	1.59375	0.167824	9.49656	2.16948e-21	3.10766e-18
Plac8	protein_coding	94.1794	1.62143	0.517826	3.13122	0.00174082	0.0430744
Nlgn2	protein_coding	40.489	1.63365	0.479143	3.40953	0.000650753	0.0214018
Gm38034	TEC	37.0888	1.63752	0.509794	3.21212	0.00131757	0.0353878
E430014B02Rik	TEC	160.119	1.68307	0.384132	4.38148	1.17877e-05	0.000915461
Ldlr	protein_coding	1833.63	1.71709	0.185407	9.26118	2.02184e-20	2.17213e-17
Gm48236	lincRNA	27.7991	1.72887	0.501678	3.44617	0.000568588	0.0197144
Gm20696	protein_coding	511.075	1.73827	0.269962	6.43895	1.20304e-10	2.92633e-08
Gm16086	lincRNA	28.4914	1.77867	0.573733	3.10016	0.00193414	0.0455849
Gm13546	antisense	149.86	1.79003	0.313479	5.71021	1.12838e-08	1.96581e-06
Zfp608	protein_coding	78.7925	1.79051	0.371066	4.8253	1.39791e-06	0.00016236
Osgin1	protein_coding	604.391	1.79335	0.192141	9.3335	1.02431e-20	1.32055e-17
Ky	protein_coding	77.1768	1.828	0.386369	4.73124	2.23152e-06	0.00023015
Gm32633	lincRNA	143.469	1.85191	0.352177	5.25845	1.45274e-07	2.12826e-05
Lztfl1	protein_coding	383.113	1.91801	0.249668	7.68225	1.56321e-14	9.59663e-12
Gm6776	processed_pseudogene	33.4659	1.92266	0.438768	4.38195	1.17619e-05	0.000915461
Gm37248	TEC	182.023	1.95484	0.326169	5.99333	2.05585e-09	4.14125e-07
Dhcr24	protein_coding	87.3739	1.96293	0.316446	6.20306	5.53754e-10	1.32204e-07
Sqle	protein_coding	1405.87	2.00319	0.128668	15.5687	1.18862e-54	7.66181e-51
Gm13502	processed_pseudogene	198.503	2.02822	0.242496	8.36395	6.06516e-17	4.11537e-14
Fgd2	protein_coding	31.7287	2.0549	0.65475	3.13844	0.00169847	0.0423533
Idi1	protein_coding	624.3	2.08531	0.188861	11.0415	2.40905e-28	6.21151e-25
Gm19585	lincRNA	770.644	2.10503	0.1572	13.3907	6.84977e-41	2.94357e-37
Pde3b	protein_coding	73.6813	2.12408	0.514569	4.12788	3.66129e-05	0.00222648
Scd2	protein_coding	2778.59	2.13947	0.131345	16.2889	1.18278e-59	1.52484e-55
Ncf1	protein_coding	450.312	2.2605	0.268902	8.40641	4.22762e-17	3.02792e-14
Tmem273	protein_coding	139.96	2.30642	0.329202	7.00607	2.45102e-12	8.10224e-10
Gm43672	lincRNA	248.042	2.31283	0.223939	10.328	5.26726e-25	9.70079e-22
A430072P03Rik	processed_transcript	30.2386	2.35123	0.525307	4.47591	7.6085e-06	0.000645321
Scd1	protein_coding	37.0979	2.36182	0.522535	4.51993	6.18598e-06	0.000549997
Stra6	protein_coding	204.317	2.39002	0.347925	6.86935	6.44947e-12	1.88969e-09
Ccr9	protein_coding	413.011	2.40691	0.208694	11.5332	8.97276e-31	2.89192e-27
Grifin	protein_coding	59.1477	2.44426	0.644308	3.79362	0.000148468	0.00703695
Sorcs2	protein_coding	285.808	2.63985	0.469393	5.62397	1.86618e-08	3.08446e-06
Bpifa2	protein_coding	62.3143	2.89415	0.926289	3.12446	0.00178133	0.0434352
Scd4	protein_coding	35.9925	2.94318	0.765698	3.84379	0.00012115	0.00598416
A930002I21Rik	lincRNA	71.4813	3.25529	0.472507	6.88939	5.60322e-12	1.71992e-09
Tuba8	protein_coding	34.3639	3.31227	0.799637	4.14222	3.43962e-05	0.0021116
Cyp11a1	protein_coding	25.4433	3.52684	0.789865	4.46511	8.0026e-06	0.000669932
Cyp26b1	protein_coding	41.192	3.7383	0.861944	4.33705	1.44405e-05	0.001077
Epas1	protein_coding	127.448	4.37897	0.501333	8.73465	2.44404e-18	1.96929e-15
1700061F12Rik	lincRNA	40.9728	5.43994	0.737676	7.37443	1.65048e-13	7.88073e-11
Xist	lincRNA	719.042	9.85514	1.08553	9.07861	1.09968e-19	1.01265e-16

## Sheet: Supplementary file 1c
Supplementary file 1c. GSEA hallmark gene sets in naive Treg cells
pathway	pval	padj	log2err	ES	NES	size	leadingEdge
HALLMARK_G2M_CHECKPOINT	3.24475e-15	1.19648e-13	1.00732	0.647333	2.44086	181	Pbk/Hmmr/Ccnb2/Bub1/Ccna2/Ttk/Kif2c/Aurkb/Cdkn3/Nek2/Tpx2/Cdk1/Kif11/Cenpf/Espl1/Plk1/Exo1/Cdc6/Chek1/Mki67/Cenpe/Cks1b/Rad54l/Marcks/Aurka/Kif4/Kif22/Ccnf/Top2a/Gins2/Racgap1/Mybl2/Cks2/Kif15/Stmn1/Cdc20/Sqle/Kif23/Bard1/Tacc3/Knl1/Kmt5a/Slc7a5/Atf5/Traip/Pole/Ccnd1/Cdc45/Tfdp1/Kif20b/Pura/Prim2/Polq/Orc6/Brca2/Cdkn1b/Kpna2/Myc/Chaf1a/Dbf4/Kpnb1/Cul3/Hnrnpd/Cenpa/Pola2/Odc1/Rps6ka5
HALLMARK_E2F_TARGETS	4.78593e-15	1.19648e-13	0.996986	0.631419	2.41455	194	E2f8/Hmmr/Ccnb2/Depdc1a/Mxd3/Kif2c/Aurkb/Cdkn3/Cdk1/Kif18b/Spc24/Espl1/Plk1/Chek1/Mki67/Cdca3/Cit/Cenpe/Cdca8/Cks1b/Rad51ap1/Aurka/Kif4/Kif22/Spc25/Top2a/Spag5/Cenpm/Racgap1/Mybl2/Tk1/Cks2/Stmn1/Chek2/Cdc20/Dlgap5/Asf1b/Bard1/Tacc3/Cdkn1a/Hells/Dctpp1/Ung/Pole/Diaph3/Gins1/Ube2t/Wdr90/Prim2/Mms22l/Orc6/Brca2/Cdkn1b/Kpna2/Shmt1/Myc
HALLMARK_MITOTIC_SPINDLE	6.4349e-06	0.000107248	0.610527	0.488858	1.84334	183	Ccnb2/Bub1/Ttk/Kif2c/Nek2/Tpx2/Cdk1/Kif11/Cenpf/Kntc1/Espl1/Plk1/Cenpe/Anln/Marcks/Aurka/Kif4/Kif22/Top2a/Ect2/Pif1/Fgd6/Racgap1/Kif15/Trio/Dlgap5/Kif23/Vcl/Arhgap29/Dynll2/Rasa1/Bcar1/Kif20b/Mid1ip1/Sass6/Mid1/Brca2/Arhgef11/Arf6/Rictor/Sos1/Tubd1/Cttn/Bcr/Sac3d1
HALLMARK_SPERMATOGENESIS	0.000103022	0.00128777	0.538434	0.561929	1.86991	76	Ccnb2/Bub1/Mlf1/Ttk/Kif2c/Cdkn3/Nek2/Cdk1/Ncaph/Aurka/Gfi1/Ace/Nphp1/Tnp2/Pcsk4
HALLMARK_EPITHELIAL_MESENCHYMAL_TRANSITION	0.000884356	0.00884356	0.477271	-0.517461	-1.72104	90	Fn1/Tgfbi/Col1a1/Mmp14/Nid2/Lrp1/Col1a2/Adam12/Snai2/Vcam1/Areg/Capg/Jun/Ecm1/Comp/Gem/Fgf2/Serpine2
HALLMARK_COMPLEMENT	0.00113977	0.00949805	0.45506	-0.464894	-1.6349	134	Fn1/Pla2g7/Mmp14/C3/Lrp1/Gzmk/Src/Ang/Serpinc1/Plek/Gca/Pdgfb/Cpq/F8/Gnb4/Pfn1/Anxa5/Irf1/Ctss/Plscr1/Lck/Cxcl2/Calm1/Dpp4/Ctsd/Pdp1/Lyn/C1qa/Pim1/Prcp/Lcp2/Lta4h/Gnai3/Psen1/Fcer1g
HALLMARK_IL2_STAT5_SIGNALING	0.00153588	0.0109706	0.45506	-0.416907	-1.5347	185	Serpinc1/Capg/Gpr83/Itgae/Irf6/Gbp3/Cdkn1c/Myo1e/Muc1/Ecm1/Penk/Il2rb/Ltb/Ikzf2/Cdcp1/Tnfrsf9/Ndrg1/Nrp1/Plpp1/Cst7/Cd81/Ctla4/Socs1/Tnfrsf8/Fah/Cd79b/Swap70/Tnfrsf18/Irf8/Sell/Tiam1/Csf1/Smpdl3a/Drc1/Il2ra/Galm/Gpx4/Slc2a3/Plscr1/Cd83/Rhoh/Capn3/Rgs16/Tnfrsf4/Il4ra/Cdc42se2/Gata1/Ccnd2/Traf1/Cish/Rnh1/Slc39a8/P4ha1/Wls/Il3ra/Pim1/Nt5e/Socs2/Etfbkmt/Tlr7/Sh3bgrl2/Enpp1/Nfil3/Serpinb6a/Ikzf4/Irf4/…
HALLMARK_MYC_TARGETS_V2	0.00529644	0.0306242	0.407018	0.533588	1.70108	57	Plk1/Tmem97/Hk2/Slc29a2/Utp20/Dctpp1/Ung/Ndufaf4/Myc/Srm/Slc19a1/Gnl3/Aimp2/Pprc1/Rrp12/Supv3l1/Tfb2m/Pa2g4/Nop16/Pus1/Nolc1/Ipo4/Rcl1/Rrp9/Bysl/Hspd1/Tbrg4/Mybbp1a/Grwd1/Nop56/Cbx3/Hspe1/Nip7/Rabepk/Ppan
HALLMARK_COAGULATION	0.00551236	0.0306242	0.407018	-0.535179	-1.6972	67	Rapgef3/Fn1/Mmp14/C3/Lrp1/Ang/Serpinc1/Plek/Pdgfb/Comp/Cpq/F8/Crip2
HALLMARK_ESTROGEN_RESPONSE_LATE	0.00677575	0.0307989	0.407018	0.411585	1.48287	127	Cyp26b1/Ltf/Slc1a4/Cdc6/Papss2/Ckb/Top2a/Gins2/Id2/Celsr2/Tst/Cdc20/Rapgefl1/Nrip1/Scarb1/Xrcc3/Lsr/Car12/Egr3/Slc7a5/Anxa9/Gla/Abhd2/Cacna2d2/Ccnd1/Ret/Jak2/Fdft1/Clic3/Lamc2/Mest/Sult2b1/Gale/Igfbp4/Kif20a/Fkbp5/Impa2/Farp1/Tmprss3/Nbl1/Il17rb/Rbbp8/Slc16a1/Slc2a8/Wfs1/Chpt1
HALLMARK_APICAL_JUNCTION	0.00658034	0.0307989	0.407018	-0.440932	-1.53189	121	Nectin2/Tgfbi/Actg2/Lima1/Icam5/Cd209b/Vcam1/Src/Cx3cl1/Sirpa/Acta1/Gamt/Itga9/Actg1/Actb/Pfn1/Cnn2/Rac2/Tmem8b/Pik3r3/Baiap2/Sorbs3/Msn/Cercam/Col16a1
HALLMARK_MTORC1_SIGNALING	0.00841302	0.0350543	0.38073	0.373052	1.41491	187	Bub1/Plk1/Slc1a4/Asns/Scd2/Aurka/Plod2/Ccnf/Bcat1/Bhlhe40/Idi1/Sqle/Tmem97/Hk2/Tm7sf2/Cdkn1a/Scd1/Insig1/Ldlr/Acaca/Slc7a5/Dhcr24/Ung/Hmgcs1/Cyp51/Gla/Acsl3/Fads1/Stard4/Tpi1/Cxcr4/Psme3/Ifi30/Hmgcr/Elovl6/Pno1/Etf1/Sdf2l1/Cfp/Glrx/Fkbp2/Sytl2/Tfrc/Nmt1/Srd5a1/Nup205
HALLMARK_INTERFERON_GAMMA_RESPONSE	0.0134435	0.0517058	0.38073	-0.393517	-1.42683	170	St3gal5/Vcam1/Gbp3/H2-Q7/H2-D1/Irf5/Cd38/Il2rb/B2m/Txnip/Gm8909/Ly6e/H2-Q10/Socs1/Slamf7/Samhd1/Irf8/Tapbp/Peli1/Csf2rb2/Psme1/Irf1/Gbp10/Psmb8/Cd74/Stat1/Plscr1/Itgb7/Cmpk2/Psmb10/Nfkbia/Gch1/Il4ra/Tap1/Gbp9/Eif4e3/Pim1/Ube2l6/H2-Aa/Lcp2/Nod1/Ifi35/Irf4/Btg1/Tnfsf10/Zbp1/Irf9/Psme2/Lats2/Icam1/Gbp8/Casp8/Bpgm/Psma2/Nmi/Il15ra/Gbp4/Pfkp/Hif1a/Nampt/Il10ra/Psmb2/Mvp/Stat3/Rnf31/Ptpn6
HALLMARK_TNFA_SIGNALING_VIA_NFKB	0.0197471	0.0705255	0.352488	-0.397032	-1.42838	158	Gfpt2/Dram1/Ccl4/Fut4/Areg/Cd80/Plek/Fosb/Ccl20/Hbegf/Jun/Ccrl2/Gem/Tnfrsf9/Sdc4/Fosl2/Csf1/Irf1/Litaf/Slc2a3/Cd83/Slc2a6/Stat5a/Nfkbia/Gch1/Dusp4/Dusp2/Btg2/Cxcl2/Tap1/Eif1/Btg3/Traf1/Gadd45a/Nr4a2/Pnrc1/Rnf19b/Sqstm1/Relb/Nfil3/Btg1/Sat1/Rela/Dusp1/Tubb2a/Icam1/Ptpre/Plk2/Egr2/Klf10/Ppp1r15a/Phlda1/Clcf1/Il15ra/Pfkfb3/Klf9/Mcl1/Nampt
HALLMARK_CHOLESTEROL_HOMEOSTASIS	0.0222435	0.0741448	0.352488	0.472096	1.50204	59	Scd2/Aldoc/Idi1/Lss/Sqle/Tmem97/Mvk/Hsd17b7/Tm7sf2/Scd1/Ldlr/Fdps/Atf5/Hmgcs1/Cyp51/Mvd/Fdft1/Stard4/Nsdhl/Atxn2/Hmgcr/Pmvk/Gstm7
HALLMARK_UV_RESPONSE_UP	0.0257346	0.0756899	0.352488	-0.397991	-1.40556	130	Mmp14/Nptxr/H2-Q1/Mapk8ip2/H2-Q2/Cdo1/Plcl1/Fosb/Cdkn1c/Cdkn2b/Epcam/Maoa/Irf1/Cnp/Ephx1/Tmbim6/Chka/Nfkbia/Gch1/Btg2/Tap1/Btg3/Lyn/Tuba4a/Sqstm1/Selenow/Dnaja1/Btg1/Bid
HALLMARK_APICAL_SURFACE	0.0251238	0.0756899	0.352488	-0.632901	-1.62785	23	Gstm5/Cx3cl1/Akap7/Cd160/Il2rb/Tmem8b/Sulf2/Crocc/Lyn/Il2rg
HALLMARK_KRAS_SIGNALING_UP	0.0483871	0.134409	0.276501	-0.386761	-1.3475	124	Aldh1a2/Gfpt2/Clec4a3/Evi5/Il1rl2/Kif5c/Adgra2/Ccl20/Scg5/Hbegf/F13a1/Nrp1/Mtmr10/Irf8/Tnnt2/Map7/Ctss/Psmb8/Dnmbp/Map3k1/Laptm5/Hdac9/Rgs16/Mafb/Tmem158/Itgb2/Ccnd2/Mmp11/Traf1/Ets1/Vwa5a/Mmd/Avl9/Lcp1
HALLMARK_ESTROGEN_RESPONSE_EARLY	0.094382	0.248374	0.21925	0.349469	1.2612	129	Cyp26b1/Mybl1/Krt18/Slc1a4/Papss2/Bhlhe40/Celsr2/Hes1/Olfml3/Akap1/Rapgefl1/Nrip1/Scarb1/Deptor/Car12/Egr3/Slc7a5/Anxa9/Gla/Abhd2/Ccnd1/Ret/Jak2/Fdft1/Clic3/Nav2/Ugcg/Sult2b1/Igfbp4/Myc/Fkbp5/Farp1/Slc19a2/Tmprss3/Nbl1/Il17rb/Rbbp8/Tgm2/Celsr1/Slc16a1/Wfs1/Chpt1/Pex11a
HALLMARK_INFLAMMATORY_RESPONSE	0.163701	0.409253	0.143759	-0.33642	-1.18414	127	Fzd5/Mmp14/Itgb8/Nmur1/Cx3cl1/Axl/Ccl20/Best1/Hbegf/Il2rb/Ccrl2/Nod2/Tnfrsf9/Ptafr/Ly6e/Tapbp/Sell/Csf1/Irf1/Rgs1/Lck/Bdkrb1/Rgs16/Nfkbia/Gch1/Itga5/Btg2/Acvr2a/Il4ra/Emp3/Lyn/Lta/Lcp2/Calcrl/Cd82/Gnai3/Slamf1/Psen1/Tnfsf10/Rela/Tnfrsf1b/Icam1/Ptpre/Slc28a2
HALLMARK_ALLOGRAFT_REJECTION	0.174825	0.41625	0.137251	-0.317432	-1.14871	163	Ccl4/Cd8a/Cd80/Capg/H2-Q7/Igsf6/Il2rb/Ltb/Gbp2/B2m/Ly86/Prf1/Cd96/H2-Q10/H2-T23/Socs1/Irf8/Cd2/Tapbp/Rps19/Csf1/Ctss/H2-Ob/Il2ra/Cd7/Spi1/Cd74/Stat1/Srgn/Hdac9/Lck/Psmb10/Il16/Acvr2a/Il4ra/Rps9/Itgb2/Tap1/H2-Oa/Cd1d1/Ccnd2/Eif5a/Ets1/Cd3g/Lyn/Flna/H2-Aa/Lcp2/Cd3d/Ptprc/Il2rg/Irf4/Hcls1/Tap2/Cd3e/Icam1/Prkcb/Rps3a1/Sit1
HALLMARK_WNT_BETA_CATENIN_SIGNALING	0.200864	0.423977	0.142901	0.437256	1.21423	29	Csnk1e/Ppard/Notch4/Myc/Hey1/Skp2/Maml1/Axin2/Hdac5/Axin1/Hdac2/Rbpj/Ncor2
HALLMARK_P53_PATHWAY	0.203509	0.423977	0.126254	-0.310888	-1.12946	167	Dram1/St14/Cdkn2b/Cebpa/Hbegf/Jun/Txnip/Ndrg1/Slc35d1/Cd81/Socs1/Ldhb/Hspa4l/Prmt2/Ephx1/Dgka/Baiap2/Rpl18/Rgs16/Btg2/Krt17/Tap1/Ccnd2/Slc7a11/S100a10/Ctsd/Steap3/Vwa5a/Gadd45a/Ccng1/Trib3/Rnf19b/Cd82/Def6/Rpl36/Btg1/Sat1/Zfp36l1/Ptpre/Perp/Plk2/Gm2a
HALLMARK_NOTCH_SIGNALING	0.195446	0.423977	0.135002	-0.470556	-1.21029	23	Fzd5/Tcf7l2
HALLMARK_INTERFERON_ALPHA_RESPONSE	0.255773	0.508439	0.111463	-0.338965	-1.11625	87	Gbp3/H2-Q7/Ccrl2/Gbp2/B2m/Txnip/Ly6e/H2-Q10/Psme1/Sell/Csf1/Irf1/Cnp/Psmb8/Cd74/Mov10/Plscr1/Cmpk2/Il4ra/Tap1
HALLMARK_KRAS_SIGNALING_DN	0.264388	0.508439	0.110122	-0.350803	-1.12424	73	Tex15/Zfp112/Cd80/Brdt/Hc/Stag3/Gamt/Synpo/Tcf7l1/Selenop/Btg2/Cpeb3/Fgf16/Cyp39a1/Arpp21/Pdcd1/Nr4a2
HALLMARK_ANDROGEN_RESPONSE	0.297483	0.531219	0.118288	0.319605	1.09262	86	Klk1b27/Scd2/Idi1/Cenpn/Scd1/Gucy1a1/Insig1/Dhcr24/Hmgcs1/Srf/Abhd2/Acsl3/Ccnd1/Fads1/Maf/Akt1/Sec24d/Hmgcr/Pmepa1/Fkbp5
HALLMARK_ANGIOGENESIS	0.296435	0.531219	0.105521	-0.522634	-1.17007	12	Slco2a1/Nrp1/Pglyrp1/Ccnd2
HALLMARK_MYOGENESIS	0.397887	0.663146	0.0845557	-0.303124	-1.02608	100	Col1a1/Mef2c/Itga7/Adam12/Pgam2/Dapk2/Hbegf/Fgf2/Acta1/Sorbs1/Cnn3/Dmd/Tnnt2/Erbb3/Lsp1/Sorbs3/Tpm3
HALLMARK_UV_RESPONSE_DN	0.389085	0.663146	0.0857844	-0.304127	-1.02845	99	Col1a1/Col1a2/Snai2/Plcb4/Cdc42bpa/Nrp1/Id1/Fhl2/Prkar2b/Pik3r3/Acvr2a/Pparg/Kalrn/Nr1d2
HALLMARK_PEROXISOME	0.455357	0.682204	0.0902635	0.294918	0.991749	79	Top2a/Idi1/Abcb9/Fdps/Hsd17b11/Dhcr24/Fads1/Dlg4/Sult2b1/Ctps/Pex11a/Acsl1/Retsat/Elovl5/Acsl4/Abcb4/Sod2/Ctbp1/Pex2/Gnpat/Slc25a4/Idh1/Idh2/Abcb1a/Mlycd/Smarcc1/Eci2
HALLMARK_GLYCOLYSIS	0.45977	0.682204	0.0913924	0.269898	0.985662	145	Hmmr/Depdc1a/Cdk1/Ppfia4/Sdc1/Chst2/Aurka/Plod2/Ppp2cb/Stmn1/Hk2
HALLMARK_IL6_JAK_STAT3_SIGNALING	0.463899	0.682204	0.0776799	-0.318954	-0.996676	65	Il13ra1/Jun/Cd38/Ltb/Socs1/Csf2rb2/Il9r/Csf1/Irf1/Il2ra/Stat1/Il4ra/Cxcl2/Il3ra/Pim1/Il17ra/Il2rg/Cd9/Tnfrsf1b/Irf9/Itga4/Il10rb/Il15ra
HALLMARK_HYPOXIA	0.424908	0.682204	0.0831291	-0.291448	-1.02287	133	Tgfbi/Kif5a/Pdgfb/Cdkn1c/Pgam2/Jun/Csrp2/Ndrg1/Sdc4/Fosl2/Cavin1/Eno1/Map3k1/Slc2a3/Tktl1/Ldha/Ets1/P4ha1/Grhpr/Pim1/Pnrc1/Gapdh/Nfil3/Bnip3l/Akap12/Btg1/Lxn/Hk1/Dusp1/Prkca/Sdc3/Slc2a1/Ilvbl/Ext1/Ppp1r15a/Casp6/Pfkfb3/Pfkp/Rragd/Aldoa/Pfkl/Wsb1/Rora
HALLMARK_HEDGEHOG_SIGNALING	0.536538	0.766484	0.0734381	-0.383011	-0.969494	22	Nrp2/Adgrg1/Nrp1
HALLMARK_BILE_ACID_METABOLISM	0.561837	0.78033	0.0668966	-0.293163	-0.934156	68	Nr3c2/Efhc1/Abca5/Optn
HALLMARK_ADIPOGENESIS	0.592199	0.800268	0.0645031	-0.259987	-0.945053	172	C3/Itga7/Ptger3/Sowahc/Ubc/Sorbs1/Ucp2/Fah/Atp1b3/Cavin1/Sqor/Gpx4/Pqlc3/Chchd10/Stat5a/Pparg/Gadd45a/Ndufa5/Gpam/Cd151/Crat/Itsn1/Reep5/Ndufb7/Uqcrc1/Scp2/Aldh2/Aplp2/Pfkfb3/Mgst3/Phyh/Aldoa/Pfkl/Atp5o/Apoe/Nabp1/Ghitm/Acads/Angptl4/Ifngr1/Sod1/Samm50/Slc1a5/Esrra/Acox1/Immt/Cox6a1/Ech1/Cox8a/Esyt1
HALLMARK_HEME_METABOLISM	0.614035	0.807941	0.062249	-0.259713	-0.932438	157	C3/Hbb-bt/Xk/Endod1/Igsf3/Pdzk1ip1/Slc30a1/Optn/Slc4a1/Tns1/Ucp2/E2f2/Cast/Abcg2/Sptb/Ypel5/Btg2/Atp6v0a1/Gata1/Alas2/Slc7a11
HALLMARK_APOPTOSIS	0.695946	0.892238	0.0683111	0.24617	0.88819	131	Emp1/Krt18/Anxa1/Top2a/Lmna/Gna15/Plat/Fasl/Cdkn1a/Gucy2e/Egr3/Ptk2/Bik/Bmf/Ifitm3/Ccnd1/Nefh/Cdkn1b/Casp4
HALLMARK_OXIDATIVE_PHOSPHORYLATION	0.740995	0.926244	0.0523759	-0.242672	-0.896662	194	Ldhb/Cox7a2l/Gpx4/Nqo2/Atp5c1/Atp5b/Ldha/Pdp1/Oat/Ndufa5/Atp5a1/Cyb5a/Cox4i1/Uqcrh/Nnt/Ndufb2/Cox6b1/Sdha/Ndufb7/Atp6v0c/Hadha/Uqcrc1/Atp6v1f/Ndufs2/Ndufa7/Slc25a5/Bax/Rhot1/Mgst3/Tomm22/Phyh/Atp5o/Atp1b1/Slc25a3/Pdha1/Atp6v1d/Glud1/Atp6v1g1/Casp7/Hccs/Isca1/Hadhb/Gpi1/Atp6v0e/Immt/Atp5d/Mdh1/Cox6a1/Atp5h/Uqcrc2/Ech1/Cox8a/Cox6c/Atp5j/Uqcrfs1/Ndufs3/Atp5l/Cyc1/Pdhb/Ndufs7/Atp6v1e1/Slc25a11/Cycs/M…
HALLMARK_MYC_TARGETS_V1	0.935714	1	0.0567672	0.210375	0.806482	200	Ccna2/Cdc20/Tyms/Cdc45/Eif3b/Tfdp1/Rfc4/Kpna2/Myc/Fam120a/Kpnb1/Trim28/Dut/Hnrnpd/Srm/Etf1/Odc1/Gnl3/Ctps/Ap3s1/Aimp2/Gspt1/Hnrnpu/Ddx21/Mad2l1/Hdgf/Ndufab1/Pole3/Pcbp1/Rad23b/Pa2g4/Nop16/Tomm70a/Rps10/Nolc1/Ifrd1/Srsf1/Hdac2/Snrpd1/Nap1l1/Ssbp1/Rrp9/Prdx3/Hspd1/Cad/C1qbp/Apex1/Usp1/Set/Syncrip/Txnl4a/Pabpc4/Tardbp/Mcm2/Smarcc1/Nme1/Eif3j2/Cdk2/Snrpb2/Mrps18b/Nop56/Srpk1/Cbx3/Hspe1/Nhp2/Ncbp2/Pwp…
HALLMARK_UNFOLDED_PROTEIN_RESPONSE	0.947005	1	0.0546808	0.216974	0.754252	99	Slc1a4/Asns/Cks1b/Slc7a5/Dnaja4/Paip1/Khsrp/Tatdn2/Eif2ak3/Wfs1/Bag3/Hyou1/Dkc1/Exosc2
HALLMARK_PROTEIN_SECRETION	0.975169	1	0.0523759	0.197754	0.680177	88	Krt18/Abca1/Gla/Sec24d/Sgms1/Clcn3/Cd63/Vamp7/Ap3s1/Golga4/Atp1a1/Bet1/Rab9/Dop1a/Arfgap3/Ica1/Rab2a/Cln5/Uso1/Rab5a/Stx16
HALLMARK_FATTY_ACID_METABOLISM	0.995485	1	0.0514265	0.180587	0.647448	122	Idi1/Adh1/Hsd17b7/Tdo2/Kmt5a/Uros/Hsd17b11/Nthl1/Dhcr24/Hmgcs1/Nsdhl/Lgals1/Ccdc58/Odc1/Sdhd/Reep6/Acsl1/Retsat/Elovl5/Hsph1/Nbn/Acsl4/Acat3/Cpox/Gcdh/Fasn/Dld/G0s2/Idh1/Car2/Apex1/Mif/Mlycd/Acot2/Eci2/Gstz1/Mcee/Fh1/Eno2
HALLMARK_PANCREAS_BETA_CELLS	0.940803	1	0.0510114	0.247115	0.584257	13	Pcsk1/Elp4/Akt3
HALLMARK_DNA_REPAIR	1	1	0.0515309	0.145537	0.530652	142	Nme4/Rad51/Taf9/Tyms/Prim1/Rfc4/Pola1/Dut/Sac3d1/Pola2/Smad5/Rfc5/Bola2/Stx3/Pom121/Rpa3/Polh/Adcy6/Gtf2h3/Snapc4/Polr2d/Polr2h/Vps37b/Snapc5/Polr2f/Polb/Polr2g/Cstf3/Nme1/Aprt/Rfc3/Rnmt/Tarbp2/Mpg/Gtf2h5/Ncbp2
HALLMARK_REACTIVE_OXYGEN_SPECIES_PATHWAY	0.983271	1	0.0431037	-0.195179	-0.571338	47	Ftl1/Lsp1/Gpx4/Fes/Ndufs2/Mbp/Stk25/Pfkp/Junb/Sod1/Ipcef1/Lamtor5/Hmox2/Hhex/Sbno2/Pdlim1/Egln2/Prnp
HALLMARK_TGF_BETA_SIGNALING	0.931608	1	0.0453152	-0.241787	-0.698083	43	Cdkn1c/Id3/Id1/Rhoa/Ppp1ca/Ube2d3/Hdac1/Rab31/Klf10/Ppp1r15a/Arid4b/Junb
HALLMARK_PI3K_AKT_MTOR_SIGNALING	0.91771	1	0.0445071	-0.224656	-0.7516	94	Gna14/E2f1/Pfn1/Cfl1/Tiam1/Pik3r3/Lck/Arhgdia/Trib3/Rptor/Sqstm1/Ppp1ca/Il2rg/Nod1/Ube2d3/Rac1/Pak4/Prkcb/Slc2a1/Actr3/Arf1/Them4
HALLMARK_XENOBIOTIC_METABOLISM	0.843806	1	0.048506	-0.230055	-0.810894	129	Hgfac/Gsta3/Ddc/Cdo1/Mpp2/Slc35d1/Maoa/Fah/Irf8/Ccl25/Ephx1/Esr1/Tmbim6/Pros1/Psmb10/Gch1/Cndp2/Slc46a3/Slc12a4/Ndrg2/Cyb5a/Ap4b1/Gabarapl1/Ptges3

## Sheet: Supplementary file 1d
Supplementary file 1d. GSEA hallmark gene sets in effector Treg cells
pathway	pval	padj	log2err	ES	NES	size	leadingEdge
HALLMARK_CHOLESTEROL_HOMEOSTASIS	6.10928e-06	0.000305464	0.610527	0.646392	2.2411	54	Scd1/Scd2/Idi1/Sqle/Ldlr/Cyp51/Fdps/Hmgcs1/Aldoc/Tmem97/Mvk/Fdft1/Mvd/Tm7sf2/Lss/Sc5d/Srebf2/Hmgcr/Hsd17b7/Pcyt2/Tnfrsf12a/Cpeb2/Fabp5/Acat3/Nsdhl
HALLMARK_MTORC1_SIGNALING	3.84178e-05	0.000960444	0.557332	0.442481	1.82752	184	Scd1/Scd2/Idi1/Sqle/Dhcr24/Ldlr/Cyp51/Acsl3/Insig1/Acaca/Hmgcs1/Slc1a4/Cdkn1a/Tmem97/Fgl2/Tm7sf2/Cxcr4/Sc5d/Ddit4/Hmgcr/Sytl2/Ccnf/Elovl6/Gclc/Slc7a5/Gga2/Ung/Fkbp2/Psmg1/Hspe1/Stard4/Elovl5/Nmt1/Rdh11/Pdap1/Cfp/Nfil3/Nufip1/Dhcr7/Tfrc/Fads1/Eef1e1/Rrp9/Shmt2/Ppa1
HALLMARK_MYC_TARGETS_V1	0.00149698	0.0249496	0.45506	0.375668	1.5634	200	Myc/Cdc45/Nop16/Rfc4/Nme1/Srm/Ndufab1/Hspe1/Hdgf/Trim28/Pcbp1/Pabpc4/Snrpd1/Apex1/Tardbp/Lsm7/Set/Nolc1/Pa2g4/Tyms/Rrp9/Ssbp1/Erh/Kpnb1/Phb/Ruvbl2/Rack1/C1qbp/Cbx3/Txnl4a/Snrpa1/Mrpl23/Aimp2/Ifrd1/U2af1/Fam120a/Eif2s2/Snrpd2/Tfdp1/Nop56/Impdh2/Nhp2/Eif3b/Snrpa/Pwp1/Hnrnpd/Xrcc6/Lsm2/Eef1b2/Cct5/Rps10/Rnps1/Cdk4/Pold2/Eif1ax/Vdac1/Dut/Bub3/Etf1/Cdk2/Ctps/Srpk1/Eif2s1/Ranbp1/Gnl3/Npm1/Prdx3/Psma7/H…
HALLMARK_MYC_TARGETS_V2	0.00258362	0.0322953	0.431708	0.526045	1.83421	57	Tmem97/Slc29a2/Myc/Dctpp1/Nop16/Ung/Srm/Hspe1/Pus1/Mrto4/Nolc1/Pa2g4/Rrp9/Ndufaf4/Phb/Cbx3/Nip7/Aimp2/Rabepk/Nop56/Nop2/Ppan/Rrp12/Cdk4/Ipo4/Rcl1/Exosc5/Tfb2m/Gnl3/Npm1/Slc19a1/Pprc1/Grwd1/Tbrg4/Farsa/Wdr74
HALLMARK_REACTIVE_OXYGEN_SPECIES_PATHWAY	0.00340216	0.0340216	0.431708	-0.686602	-2.31363	46	Mpo
HALLMARK_COMPLEMENT	0.00450674	0.0375561	0.407018	-0.40307	-1.57899	118	Car2/Mmp14/Plek/Cpq/Gnb4/Serpinc1/Casp3/Spock2/Lipa/Cd40lg/Actn2/Timp2/Cd46/Dgkg/Dgkh/Ang/Lcp2/Pfn1/Irf1/Prcp/Plscr1/Ctss/Ctsd/Casp9/Anxa5/Psen1/Casp7/Sh2b3/Pik3cg/Ctsb/Cd55/Cd55b/Pdgfb/Lck/Dpp4/Prkcd/Gnai3/Lyn/Gmfb/Ctso
HALLMARK_ESTROGEN_RESPONSE_LATE	0.00809369	0.057812	0.38073	0.413444	1.60827	109	Cyp26b1/Cdc6/Slc1a4/Nrip1/Celsr2/Fdft1/Ckb/Scarb1/Chpt1/Igfbp4/Car12/Gins2/Jak2/Rps6ka2/Areg/Fkbp5/Abhd2/Slc7a5/Tob1/Fabp5/Ppif/Slc22a5/Bcl2/Elovl5
HALLMARK_ANDROGEN_RESPONSE	0.0110206	0.0633754	0.38073	0.439834	1.64057	82	Scd1/Scd2/Idi1/Dhcr24/Acsl3/Insig1/Srf/Hmgcs1/Cenpn/Hmgcr/Rab4a/Fkbp5/Abhd2/Pmepa1/Dbi/Elovl5
HALLMARK_ESTROGEN_RESPONSE_EARLY	0.0114076	0.0633754	0.38073	0.404916	1.57509	109	Cyp26b1/Slc1a4/Nrip1/Celsr2/Myc/Fdft1/Akap1/Scarb1/Chpt1/Igfbp4/Car12/Dhrs3/Jak2/Rps6ka2/Areg/Fkbp5/Nav2/Abhd2/Slc7a5/Tob1/Ppif/Slc22a5/Bcl2/Elovl5/Tubb2b/Ugcg/Siah2/Fasn
HALLMARK_IL2_STAT5_SIGNALING	0.0147604	0.0738022	0.38073	-0.368332	-1.52836	177	Car2/Alcam/Cst7/Itgae/Plpp1/Sh3bgrl2/Capg/Irf8/Gpr83/Serpinc1/Irf6/Ptch1/Gucy1b1/Myo1e/Casp3/Tnfrsf9/Drc1/Cd79b/Nt5e/Gbp3/Tiam1/Igf1r/Il2rb/Bmpr2/Il18r1/Ltb/Phtf2/Fah/She/Slc2a3/Lclat1/Prnp/Enpp1/Cyfip1/Nrp1/Csf1/Tlr7/Plscr1/Twsg1/Swap70/Penk/Traf1/Cd81
HALLMARK_UV_RESPONSE_UP	0.0252934	0.113158	0.352488	-0.363941	-1.4351	121	Car2/H2-Q1/Mmp14/H2-Q2/Fosb/Asns/Aqp3/Ntrk3/Casp3/Plcl1/Btg3/Clcn2/Hspa13/Cebpg/Ephx1/Il6st/Irf1/Btg2/Epcam/Bcl2l11/Tap1/Tst/E2f5/H2-M3/Abcb1a/Tmbim6/Hmox1/Aldoa
HALLMARK_ANGIOGENESIS	0.027158	0.113158	0.352488	-0.70213	-1.55438	9	S100a4/Nrp1/Pglyrp1/Itgav
HALLMARK_MYOGENESIS	0.0365498	0.121833	0.321776	0.397013	1.46628	77	Scd1/Scd2/Fdps/Cdkn1a/Ckb/Foxo4/Mapk12/Pygm/Gpx3/Pfkm/Nav2/Hdac5/Hbegf/Eno3/Plxnb2
HALLMARK_FATTY_ACID_METABOLISM	0.0338344	0.121833	0.321776	0.359008	1.40688	117	Idi1/Dhcr24/G0s2/Hmgcs1/Nthl1/Hsd17b7/Cryz/Eno2/Uros/Acat3/Nsdhl/Slc22a5/Kmt5a/Sdhd/Elovl5/Ccdc58/Eno3/Apex1/Mif/Rdh11/Glul/Fasn
HALLMARK_ALLOGRAFT_REJECTION	0.0347627	0.121833	0.321776	-0.389453	-1.57494	150	Gcnt1/Cd7/Capg/Il18rap/Irf8/Prf1/Ifng/Cd80/Cd96/H2-Q7/H2-Aa/Il2/Flna/Il2rb/Gbp2/Ltb/Il18/Stat1/Cd40lg/Cd74/B2m/Hif1a/Ly75/Hdac9/Srgn/Tapbp/Lcp2/F2r/Il16/Csf1/Ets1/Ctss/Fgr/Zap70/Ptprc/Tlr2/H2-Q10/Tap1/H2-T23/Bcat1/Itgb2/Cd28/H2-M3/Aars/Cd2/Lck/Cd3e/Sit1/Cd247/Cd3g/Lyn/Cd47/Cd1d1/Ifnar2/Tnf/Ccnd3/Psmb10/Ptpn6
HALLMARK_MITOTIC_SPINDLE	0.0408033	0.12751	0.321776	-0.327145	-1.34776	169	Palld/Synpo/Arhgap5/Kif11/Fgd6/Myo1e/Rapgef5/Ccdc88a/Clip1/Flna/Tiam1/Kif1b/Cdk1/Pdlim5/Als2/Nedd9/Incenp/Cntrl/Racgap1/Dock2/Hdac6/Ssh2/Flnb/Rab3gap1/Cdk5rap2/Tbcd/Bcl2l11/Plekhg2/Epb41l2/Smc4/Abr/Cdc42/Tubgcp5/Arhgap10/Dlg1/Smc1a/Arhgef11/Abl1/Clasp1/Myh9/Arhgap27/Arhgef2/Arhgef3/Tubgcp6/Cep57/Cep250/Numa1/Stk38l/Epb41/Csnk1d/Arhgdia/Sun2/Stau1/Pcm1
HALLMARK_G2M_CHECKPOINT	0.0460821	0.128006	0.321776	0.329022	1.34323	165	Sqle/Cdc6/Chek1/Myc/Rad54l/Cdkn1b/Gins2/Orc6/Mybl2/Sap30/Uck2/Pole/Cdc45/Ccnf/Upf1/Slc7a5/Exo1/Notch2/Tmpo/Chaf1a/Kmt5a/Traip/Cks1b/Kif22/Ube2s/Snrpd1/Prim2/Dkc1/Cenpe/Pura/Cbx1/Stmn1/Bcl3/Nolc1/E2f4/Sfpq/Kpnb1/Hmga1/Ccnb2
HALLMARK_E2F_TARGETS	0.0451505	0.128006	0.276501	0.320173	1.32261	181	Cdkn1a/Chek1/Myc/Cdkn1b/Shmt1/Rad51ap1/Orc6/Ccne1/Mybl2/Dctpp1/Pole/Rad51c/Trip13/Nme1/Ung/Tmpo/Psmc3ip/Cenpm/Rpa3/Lyar/Cks1b/Dlgap5/Kif22/Tk1/Ube2s/Bub1b/Prim2/Cdca3/Cenpe/Tipin/Stmn1/Nolc1/Tfrc/Pa2g4/Lig1/Hmga1/Cbx5/Ccnb2/Spc24/Mcm3/Gins4/Diaph3/Nop56/Naa38/Pold1/Hnrnpd/Xrcc6/Mlh1/Cdk4/Pop7/Pold2
HALLMARK_INFLAMMATORY_RESPONSE	0.0581197	0.152941	0.245042	0.337044	1.31401	114	Ldlr/Stab1/Cxcr6/Cdkn1a/Scarf1/Myc/Sell/Ptgir/Abca1/Ahr/Il10/Slc31a1/Tnfsf9/Rgs16/Mxd1/Gna15/Hbegf/Bst2/Itgb3/Ptger2/Chst2/Lif/Ptger4/Ccl5/Gpr183/Ebi3/Kcna3/Ifngr2/Irf7
HALLMARK_EPITHELIAL_MESENCHYMAL_TRANSITION	0.0611765	0.152941	0.282013	-0.381325	-1.38456	65	Matn2/Vcam1/Mmp14/Capg/Jun/Gem/Sgcb/Nt5e/Flna/Tgfbr3/Vim/Pfn2
HALLMARK_DNA_REPAIR	0.0681431	0.162245	0.224966	0.317551	1.27812	141	Nme4/Adcy6/Stx3/Rad51/Rfc4/Nme1/Bola2/Gtf2h3/Polr2h/Rpa3/Nt5c/Prim1/Fen1/Polr2d/Polr2j/Guk1/Sac3d1/Tyms/Nme3/Lig1/Polr1d/Polr2g/Impdh2/Pold1/Polr2i/Gtf2h5/Polr2f/Smad5/Nelfe/Polr2k/Taf12/Brf2/Dut/Polr2e/Gtf2a2
HALLMARK_HEME_METABOLISM	0.0761671	0.173107	0.257206	-0.326432	-1.30632	143	Car2/Hbb-bt/Tspan5/Daam1/Igsf3/Asns/Aqp3/Abcg2/Endod1/Tns1/Ctse/Optn/Kdm7a/Ucp2/Btg2/Ypel5/E2f2/Rnf19a/Bpgm/Tent5c/Xpo7/Btrc/Ctsb/Lrp10/Dcaf11/Clcn3/Myl4/Cast/Slc2a1/Ezh1/Ubac1/Ccnd3/Pdzk1ip1/Cir1/Nek7/Ncoa4/Top1/Bach1/Sdcbp
HALLMARK_INTERFERON_GAMMA_RESPONSE	0.0924574	0.187354	0.231127	-0.304753	-1.25108	166	Vcam1/St3gal5/Irf8/Slamf7/Bank1/Casp3/H2-Q7/Txnip/H2-Aa/Gbp3/Il2rb/H2-D1/Stat1/Cd74/H2-Eb1/B2m/Hif1a/Eif4e3/Tapbp/Isoc1/Lcp2/Trim26/Ifit2/Gm8909/Irf1/Plscr1/Ly6e/Bpgm/H2-Q10/Itgb7/Casp7/Samhd1/Tap1/Stat3/Ube2l6/Epsti1/Lats2/Peli1/Il15ra/H2-M3/Mthfd2/Pfkp/Slc25a28/Psme1/Ifih1/Gbp9/Psmb8/Oas3/Vamp5/Gbp4/Gpr18/Sppl2a/Ifnar2/Psmb10/Gbp10/Ptpn6/Ifi27/Mvp
HALLMARK_KRAS_SIGNALING_UP	0.0936768	0.187354	0.224966	-0.333542	-1.28162	105	Car2/Irf8/F2rl1/Kif5c/Scg5/Gucy1a1/Vwa5a/Spon1/Hdac9/Hsd11b1/Dnmbp/Map7/Lcp1/Etv5/Ikzf1/Nrp1/Ly96/Avl9/Ets1/Ctss/Ppp1r15a/Dock2/Glrx/Traf1/Bpgm/Akap12/Rabgap1l/Tmem176b/Tnfrsf1b/Mmp11/Itgb2/Abcb1a/Pecam1/Sdccag8/Map3k1/Psmb8/Tmem158/Laptm5
HALLMARK_COAGULATION	0.0877598	0.187354	0.231127	-0.382913	-1.34722	56	Mmp14/Plek/Cpq/Crip2/Serpinc1/Ctse/Gng12/Capn2/Ang/Casp9/Ctsb/Mmp11/Anxa1/Pdgfb/Pecam1
HALLMARK_P53_PATHWAY	0.106024	0.203892	0.213928	-0.299937	-1.2231	153	Stom/Trib3/Fgf13/S100a4/Jun/Hspa4l/Txnip/St14/Vwa5a/Ldhb/Ppm1d/Nudt15/Cd82/Ptpre/Baiap2/Abhd4/Wwp1/Hexim1/Rab40c/Dgka/S100a10/Ephx1/F2r/Ccng1/Btg2/Ctsd/Ppp1r15a/Apaf1/Kif13b/Cd81/Prmt2/Tap1/Tsc22d1/Acvr1b/Coq8a/Gadd45a
HALLMARK_SPERMATOGENESIS	0.136364	0.252525	0.181383	-0.355774	-1.26711	58	Art3/Tulp2/Hspa4l/Scg5/Rad17/Cdk1/Ezh2/She/Nf2/Map7/Gmcl1/Agfg1
HALLMARK_HYPOXIA	0.143098	0.255532	0.15017	0.305379	1.19966	119	Plac8/Cdkn1a/Aldoc/Angptl4/Scarb1/Cdkn1b/Car12/Cxcr4/Pygm/Ddit4/Sap30/Eno2/Foxo3/Klf7/Chst2/Bcl2/Tktl1/Eno3/Sdc4/Galk1/Mif/Siah2/Nfil3/Fam162a
HALLMARK_APOPTOSIS	0.154964	0.267179	0.175204	-0.301869	-1.18792	120	Mgmt/Pak1/Prf1/Jun/Casp3/Cdc25b/Txnip/Btg3/Tgfbr3/Il18/Pmaip1/Timp2/Madd/F2r/Nedd9/Irf1/Btg2/Casp9/Psen1/Ppp3r1/Casp7/Bcl2l11/Tap1/Hmgb2/Anxa1/Gadd45a/Plcb2/Hmox1/Cd2/Dnm1l/Pea15a/Diablo/Dap
HALLMARK_IL6_JAK_STAT3_SIGNALING	0.160465	0.267442	0.168238	-0.343734	-1.22862	60	Il13ra1/Jun/Il17rb/Il18r1/Ltb/Stat1/Il6st/Irf1/Csf1/Tlr2/Tnfrsf1b/Stat3/Acvr1b/Il15ra/Il17ra/Hmox1
HALLMARK_INTERFERON_ALPHA_RESPONSE	0.197232	0.318116	0.127505	0.312139	1.16874	87	Tent5a/Mx2/Sell/Oasl1/Usp18/Ifi44/Rsad2/Isg15/Oas1g/Trim25/Oas1a/Bst2/Tdrd7/Ifitm3/Helz2/Pnpt1/Lap3/Irf7/Ncoa7
HALLMARK_APICAL_JUNCTION	0.216471	0.338235	0.143759	-0.295079	-1.13154	102	Vcam1/Actg2/Pik3r3/Syk/Sirpa/Pard6g/Actg1/Exoc4/Baiap2/Acta1/Actn2/Nf2/Actb/Pfn1/Arhgef6/Cnn2/Traf1/Ptprc/Rac2/Msn/Epb41l2/Atp1a3
HALLMARK_WNT_BETA_CATENIN_SIGNALING	0.230476	0.349206	0.123257	0.405802	1.18772	26	Ppard/Myc/Hdac5/Axin2/Csnk1e/Kat2a/Rbpj
HALLMARK_PEROXISOME	0.286207	0.420875	0.102449	0.296883	1.09647	77	Idi1/Dhcr24/Fdps/Dhrs3/Gstk1/Elovl5/Abcb9/Atxn1/Rdh11/Fads1/Slc25a19/Hras/Dlg4/Ctbp1/Idh1/Hsd17b11
HALLMARK_BILE_ACID_METABOLISM	0.300712	0.420875	0.101351	0.312602	1.08837	58	Idi1/Dhcr24/Abca1/Pex26/Pfkm/Gstk1/Nedd4/Pecr/Lipe
HALLMARK_TNFA_SIGNALING_VIA_NFKB	0.30303	0.420875	0.0975449	0.263815	1.06736	144	Ldlr/G0s2/Bcl6/Cdkn1a/Myc/Sik1/Abca1/Trip10/Plk2/Kdm6b/Areg/B4galt5/Dusp5/Tubb2a/Tnfsf9/Pmepa1/Mxd1/Lamb3/Ier5/Hbegf/Lif/Ptger4/Ccl5/Gpr183/Map3k8/Sdc4/Nfil3/Ifngr2/Bcl3/Ets2/Zc3h12a/Dnajb4/Icosl
HALLMARK_KRAS_SIGNALING_DN	0.368881	0.475682	0.0883594	0.316556	1.05521	45	Mx2/Celsr2/Tg/Rsad2/Slc25a23/Fggy/Ypel1/Gpr19/Skil/Chst2/Rgs11
HALLMARK_PROTEIN_SECRETION	0.364286	0.475682	0.107554	-0.269523	-1.02046	86	Kif1b/Anp32e/Pam/Ap3b1/Cltc/Gbf1/Clcn3/Tmx1/Arfip1/Mapk1/Dnm1l/Atp7a/Vps45/Snx2/Stx7/Ocrl/Ctsc/Tom1l1/Lamp2/Stx12/Ap3s1/Sec31a/Tsg101/Ppt1/Stam/Gla/Tpd52/Copb2/Vps4b/Cog2/Rab14/Rab5a/Ap1g1/Arfgap3/Uso1/Arfgef2
HALLMARK_APICAL_SURFACE	0.371032	0.475682	0.095288	-0.401419	-1.06594	16	Cd160/Il2rb/Akap7/Lyn
HALLMARK_XENOBIOTIC_METABOLISM	0.43309	0.541363	0.0982123	-0.256792	-0.992744	113	Car2/Hgfac/Irf8/Ddc/Xdh/Fah/Pdlim5/Hsd11b1/Abcc3/Ephx1/Cyp2s1/Adh1/Abhd6/Tmem176b/Cndp2/Acp2/Bcat1/Tmbim6/Hacl1/Hmox1/Csad/Pink1
HALLMARK_UV_RESPONSE_DN	0.46283	0.564427	0.0934449	-0.256128	-0.963692	85	Gcnt1/Prkar2b/Mgmt/Pik3r3/Cdon/Fhl2/Igf1r/Tgfbr3/Nr1d2/Pdlim5/Nrp1/Synj2/Sfmbt1/Scaf8/Prkca/Grk5/Atp2b4/Cacna1a/Dlg1/Sipa1l1/Atp2c1
HALLMARK_HEDGEHOG_SIGNALING	0.530364	0.631386	0.0766747	0.357121	0.926841	17	Nf1/Tle1/Adgrg1/Ldb1/Rasa1/Ets2/Thy1
HALLMARK_NOTCH_SIGNALING	0.636538	0.740161	0.0649408	0.311335	0.858986	20	Ppard/Sap30/Notch2
HALLMARK_PI3K_AKT_MTOR_SIGNALING	0.702381	0.79816	0.0706196	-0.22698	-0.863044	91	Gna14/Trib3/Pik3r3/Tiam1/Cdk1/Pdk1/Pfn1/Cltc/Mapk9/Vav3/Hsp90b1/Pak4/Mapk1/Ppp2r1b/Lck/Slc2a1/Cfl1/Calr
HALLMARK_OXIDATIVE_PHOSPHORYLATION	0.784874	0.872082	0.048799	0.20905	0.868248	193	Mgst3/Ndufab1/Alas1/Ndufa1/Sdhd/Timm9/Atp5e/Mrps11/Uqcrq/Timm17a/Timm8b/Uqcr11/Cox7a2/Slc25a20/Cox7b/Timm13/Mrpl15/Ndufc2/Ndufb6/Ndufb3/Ndufb4/Nqo2/Mrpl34/Atp5g2/Uqcr10/Cpt1a/Atp6v0b/Idh1/Atp5g1/Cox7c/Atp5k/Polr2f/Timm50/Ndufa4/Vdac1/Ndufa2/Uqcrb/Prdx3/Grpel1/Ndufs6/Mtrf1/Hsd17b10/Fxn/Atp5j2/Atp5g3/Ndufc1/Fh1/Timm10/Ndufa3/Mrps30/Mrpl35/Pdp1/Cs/Ech1/Ndufb2/Cox10/Tcirg1/Mtrr/Cyc1/Etfa/Cox6a1/Ndufs…
HALLMARK_ADIPOGENESIS	0.82149	0.892924	0.0481184	0.209333	0.850644	159	Adcy6/Bcl6/Angptl4/Abca1/Scarb1/Esrra/Mgst3/Gpx3/Itsn1/Itih5/Elovl6/Vegfb/Tob1/Ndufab1/Lipe/Nmt1/Uqcrq/Uqcr11/Cox7b/Dhcr7/Mrpl15/Pdcd4/Sqor/Pim3/Slc25a1/Aldh2/Ddt/Uqcr10/Idh1/Lpcat3/Ppm1b/Nkiras1
HALLMARK_PANCREAS_BETA_CELLS	0.922201	0.960626	0.0469759	0.263314	0.599078	10	Akt3/Foxo1/Stxbp1/Srp9/Elp4
HALLMARK_TGF_BETA_SIGNALING	0.909292	0.960626	0.0546808	-0.213979	-0.693165	38	Id3/Bmpr2/Tgfbr1/Rab31/Ppp1r15a
HALLMARK_UNFOLDED_PROTEIN_RESPONSE	1	1	0.0380056	0.15864	0.609358	99	Slc1a4/Ddit4/Paip1/Tubb2a/Slc7a5/Exosc2/Cks1b/Dkc1/Nolc1/Rrp9/Eif4ebp1/Zbtb17/Nop56/Nhp2/Atf4/Tatdn2/Banf1/Dcp2/Exosc5/Exosc1/Eif2s1/Npm1/Nfya/Wfs1/Ifit1bl1
HALLMARK_GLYCOLYSIS	0.982927	1	0.0555947	-0.176165	-0.702131	136	Il13ra1/Hmmr/Nt5e/Phka2/Pfkfb1/Cdk1/Pam/Glce/Ang/Homer1/Glrx/Chpf2/Hk2/Eno1/Aldoa/Pfkp/Qsox1/Prps1

## Sheet: Supplementary file 1e
Supplementary file 1e. Top 50 Canonical Pathways between NCOR1-cKO and WT naive Treg cells
Ingenuity Canonical Pathways	-log(p-value)	zScore	Ratio	Molecules
Superpathway of Cholesterol Biosynthesis	9.26	3.60555	0.542	CYP51A1,DHCR24,FDFT1,FDPS,HMGCR,HMGCS1,IDI1,LSS,MSMO1,MVK,NSDHL,SQLE,TM7SF2
Cholesterol Biosynthesis I	6.85	2.82843	0.667	CYP51A1,DHCR24,FDFT1,LSS,MSMO1,NSDHL,SQLE,TM7SF2
Cholesterol Biosynthesis II (via 24,25-dihydrolanosterol)	6.85	2.82843	0.667	CYP51A1,DHCR24,FDFT1,LSS,MSMO1,NSDHL,SQLE,TM7SF2
Cholesterol Biosynthesis III (via Desmosterol)	6.85	2.82843	0.667	CYP51A1,DHCR24,FDFT1,LSS,MSMO1,NSDHL,SQLE,TM7SF2
Crosstalk between Dendritic Cells and Natural Killer Cells	5.74	-1.26491	0.258	ACTB,ACTG1,ACTG2,CAMK2D,CD40LG,CD80,CD83,CD86,FASLG,HLA-A,HLA-E,HLA-F,IL2RB,LTA,LTB,NECTIN2
RhoA Signaling	4.9	-2.82843	0.207	ACTB,ACTG1,ACTG2,ARHGAP5,ARHGAP9,ARHGEF1,BAIAP2,CDC42EP3,CFL1,MPRIP,MSN,MYL12B,PFN1,RDX,ROCK2,SEPTIN1,SEPTIN8,SEPTIN9
Zymosterol Biosynthesis	4.04	2	0.8	CYP51A1,MSMO1,NSDHL,TM7SF2
Caveolar-mediated Endocytosis Signaling	3.99		0.22	ACTB,ACTG1,ACTG2,B2M,FLNA,HLA-A,HLA-E,HLA-F,ITGAE,ITGB2,ITGB3,ITGB7,ITGB8
Dendritic Cell Maturation	3.86	-2.82843	0.16	B2M,CD1D,Cd1d2,CD40LG,CD80,CD83,CD86,FCGR3A/FCGR3B,HLA-A,HLA-DOB,HLA-E,HLA-F,IRF8,JAK2,LTA,LTB,NFKBIA,PLCB4,PLCL1,RELB,STAT1
Allograft Rejection Signaling	3.77		0.256	B2M,CD40LG,CD80,CD86,FASLG,H2-K2/H2-Q9,HLA-A,HLA-DOB,HLA-E,HLA-F
PD-1, PD-L1 cancer immunotherapy pathway	3.72	3	0.182	B2M,CD80,CDKN1B,FOXP3,HLA-A,HLA-DOB,HLA-E,HLA-F,IL2RA,IL2RB,JAK2,LAT,LCK,LCP2,STAT5A,STAT5B
Th1 and Th2 Activation Pathway	3.66		0.152	CD40LG,CD80,CD86,HLA-A,HLA-DOB,IL18R1,IL1RL1,IL2RA,IL2RB,IL4R,IL6R,IRF1,ITGB2,JAK2,LTA,NFATC3,SOCS1,STAT1,STAT5A,STAT5B,TNFRSF4,TNFSF11
RhoGDI Signaling	3.6	1.29099	0.157	ACTB,ACTG1,ACTG2,ARHGAP5,ARHGAP9,ARHGDIA,ARHGDIB,ARHGEF1,ARHGEF10,Cdc42,CFL1,GNA15,GNAI3,GNB1,MSN,MYL12B,RAC2,RDX,RHOH,ROCK2
Leukocyte Extravasation Signaling	3.49	-0.447214	0.145	ACTB,ACTG1,ACTG2,ARHGAP5,ARHGAP9,CLDN10,GNAI3,ITGB2,ITGB3,MMP14,MMP9,MSN,NCF1,RAC2,RAPGEF4,RASSF5,RDX,RHOH,ROCK2,SELPLG,SIPA1,THY1,VCAM1
Antigen Presentation Pathway	3.47		0.286	B2M,HLA-A,HLA-DOB,HLA-E,HLA-F,PSMB8,TAP1,TAPBP
B Cell Development	3.28		0.304	CD79B,CD80,CD86,HLA-A,HLA-DOB,IGHM,PTPRC
Type I Diabetes Mellitus Signaling	3.27	0	0.167	CD80,CD86,FASLG,HLA-A,HLA-DOB,HLA-E,HLA-F,IRAK1,IRF1,JAK2,LTA,NFKBIA,SOCS1,SOCS2,SOCS7,STAT1
Autoimmune Thyroid Disease Signaling	3.24		0.267	CD40LG,CD80,CD86,FASLG,HLA-A,HLA-DOB,HLA-E,HLA-F
iCOS-iCOSL Signaling in T Helper Cells	3.17	-1.94145	0.163	Calm1 (includes others),CAMK2D,CD40LG,CD80,CD86,HLA-A,HLA-DOB,IL2RA,IL2RB,LAT,LCK,LCP2,NFATC3,NFKBIA,PPP3CC,PTPRC
Altered T Cell and B Cell Signaling in Rheumatoid Arthritis	3.16		0.183	CD40LG,CD79B,CD80,CD86,FASLG,HLA-A,HLA-DOB,LTA,LTB,RELB,SLAMF1,TNFRSF13B,TNFSF11
T Helper Cell Differentiation	2.99		0.185	BCL6,CD40LG,CD80,CD86,FOXP3,HLA-A,HLA-DOB,IL18R1,IL2RA,IL4R,IL6R,STAT1
Superpathway of Geranylgeranyldiphosphate Biosynthesis I (via Mevalonate)	2.98	2.23607	0.385	FDPS,HMGCR,HMGCS1,IDI1,MVK
Role of JAK2 in Hormone-like Cytokine Signaling	2.82		0.259	JAK2,SOCS1,SOCS2,SOCS7,STAT1,STAT5A,STAT5B
Cell Cycle: G2/M DNA Damage Checkpoint Regulation	2.69	-1.66667	0.205	AURKA,CCNB2,CDK1,CHEK1,CHEK2,CKS1B,PLK1,TOP2A,YWHAZ
Communication between Innate and Adaptive Immune Cells	2.64		0.177	B2M,CD40LG,CD79B,CD80,CD83,CD86,HLA-A,HLA-E,HLA-F,IGHM,TNFRSF13B
Systemic Lupus Erythematosus In T Cell Signaling Pathway	2.64	-1.63299	0.124	B2M,BCL6,CD40LG,CD80,CD86,Cdc42,FASLG,FOXP3,GNAI3,H2-K2/H2-Q9,HLA-A,HLA-DOB,HLA-E,HLA-F,LAT,MSN,PPP2CB,PPP3CC,RAC2,RDX,RHOH,ROCK2,RPTOR,SELPLG
Agranulocyte Adhesion and Diapedesis	2.63		0.145	ACTB,ACTG1,ACTG2,CLDN10,FN1,GNAI3,ITGB2,ITGB7,MMP14,MMP9,MSN,RDX,SDC4,SELL,SELPLG,VCAM1
CTLA4 Signaling in Cytotoxic T Lymphocytes	2.59		0.167	B2M,CD80,CD86,CTLA4,HLA-A,HLA-E,HLA-F,JAK2,LAT,LCK,LCP2,PPP2CB
ILK Signaling	2.55	-1.29099	0.133	ACTB,ACTG1,ACTG2,Cdc42,CFL1,FLNA,FN1,GSK3A,ITGB2,ITGB3,ITGB7,ITGB8,MMP9,MYC,PPP1R14B,PPP2CB,RAC2,RHOH,RICTOR
Mevalonate Pathway I	2.54	2	0.4	HMGCR,HMGCS1,IDI1,MVK
Interferon Signaling	2.54	-1.13389	0.233	IFI35,IRF1,JAK2,PSMB8,SOCS1,STAT1,TAP1
Th1 Pathway	2.5	0.27735	0.146	CD40LG,CD80,CD86,HLA-A,HLA-DOB,IL18R1,IL6R,IRF1,ITGB2,JAK2,LTA,NFATC3,SOCS1,STAT1,TNFSF11
Protein Kinase A Signaling	2.46	-0.755929	0.11	AKAP1,Calm1 (includes others),CAMK2D,CDKN3,CNGA1,DUSP10,DUSP2,DUSP4,DUSP5,DUSP6,FLNA,GNAI3,GNB1,GSK3A,H3-3A/H3-3B,MAP3K1,MTMR3,MYL12B,NFATC3,NFKBIA,PDE3B,PDE4A,PLCB4,PLCL1,PPP1CA,PPP1R14B,PPP3CC,PTPN9,PTPRC,ROCK2,SMPDL3A,YWHAZ
Signaling by Rho Family GTPases	2.43	-2.84019	0.123	ACTB,ACTG1,ACTG2,ARHGEF1,ARHGEF10,BAIAP2,Cdc42,CDC42EP3,CFL1,GNA15,GNAI3,GNB1,MSN,MYL12B,NCF1,RAC2,RDX,RHOH,ROCK2,SEPTIN1,SEPTIN8,SEPTIN9
Epoxysqualene Biosynthesis	2.36		1	FDFT1,SQLE
Role of NFAT in Regulation of the Immune Response	2.35	-1.69775	0.128	Calm1 (includes others),CD79B,CD80,CD86,CSNK1E,FCGR3A/FCGR3B,GNA15,GNAI3,GNB1,GSK3A,HLA-A,HLA-DOB,LAT,LCK,LCP2,NFATC3,NFKBIA,PLCB4,PPP3CC
Role of Macrophages, Fibroblasts and Endothelial Cells in Rheumatoid Arthritis	2.34		0.113	APC2,Calm1 (includes others),CAMK2D,FCGR3A/FCGR3B,FN1,FZD5,IL16,IL17RA,IL18R1,IL1RL1,IL6R,IRAK1,JAK2,LTA,LTB,MYC,NFATC3,NFKBIA,PLCB4,PLCL1,PPP3CC,ROCK2,SOCS1,TNFSF11,TRAF1,VCAM1,WNT10A
Regulation of Actin-based Motility by Rho	2.32	-3	0.162	ACTB,ACTG2,ARHGDIA,BAIAP2,Cdc42,CFL1,MPRIP,MYL12B,PFN1,RAC2,RHOH
Actin Cytoskeleton Signaling	2.31	-2.82843	0.124	ACTB,ACTG1,ACTG2,APC2,ARHGAP24,ARHGEF1,BAIAP2,CFL1,FLNA,FN1,MPRIP,MSN,MYL12B,PFN1,RAC2,RDX,ROCK2,SSH3,TIAM1,TRIO
Estrogen-mediated S-phase Entry	2.3	0.447214	0.24	CCNA2,CDK1,CDKN1B,E2F2,MYC,TFDP1
Role of JAK family kinases in IL-6-type Cytokine Signaling	2.3		0.24	IL6R,JAK2,SOCS1,STAT1,STAT5A,STAT5B
Graft-versus-Host Disease Signaling	2.29		0.212	CD80,CD86,FASLG,HLA-A,HLA-DOB,HLA-E,HLA-F
Virus Entry via Endocytic Pathways	2.29		0.148	ACTB,ACTG1,ACTG2,B2M,FLNA,HLA-A,HLA-E,HLA-F,ITGB2,ITGB3,ITGB7,ITGB8,RAC2
Natural Killer Cell Signaling	2.28	-0.229416	0.126	B2M,CFL1,FASLG,FCGR3A/FCGR3B,HLA-A,HLA-E,HLA-F,HSPA8,IL18R1,IL2RB,JAK2,LAT,LCK,LCP2,MAP3K1,NECTIN2,NFATC3,RAC2,RASSF5
Primary Immunodeficiency Signaling	2.21		0.206	CD40LG,IGHM,LCK,PTPRC,TAP1,TNFRSF13B,UNG
Remodeling of Epithelial Adherens Junctions	2.12		0.17	ACTB,ACTG1,ACTG2,ARF6,EXOC2,TUBA1A,TUBA4A,TUBB2B,TUBB4B
Integrin Signaling	2.08	-3.15296	0.118	ACTB,ACTG1,ACTG2,ARF6,ARHGAP5,CAPN10,CAPN2,CAPN3,Cdc42,ITGAE,ITGB2,ITGB3,ITGB7,ITGB8,MPRIP,MYL12B,PFN1,RAC2,RHOH,TSPAN3
Systemic Lupus Erythematosus In B Cell Signaling Pathway	2.03	-0.816497	0.111	Calm1 (includes others),CCND2,CD40LG,CD5,CD79B,FASLG,IGHM,IL6R,IRAK1,IRF5,JAK2,LCK,LILRB3,LTA,LTB,MYC,NFATC3,PAG1,PPP3CC,RAC2,STAT1,STING1,TNFSF11,TRAF1
Kinetochore Metaphase Signaling Pathway	1.92	2.3094	0.138	AURKB,CDCA8,CDK1,CENPE,H2AZ1,MASTL,NEK2,NUF2,PLK1,PPP1CA,PPP1R14B,REC8
Trans, trans-farnesyl Diphosphate Biosynthesis	1.9		0.667	FDPS,IDI1

## Sheet: Supplementary file 1f
Supplementary file 1f. Top 50 Canonical Pathways between NCOR1-cKO and WT effector Treg cells
Ingenuity Canonical Pathways	-log(p-value)	zScore	Ratio	Molecules
Superpathway of Cholesterol Biosynthesis	16.1	3.74166	0.583	CYP51A1,DHCR24,FDFT1,FDPS,HMGCR,HMGCS1,IDI1,LSS,MSMO1,MVK,NSDHL,SC5D,SQLE,TM7SF2
Cholesterol Biosynthesis I	12	3	0.75	CYP51A1,DHCR24,FDFT1,LSS,MSMO1,NSDHL,SC5D,SQLE,TM7SF2
Cholesterol Biosynthesis II (via 24,25-dihydrolanosterol)	12	3	0.75	CYP51A1,DHCR24,FDFT1,LSS,MSMO1,NSDHL,SC5D,SQLE,TM7SF2
Cholesterol Biosynthesis III (via Desmosterol)	12	3	0.75	CYP51A1,DHCR24,FDFT1,LSS,MSMO1,NSDHL,SC5D,SQLE,TM7SF2
LXR/RXR Activation	5.91	-0.447214	0.148	ABCA1,ABCG1,ACACA,CYP51A1,FDFT1,HMGCR,IL1RL1,IL1RN,LDLR,NCOR1,SCD,SREBF1
Zymosterol Biosynthesis	5.64	2	0.8	CYP51A1,MSMO1,NSDHL,TM7SF2
TR/RXR Activation	4.93		0.145	ACACA,HIF1A,LDLR,NCOR1,PDE3B,PIK3C2B,SCARB1,SREBF1,SREBF2,TBL1XR1
Superpathway of Geranylgeranyldiphosphate Biosynthesis I (via Mevalonate)	4.88	2.23607	0.385	FDPS,HMGCR,HMGCS1,IDI1,MVK
Mevalonate Pathway I	4.06	2	0.4	HMGCR,HMGCS1,IDI1,MVK
Epoxysqualene Biosynthesis	3.16		1	FDFT1,SQLE
T Cell Exhaustion Signaling Pathway	3.12	-0.333333	0.0827	BCL6,CD86,HLA-A,JAK2,NFATC1,PDK1,PIK3C2B,PPM1J,RAP2B,STAT1,TGFBR1
Stearate Biosynthesis I (Animals)	3.07	0.447214	0.172	ACSL1,ACSL3,DHCR24,ELOVL6,MBOAT7
LPS/IL-1 Mediated Inhibition of RXR Function	2.91	-1.34164	0.078	ABCA1,ABCG1,ACSL1,ACSL3,HMGCS1,IL1RL1,IL1RN,MGMT,SCARB1,SMOX,SREBF1
Trans, trans-farnesyl Diphosphate Biosynthesis	2.69		0.667	FDPS,IDI1
Th1 and Th2 Activation Pathway	2.31		0.069	CD86,HLA-A,IL1RL1,JAK2,LTA,NFATC1,NOTCH2,PIK3C2B,STAT1,TGFBR1
Th1 Pathway	2.24	0.377964	0.0777	CD86,HLA-A,JAK2,LTA,NFATC1,NOTCH2,PIK3C2B,STAT1
Dendritic Cell Maturation	2.12	-0.707107	0.0687	Cd1d2,CD86,HLA-A,IL1RN,IRF8,JAK2,LTA,PIK3C2B,STAT1
p38 MAPK Signaling	2.11	-0.377964	0.0805	IL1RL1,IL1RN,MKNK2,MYC,PLA2G4F,STAT1,TGFBR1
Oleate Biosynthesis II (Animals)	2.02		0.333	SCD,Scd2
IL-7 Signaling Pathway	2	-0.447214	0.0857	BCL6,CDKN1B,MYC,NFATC1,PIK3C2B,STAT1
Oncostatin M Signaling	1.93		0.118	EPAS1,JAK2,RAP2B,STAT1
Phosphatidylglycerol Biosynthesis II (Non-plastidic)	1.9		0.158	LCLAT1,MBOAT7,PTPMT1
Role of Lipids/Lipid Rafts in the Pathogenesis of Influenza	1.88		0.286	FDPS,RSAD2
Thrombopoietin Signaling	1.87	1.34164	0.0926	JAK2,MYC,PIK3C2B,RAP2B,STAT1
Regulation of the Epithelial-Mesenchymal Transition Pathway	1.84		0.0621	FGF13,HIF1A,JAK2,NOTCH2,PARD6G,PIK3C2B,RAP2B,TGFBR1,WNT10A
Hepatic Fibrosis Signaling Pathway	1.79	0	0.05	CDKN1B,HIF1A,IL1RL1,IL1RN,JAK2,MYC,NCF1,PDK1,PIK3C2B,RAP2B,ROCK2,TGFBR1,VCAM1,WNT10A
Fatty Acid Activation	1.76		0.25	ACSL1,ACSL3
Pregnenolone Biosynthesis	1.76		0.25	CYP11A1,CYP26B1
Caveolar-mediated Endocytosis Signaling	1.72		0.0847	ACTG2,FLNA,FLOT1,HLA-A,ITGAE
Cardiac Hypertrophy Signaling (Enhanced)	1.67	-0.242536	0.0451	CAMK2D,FGF13,HDAC5,IGF1R,IL1RL1,JAK2,LTA,MKNK2,MYC,NFATC1,PDE3B,PDK1,PIK3C2B,RAP2B,ROCK2,TGFBR1,WNT10A
Histidine Degradation VI	1.66		0.222	CYP11A1,CYP26B1
Crosstalk between Dendritic Cells and Natural Killer Cells	1.64		0.0806	ACTG2,CAMK2D,CD86,HLA-A,LTA
Role of Macrophages, Fibroblasts and Endothelial Cells in Rheumatoid Arthritis	1.62		0.0502	CAMK2D,IL1RL1,IL1RN,JAK2,LTA,MYC,NFATC1,PIK3C2B,RAP2B,ROCK2,VCAM1,WNT10A
Lanosterol Biosynthesis	1.58		1	LSS
Melatonin Degradation III	1.58		1	MPO
GM-CSF Signaling	1.58	0.447214	0.0781	CAMK2D,JAK2,PIK3C2B,RAP2B,STAT1
γ-linolenate Biosynthesis II (Animals)	1.57		0.2	ACSL1,ACSL3
T Helper Cell Differentiation	1.56		0.0769	BCL6,CD86,HLA-A,STAT1,TGFBR1
Neuroinflammation Signaling Pathway	1.55	0.632456	0.0507	BIRC6,CD86,HLA-A,JAK2,NCF1,NFATC1,PIK3C2B,PLA2G4F,STAT1,TGFBR1,VCAM1
Th2 Pathway	1.52	2.23607	0.0614	CD86,HLA-A,IL1RL1,JAK2,NOTCH2,PIK3C2B,TGFBR1
Chronic Myeloid Leukemia Signaling	1.51		0.0667	CDKN1B,HDAC5,MYC,PIK3C2B,RAP2B,TGFBR1
Mitochondrial L-carnitine Shuttle Pathway	1.49		0.182	ACSL1,ACSL3
Triacylglycerol Biosynthesis	1.48		0.111	ELOVL6,LCLAT1,MBOAT7
Superpathway of Melatonin Degradation	1.44		0.107	CYP51A1,MPO,SMOX
Ubiquinol-10 Biosynthesis (Eukaryotic)	1.42		0.167	CYP11A1,CYP26B1
CNTF Signaling	1.41	1	0.0816	JAK2,PIK3C2B,RAP2B,STAT1
CTLA4 Signaling in Cytotoxic T Lymphocytes	1.39		0.0694	CD86,HLA-A,JAK2,PIK3C2B,PPM1J
IL-4 Signaling	1.39		0.0694	HLA-A,JAK2,NFATC1,PIK3C2B,RAP2B
ERK/MAPK Signaling	1.37	0	0.0537	MKNK2,MYC,NFATC1,PIK3C2B,PLA2G4F,PPM1J,RAP2B,STAT1
PDGF Signaling	1.37	1.34164	0.0685	JAK2,MYC,PIK3C2B,RAP2B,STAT1

## Sheet: Supplementary file 1g
Supplementary file1g. Naive and effector Treg cell gene sets
Top 100 genes naive Treg cells				Top 100 genes effector Treg cells
gene_name	log2FoldChange	padj		gene_name	log2FoldChange	padj
Tnnt2	-6.98573	0.00029414		Vax2	18.5534	9.41487e-08
Sele	-5.8154	0.000407857		Slc7a10	9.59056	5.52538e-13
Lhfp	-5.71507	0.000545587		Gm6831	9.12632	6.97812e-12
Tspan9	-5.47567	6.04151e-12		Gm8798	8.72994	1.88581e-10
2610307P16Rik	-5.38291	0.000119189		Ccn4	8.72122	6.37946e-11
Bach2os	-5.28335	0.00196075		4930558J18Rik	8.59643	2.15259e-10
Gm20705	-5.27402	0.000863135		Ky	8.21181	1.35312e-09
Myo5c	-5.15775	0.0196975		Krt83	7.96726	4.83286e-09
G0s2	-5.12899	4.24776e-08		Pvrig	7.91398	3.5984e-06
Gm11662	-4.99364	0.0939889		Ces2c	7.68971	9.42909e-41
Gm42899	-4.92129	0.0470191		Il1rn	7.62913	5.30896e-08
1700017M07Rik	-4.91732	0.0177285		Gm49180	7.61307	1.01777e-07
Gm16327	-4.80904	0.0126455		Lpin3	7.60143	5.11473e-06
Gm17212	-4.70097	0.0751416		Gm5159	7.59902	0.0162339
Gm9694	-4.6801	0.0228503		Klk1b27	7.41329	3.56847e-06
Gm37283	-4.65167	0.0275319		Ces2d-ps	7.30317	7.94014e-14
Sorcs2	-4.65075	2.29756e-21		Lrrc49	7.29378	0.000181082
Ampd1	-4.59149	4.09081e-09		B3galt5	7.2903	0.00038002
Gm14125	-4.47316	7.07918e-40		Gpr35	7.28256	0.00030851
Gm17936	-4.46186	0.000373886		Olfr60	7.25026	3.4088e-05
Tex26	-4.41637	0.0744582		Fam81a	7.19514	1.15689e-05
Spats2	-4.31084	0.0554518		Olfr922	7.18014	1.8023e-06
Fam186b	-4.16841	0.0199971		D430019H16Rik	7.16715	0.000493844
Igkv10-96	-4.1329	0.0485943		1700001O22Rik	7.16273	1.02726e-06
Gm37982	-4.04806	0.0705104		Gm37347	7.13376	2.78694e-06
Tmem108	-3.90832	2.06781e-10		Serpina9	7.13077	0.000680564
Cd8a	-3.81108	0.0630872		Klrg1	7.11756	9.11659e-27
Cnn3	-3.80565	6.90111e-79		Gm5541	7.03233	5.28342e-06
Adcy6	-3.77121	1.83042e-09		Insrr	7.0016	9.23769e-06
Gm47879	-3.72708	0.0895638		Ispd	6.98329	3.89889e-05
Sell	-3.72532	1.5517e-50		Selenom	6.91092	5.10692e-06
Nr6a1os	-3.71915	0.0679852		Tigit	6.89798	2.45516e-11
Tcrg-C1	-3.6864	7.86183e-27		Frmd5	6.89446	4.62635e-05
Ly6c1	-3.67443	2.12382e-42		Pkhd1l1	6.89421	0.00326374
Gm19078	-3.67072	0.0557878		Npas4	6.88955	0.000520087
Ly6c2	-3.65297	1.49122e-28		Krt17	6.85957	0.00164712
Cdhr3	-3.64269	1.34391e-06		Tox2	6.85514	4.81354e-10
2810410L24Rik	-3.63603	0.0443295		Nckap5	6.832	3.07565e-05
Ptger3	-3.63124	0.00247943		Srxn1	6.79384	3.01014e-06
Gm36931	-3.61874	6.96788e-05		Cxcl2	6.78019	0.000395836
Sox4	-3.49948	0.000267885		Asb2	6.75066	8.80013e-80
Gm4815	-3.49397	5.91702e-08		Gm42495	6.73679	1.10022e-05
Igfbp4	-3.49136	2.36518e-57		Gm49751	6.71979	0.00618966
4933417C20Rik	-3.41496	0.0808543		Msrb3	6.71297	6.71966e-05
4930556H04Rik	-3.41246	0.00344673		Gm42500	6.70615	1.51553e-05
Col7a1	-3.41149	0.0284086		Col16a1	6.6514	0.0037116
Grifin	-3.40272	2.84885e-06		Sostdc1	6.61967	0.00472184
Aqp11	-3.38862	0.00115167		2210011C24Rik	6.59765	0.000257708
Acvr1c	-3.33884	0.0473723		C030034L19Rik	6.59686	9.96371e-20
Homer3	-3.30033	1.63835e-07		Ighd4-1	6.59529	1.6585e-11
Drc1	-3.2919	0.025452		Ces2b	6.59205	6.59718e-05
C230085N15Rik	-3.18238	3.51177e-43		Ifng	6.5825	1.44648e-05
Amigo2	-3.15133	2.23393e-22		Krt87	6.57372	7.64762e-05
Trgj1	-3.14421	0.0551636		Myh3	6.55412	0.000921701
Selp	-3.12987	0.00278717		Zfp612	6.4761	5.5732e-08
BC049715	-3.12708	0.0268373		Gm12169	6.37238	0.000309463
Gm37248	-3.1117	8.93378e-20		Ccl1	6.36311	0.00230645
Dock4	-3.10873	0.0332896		Moxd2	6.34163	0.000152051
Gm15708	-3.07364	1.0613e-39		Cfap126	6.33857	3.59359e-05
Trim47	-3.06045	0.0971066		Tshz2	6.32364	0.00100644
Tcf7l2	-3.05145	0.00745422		Zan	6.31809	0.0235086
Dapk1	-3.04838	6.11248e-15		Arnt2	6.31627	1.81889e-05
Bach2it1	-3.03858	0.00664932		Gm3278	6.292	0.000320692
Tcrg-C4	-3.02817	3.06724e-16		Gm47418	6.29027	0.01828
Gm48582	-2.99345	0.0167468		Gfra1	6.2668	6.32092e-05
Gm47523	-2.99315	0.0863532		Cyb561	6.24924	0.00145926
Stra6	-2.99062	6.99497e-16		Metrnl	6.19967	0.00106777
4833419F23Rik	-2.98535	0.00334957		Lrrn3	6.17771	0.000465128
Tubb2a-ps2	-2.93503	2.79604e-05		Speg	6.13588	0.000887988
Cybrd1	-2.92161	0.0528986		5730409E04Rik	6.13435	0.00233992
Kcnh3	-2.90955	0.00171086		Atp6v0d2	6.1205	2.22577e-49
Tcrg-C3	-2.89422	0.00466347		Spock2	6.12002	1.28633e-13
Gm10130	-2.88345	3.31963e-21		Alox8	6.11797	3.59786e-17
Gm20696	-2.87754	1.75211e-24		Emp1	6.08227	0.00345602
Prkar1b	-2.87498	0.010539		Mageh1	6.05625	0.00127683
Gm15915	-2.79186	0.0548125		Ccdc80	6.05207	0.000987226
Gm37266	-2.7848	0.0154443		Gm49735	6.0432	0.00192104
Tdrp	-2.78025	1.9328e-21		Gm37729	6.03634	0.00406262
Satb1	-2.77294	1.2604e-61		Parpbp	6.01103	0.00148526
Gm20518	-2.74371	0.0649139		Noxa1	5.97479	2.04782e-07
Gm13546	-2.73565	1.44804e-16		4930428O21Rik	5.97091	0.047972
Gata1	-2.70837	2.43133e-40		Il10	5.95629	1.35718e-06
Plaur	-2.67995	0.0664218		Pltp	5.93078	0.0138122
B430306N03Rik	-2.67761	3.50497e-10		Esm1	5.92911	0.00132736
Gm37176	-2.67542	0.00198851		Fam69c	5.91735	0.0967399
Col11a2	-2.6617	2.14005e-10		Gm11730	5.91323	0.000758061
1700025G04Rik	-2.65934	9.65641e-08		Tlr4	5.89631	0.00656359
Art4	-2.64901	2.62267e-06		Ankrd29	5.8925	1.88107e-05
Treml2	-2.64155	6.96461e-36		Fgl2	5.88633	6.59587e-22
Gm21994	-2.64032	1.25526e-23		Dkkl1	5.87928	0.00021305
Tcrg-C2	-2.63257	3.93561e-07		Gm37759	5.86169	0.001406
Gm37593	-2.61613	1.19077e-06		Slc24a3	5.82954	0.00287809
Zcchc24	-2.60529	0.0428933		Npdc1	5.81517	0.000407887
Tubb2b	-2.60201	3.82979e-17		Vdr	5.80566	0.0153537
Gm49066	-2.59448	0.0163735		Chst2	5.80393	6.63247e-07
Emid1	-2.58566	1.40961e-05		Nxnl2	5.78124	0.00246074
Pyroxd2	-2.57132	0.0616222		Mid2	5.76623	0.01334
Gm45155	-2.56053	0.00277274		Gstt3	5.76352	0.00210824
Atp1b1	-2.55191	5.47237e-37		Vegfc	5.7583	0.00910404
Gm14124	-2.52201	0.000145464		Nsun7	5.7529	0.00230645
